# Supplementary material for: Mitigation of COVID-19 using social distancing of the elderly in Brazil: The vertical quarantine effects in hospitalizations and deaths
Source: medRxiv preprint, doi:10.1101/2021.01.12.21249495, version 1 (2021-01-15)
Supplement: Supplementary Material [file 249495_file02.pdf]

---

# **Mitigation of COVID-19 using social distancing of the elderly: The vertical quarantine effects in hospitalizations and deaths**

Vito Ribeiro Venturieri<sup>1</sup> , Matheus Silva Gonçalves, Vinícius Rios Fuck

## **Supplementary Material**

### **Results for Brazilian state capitals**

Results for São Paulo are in the main text.

---

<sup>1</sup>Corresponding author: [vitoventurieri@yahoo.com.br](mailto:vitoventurieri@yahoo.com.br)

S1. Results for Aracaju

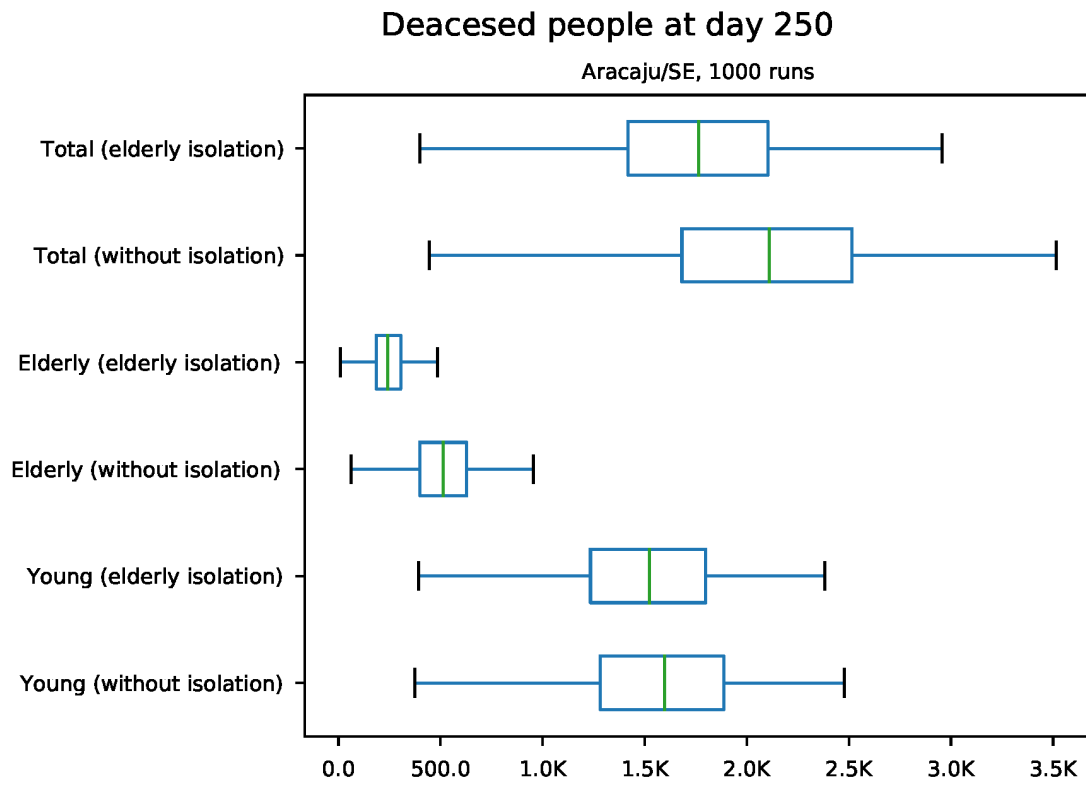

Figure S1: Predicted number of death at day 250 for Aracaju

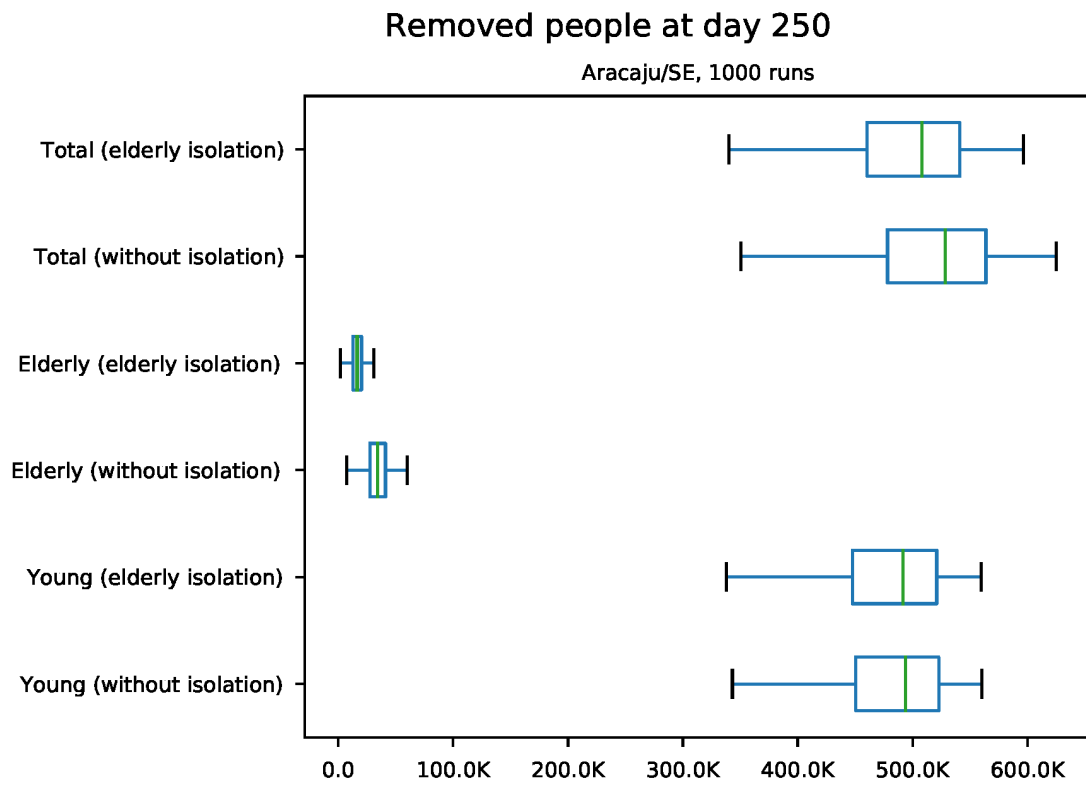

Figure S2: Predicted number of removed individuals at day 250 for Aracaju

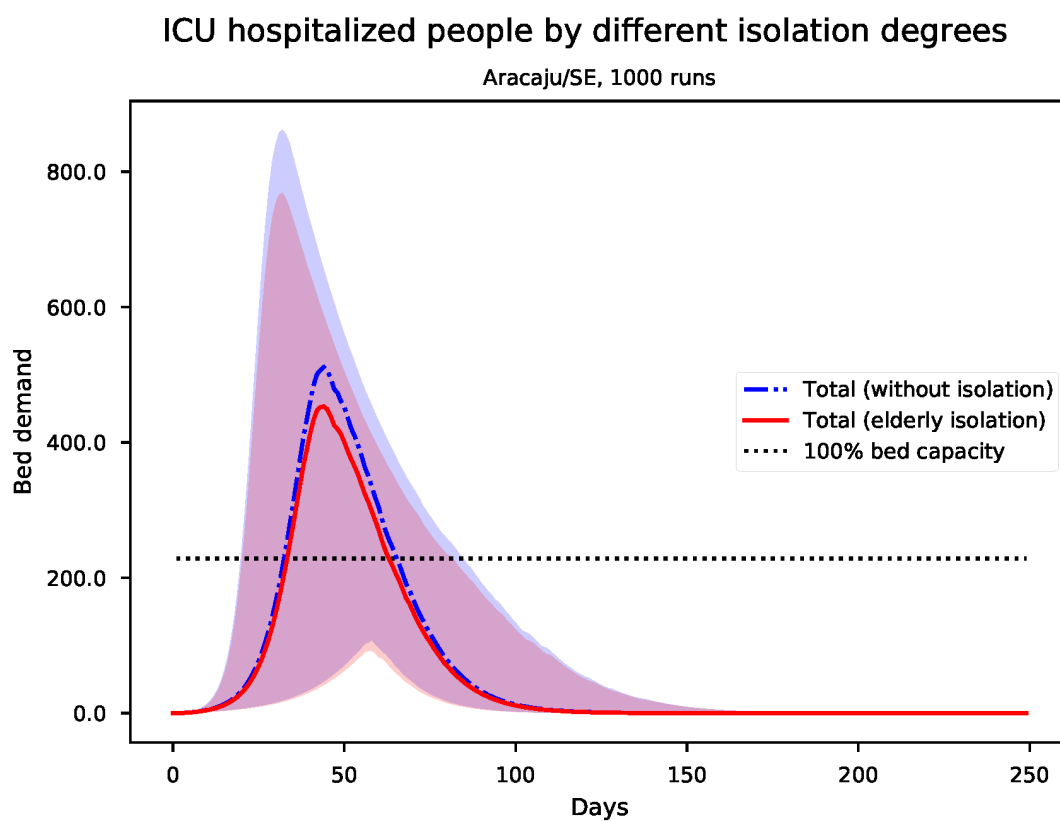

Figure S3: Predicted number of needed ICU beds for Aracaju

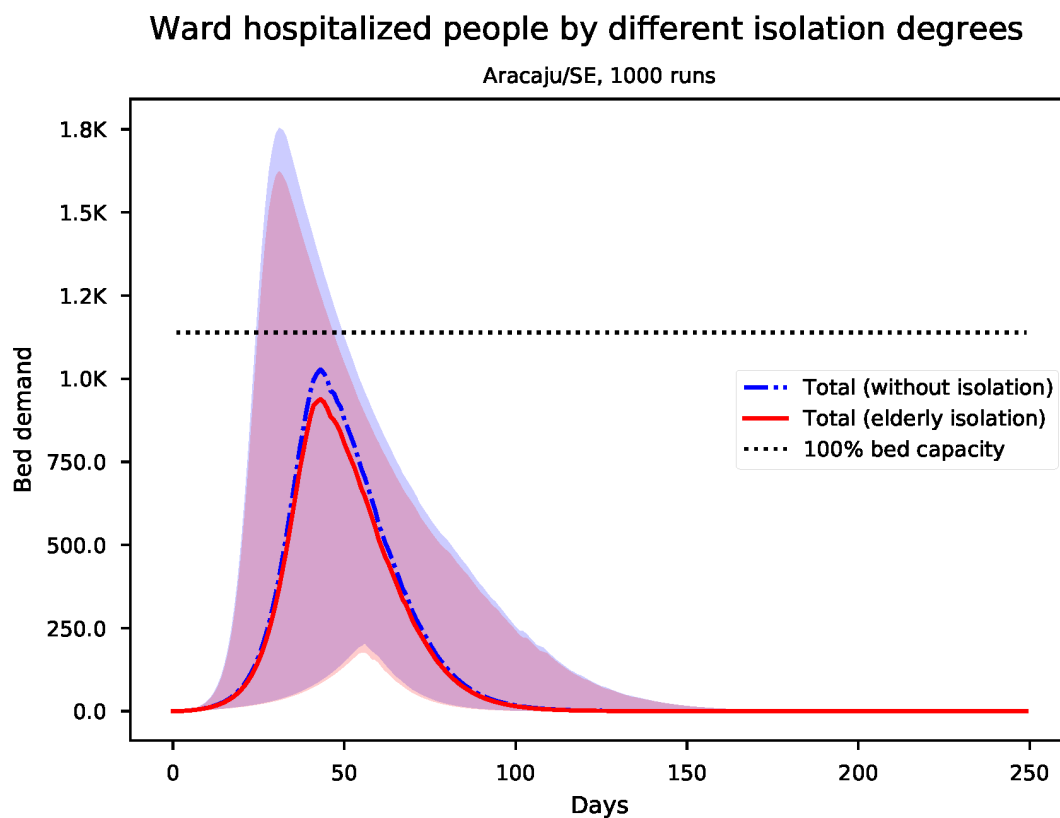

Figure S4: Predicted number of needed ward beds for Aracaju

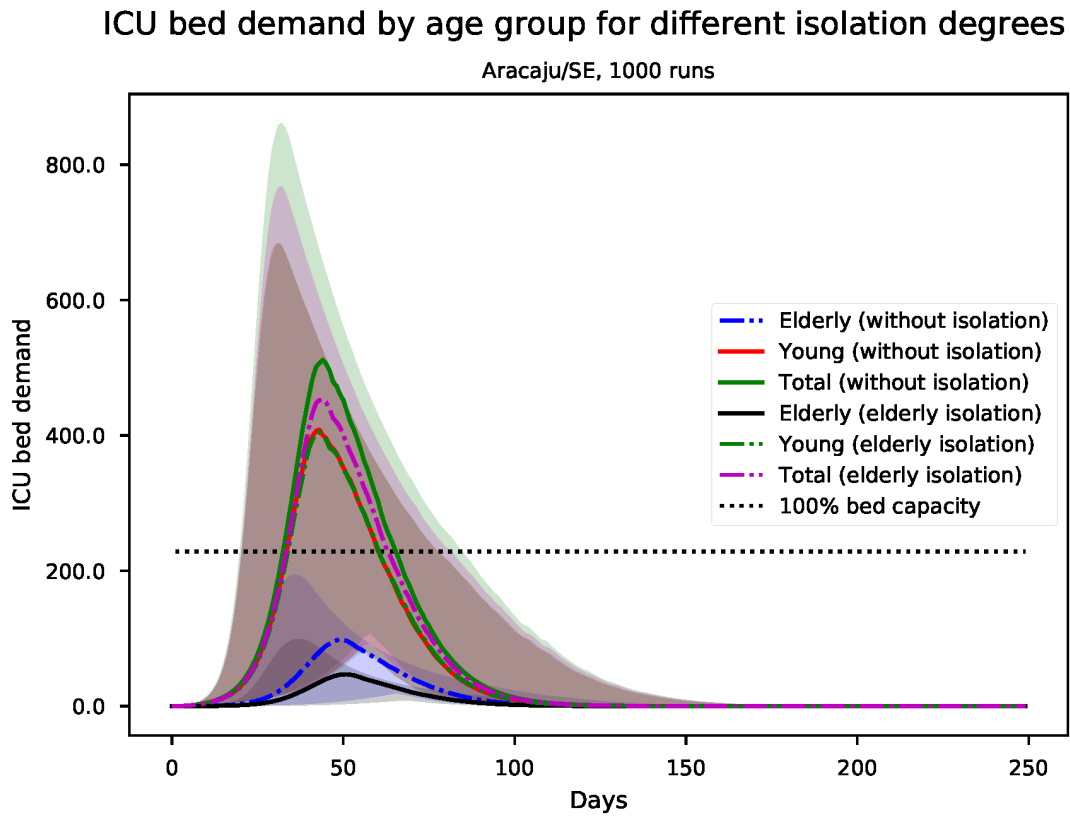

Figure S5: Predicted number of needed ICU beds, by age group for Aracaju

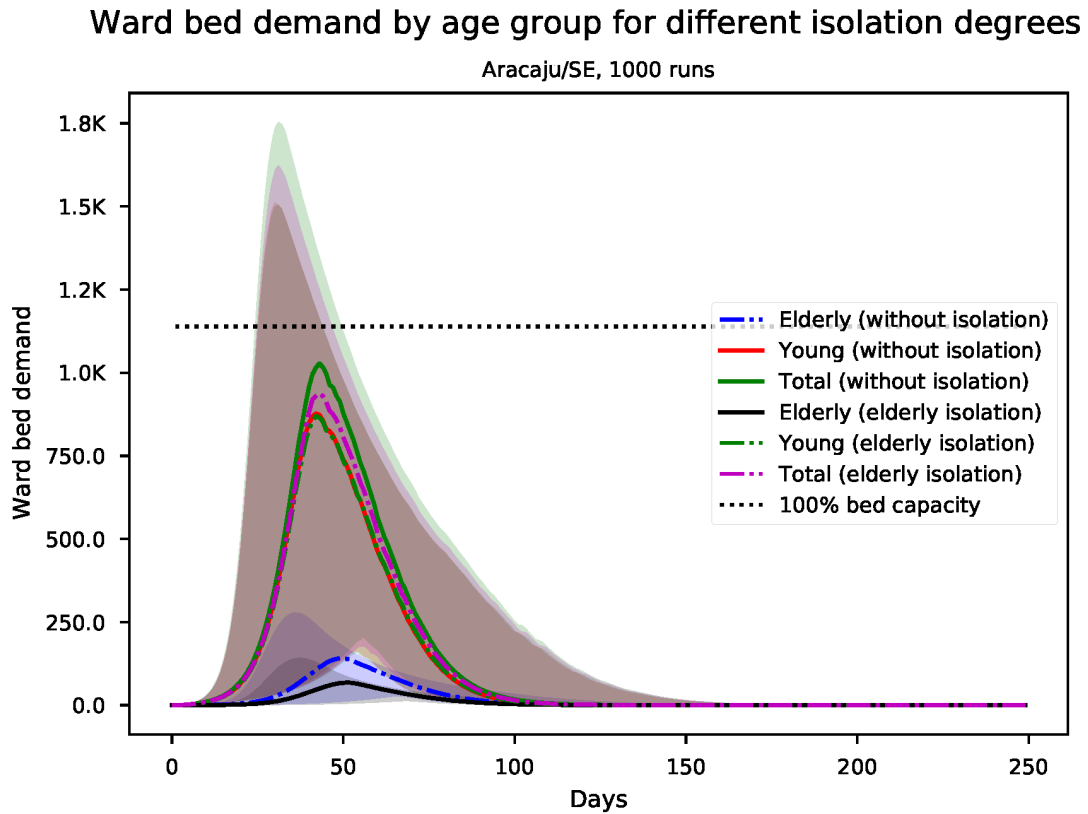

Figure S6: Predicted number of needed ward beds, by age group for Aracaju

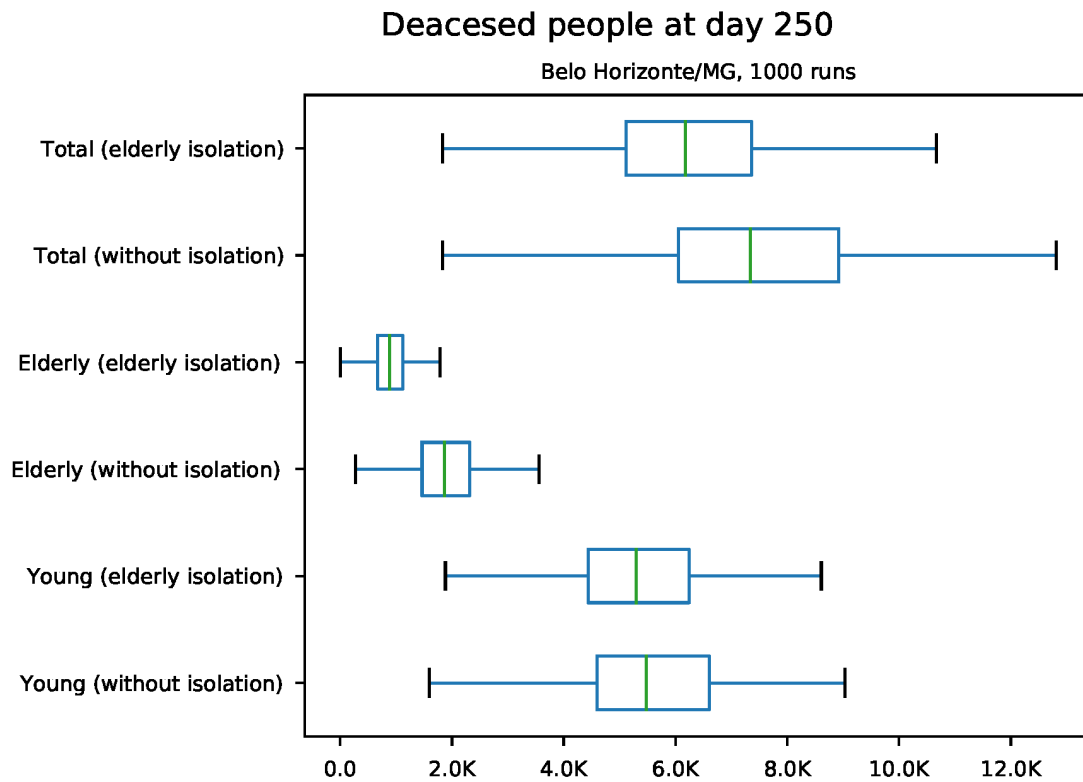

Figure S7: Predicted number of death at day 250 for Belo Horizonte

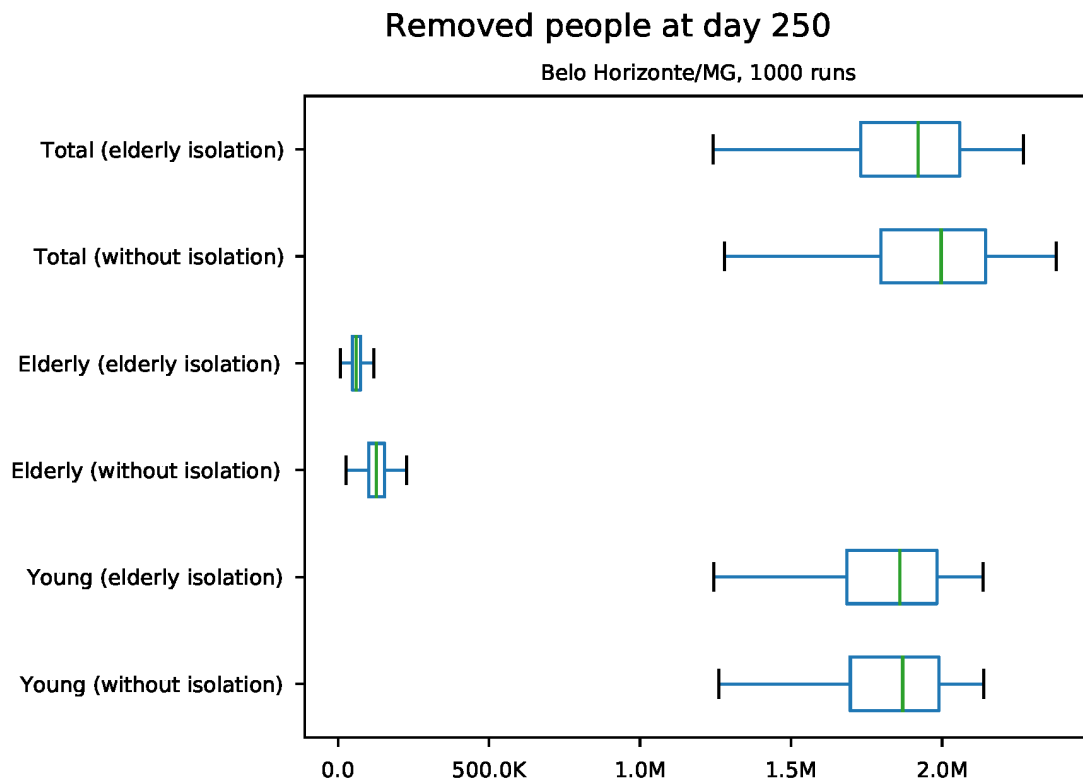

Figure S8: Predicted number of removed individuals at day 250 for Belo Horizonte

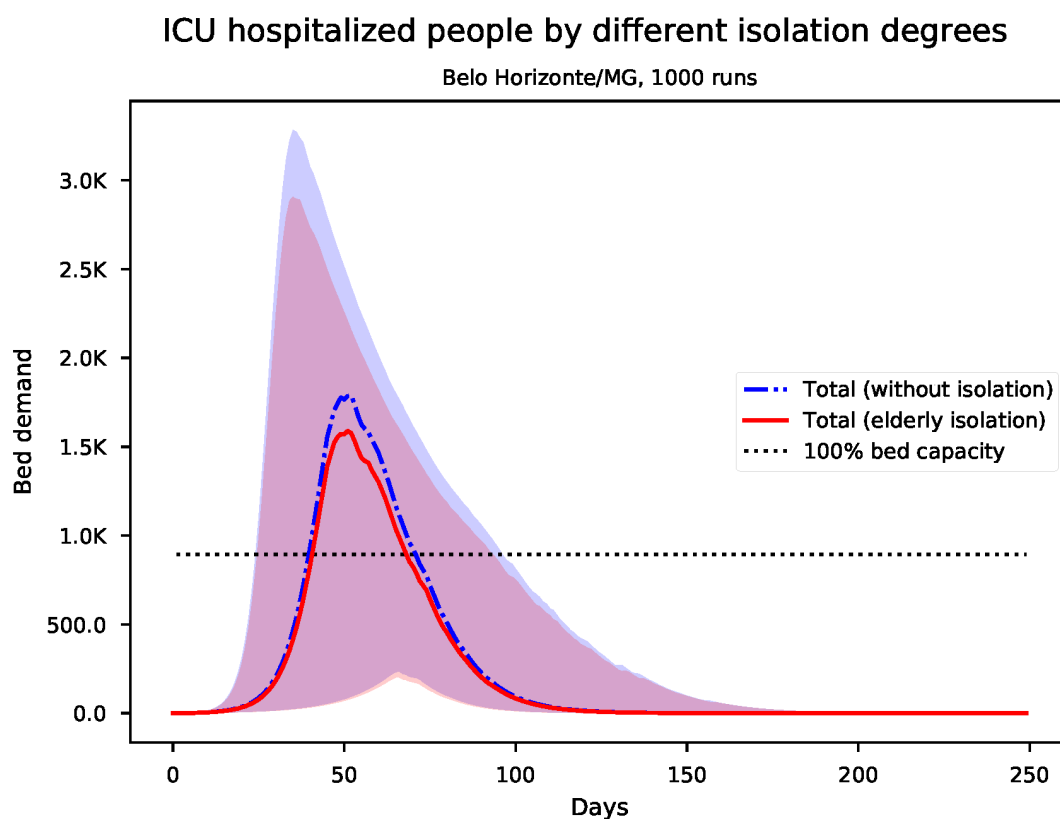

Figure S9: Predicted number of needed ICU beds for Belo Horizonte

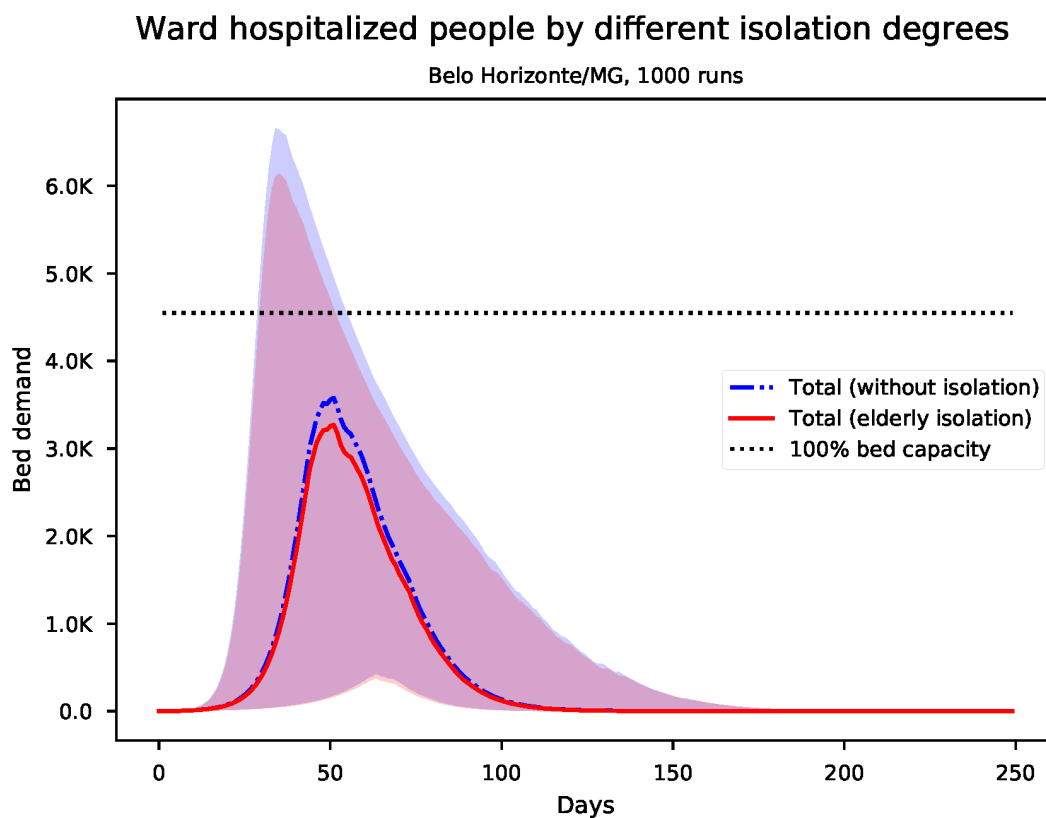

Figure S10: Predicted number of needed ward beds for Belo Horizonte

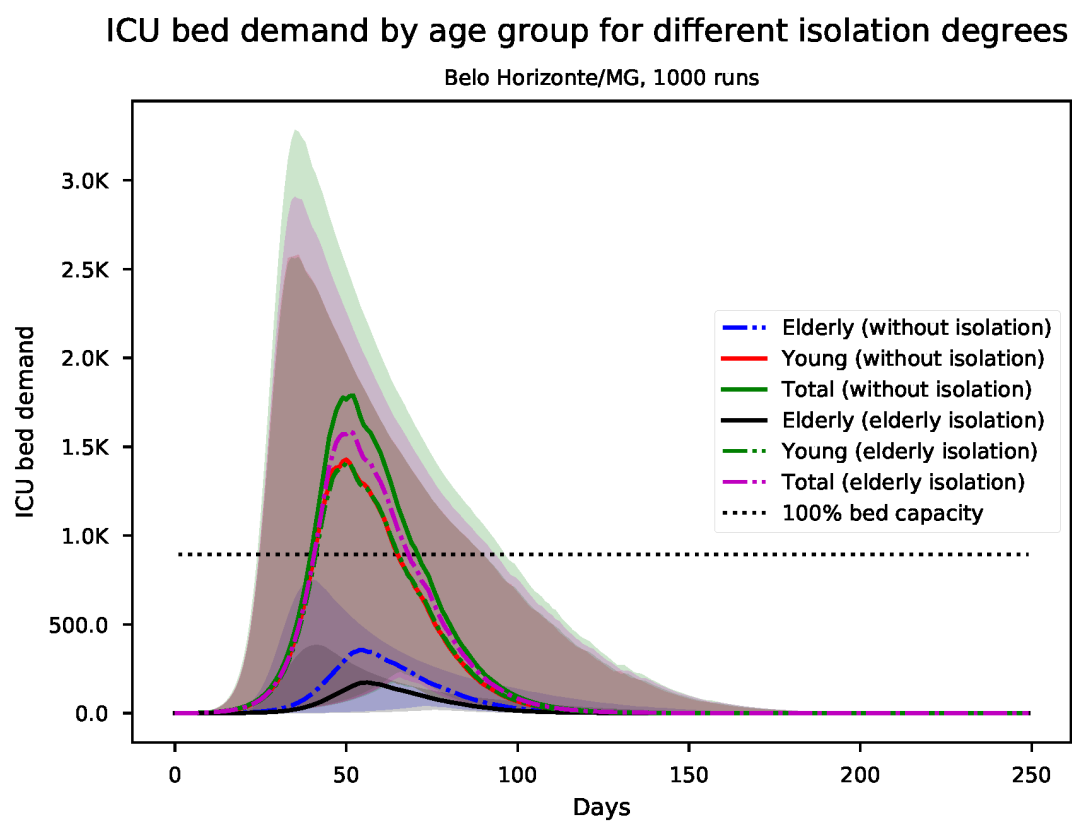

Figure S11: Predicted number of needed ICU beds, by age group for Belo Horizonte

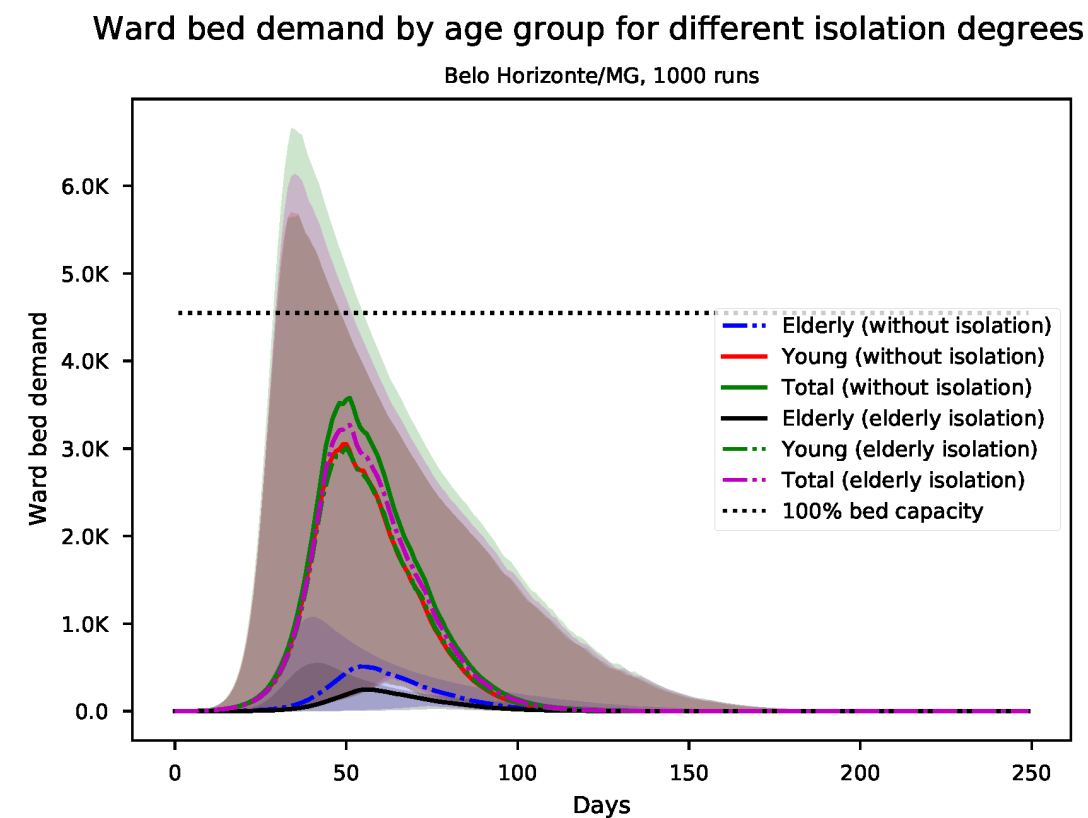

Figure S12: Predicted number of needed ward beds, by age group for Belo Horizonte

S3. Results for Belém

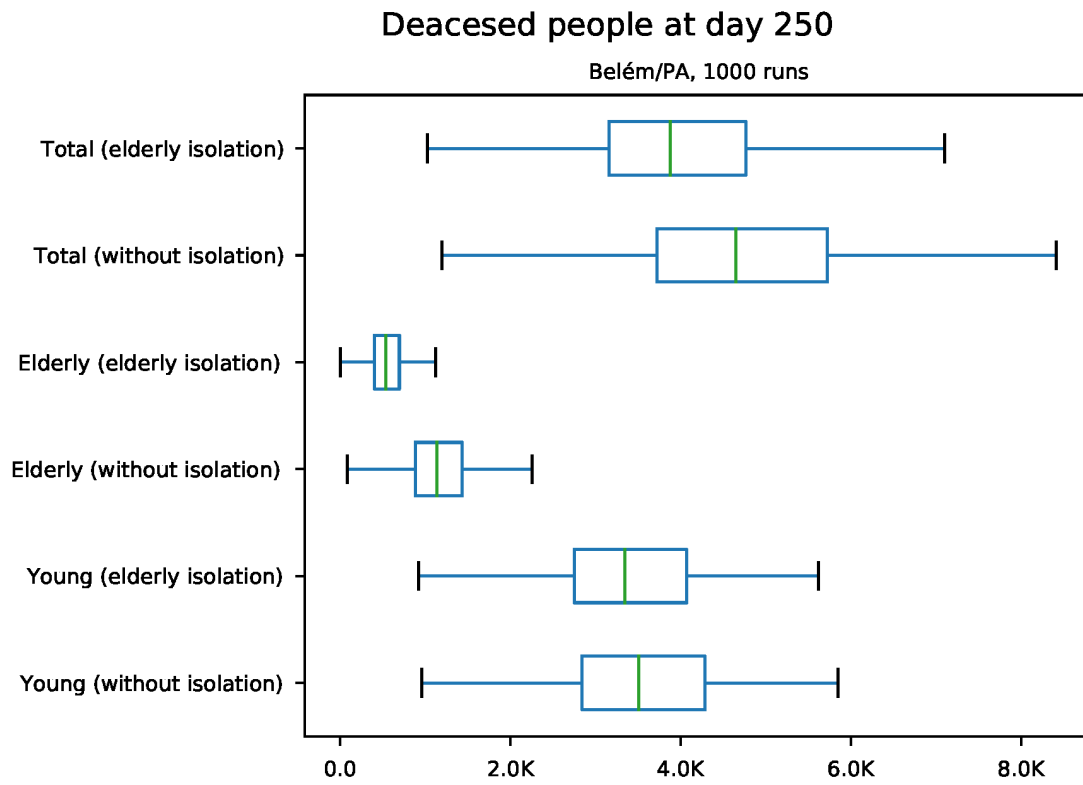

Figure S13: Predicted number of death at day 250 for Belém

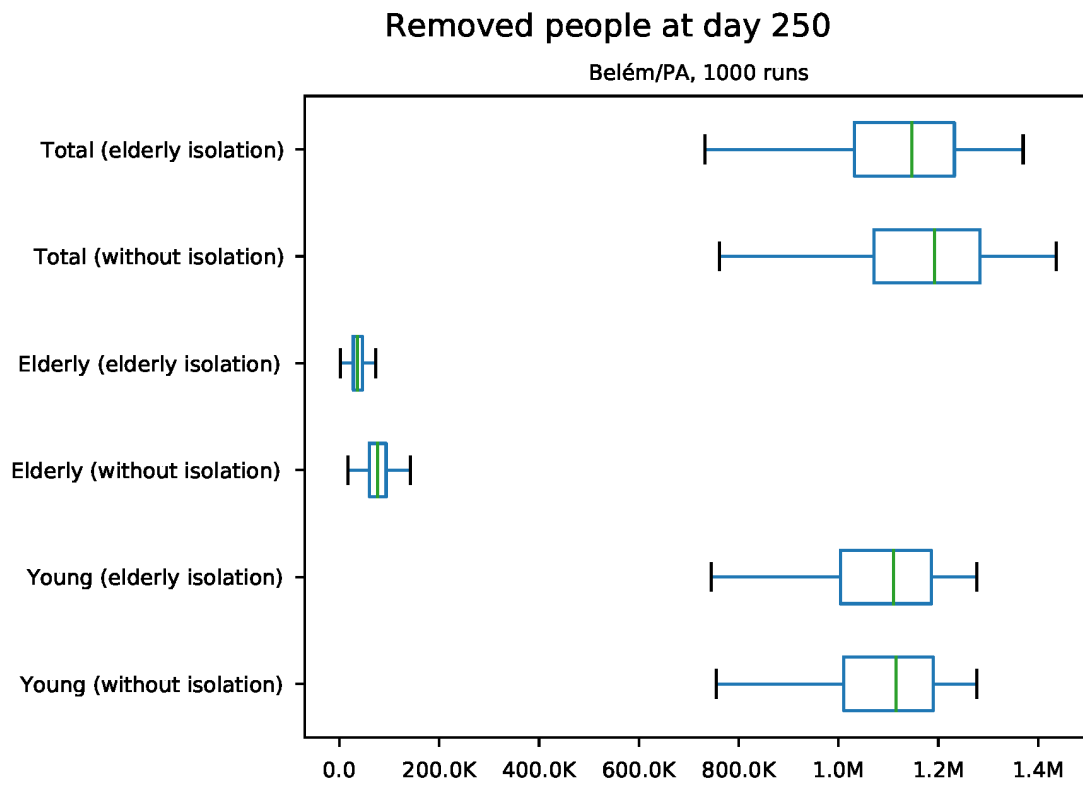

Figure S14: Predicted number of removed individuals at day 250 for Belém

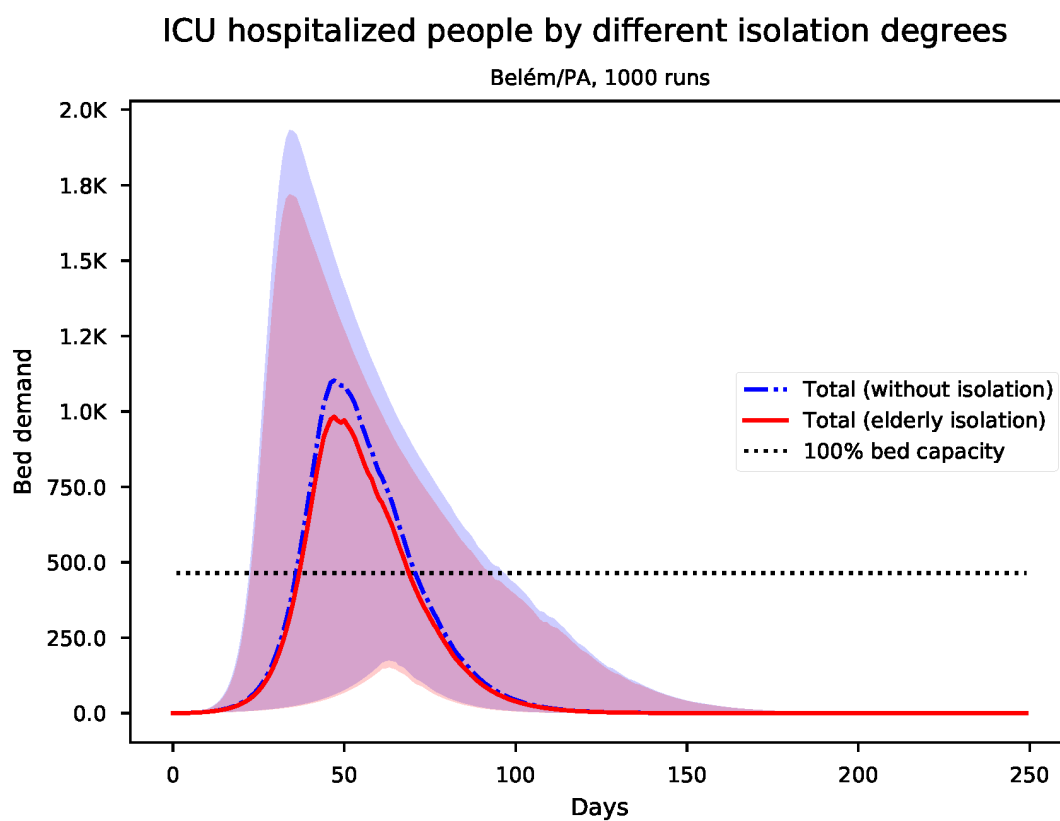

Figure S15: Predicted number of needed ICU beds for Belém

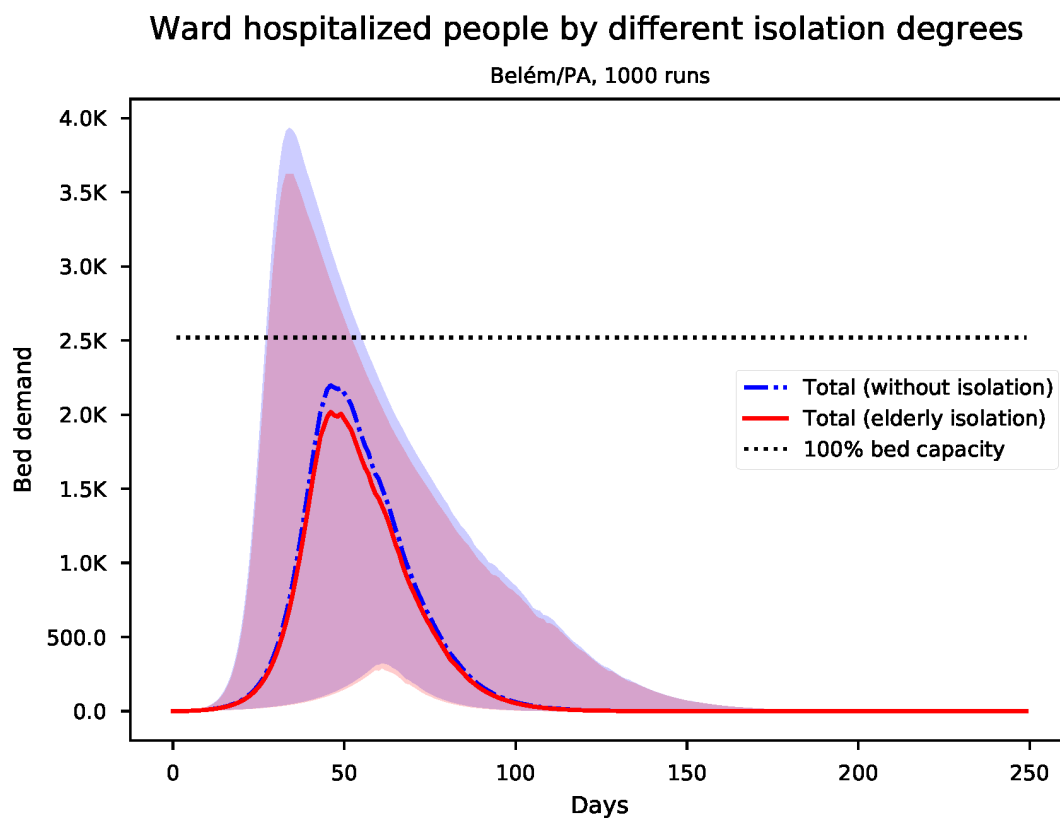

Figure S16: Predicted number of needed ward beds for Belém

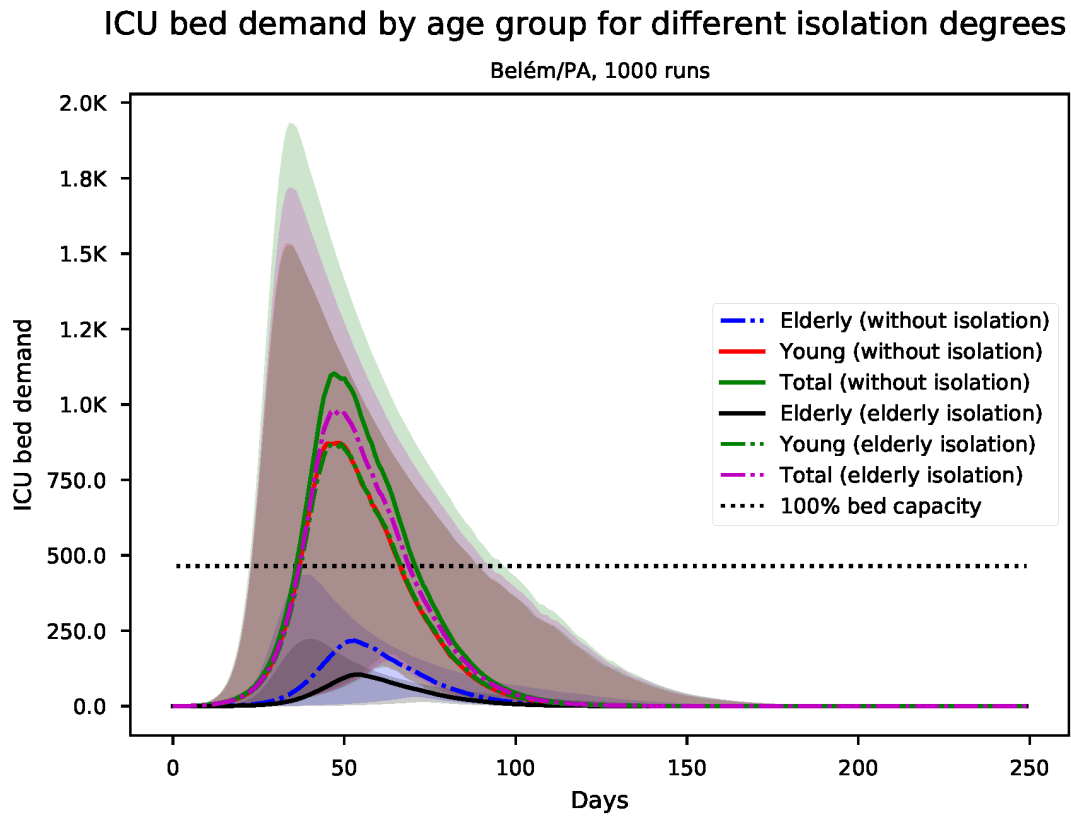

Figure S17: Predicted number of needed ICU beds, by age group for Belém

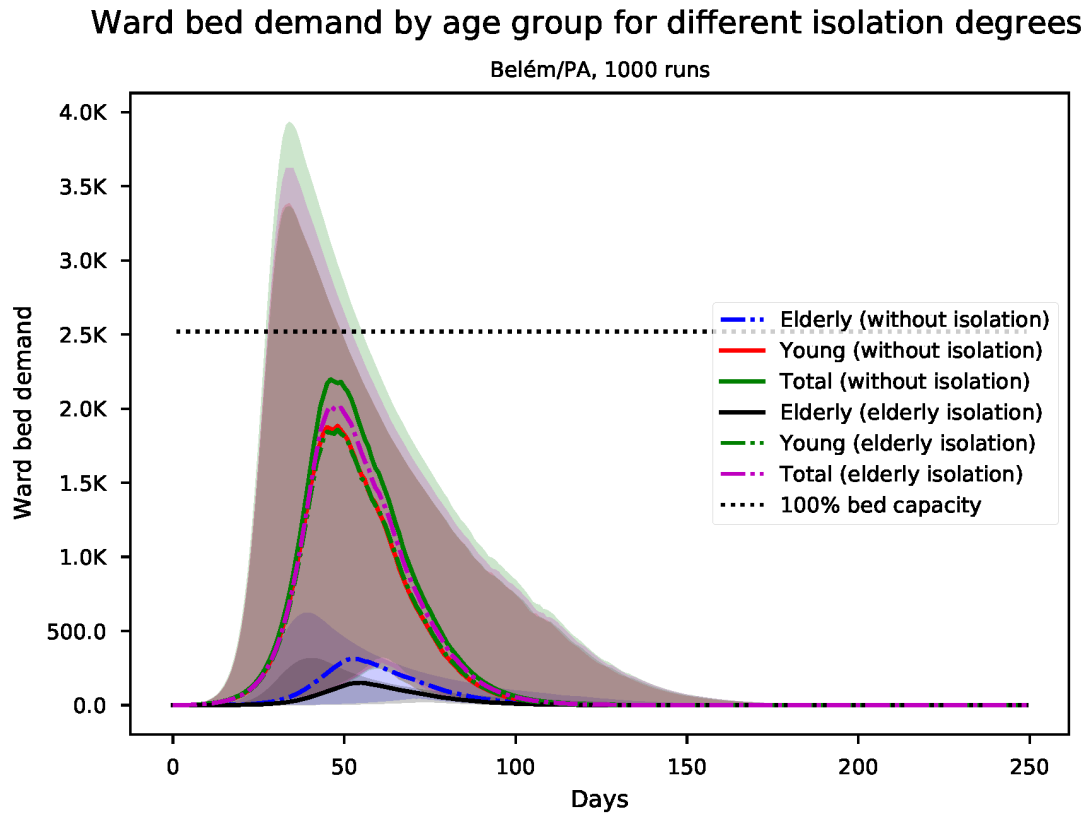

Figure S18: Predicted number of needed ward beds, by age group for Belém

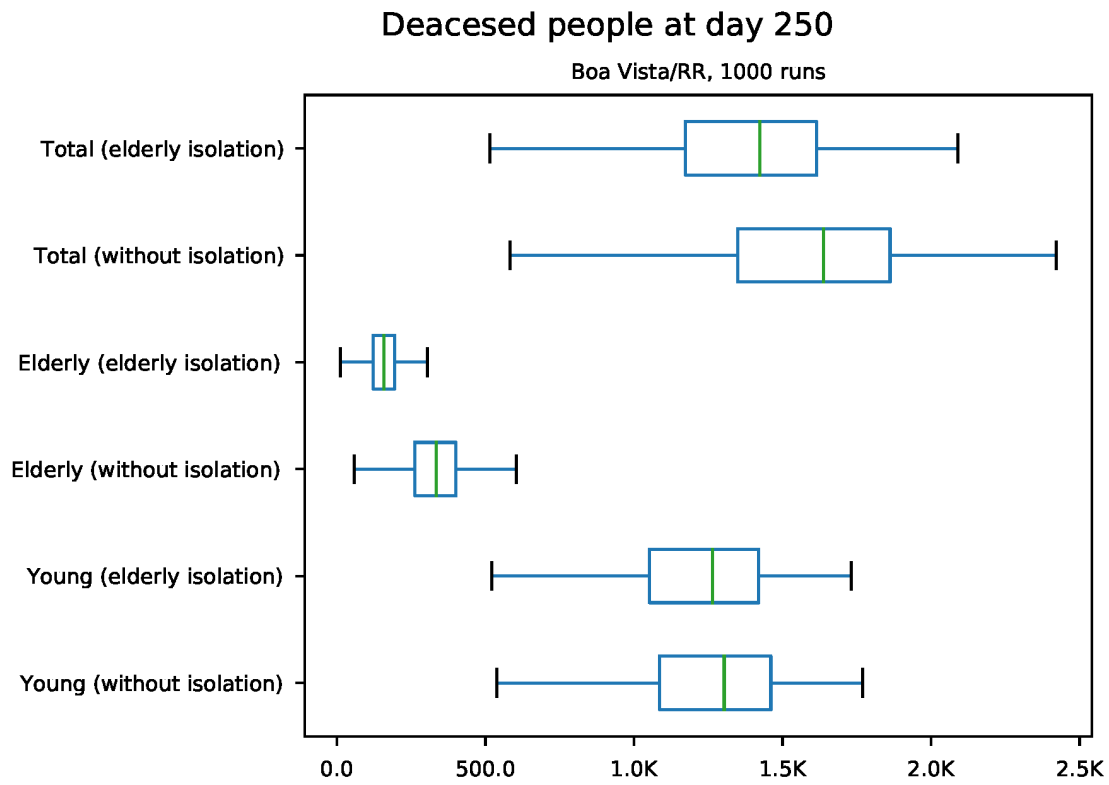

Figure S19: Predicted number of death at day 250 for Boa Vista

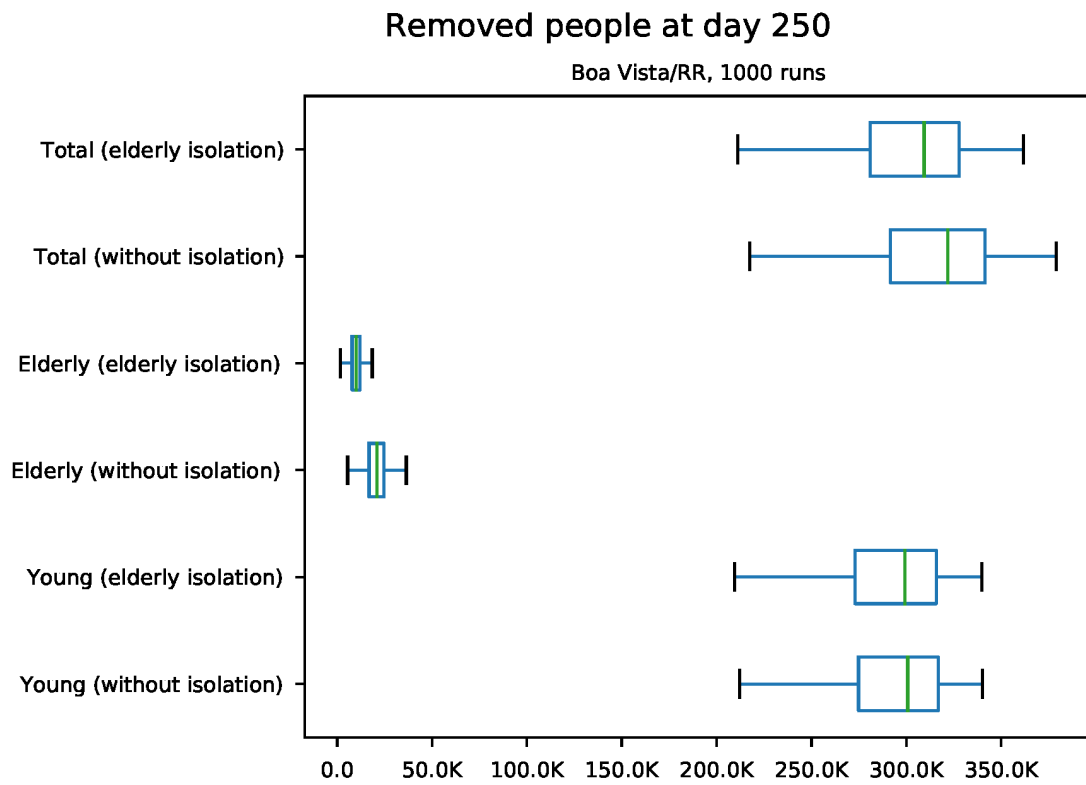

Figure S20: Predicted number of removed individuals at day 250 for Boa Vista

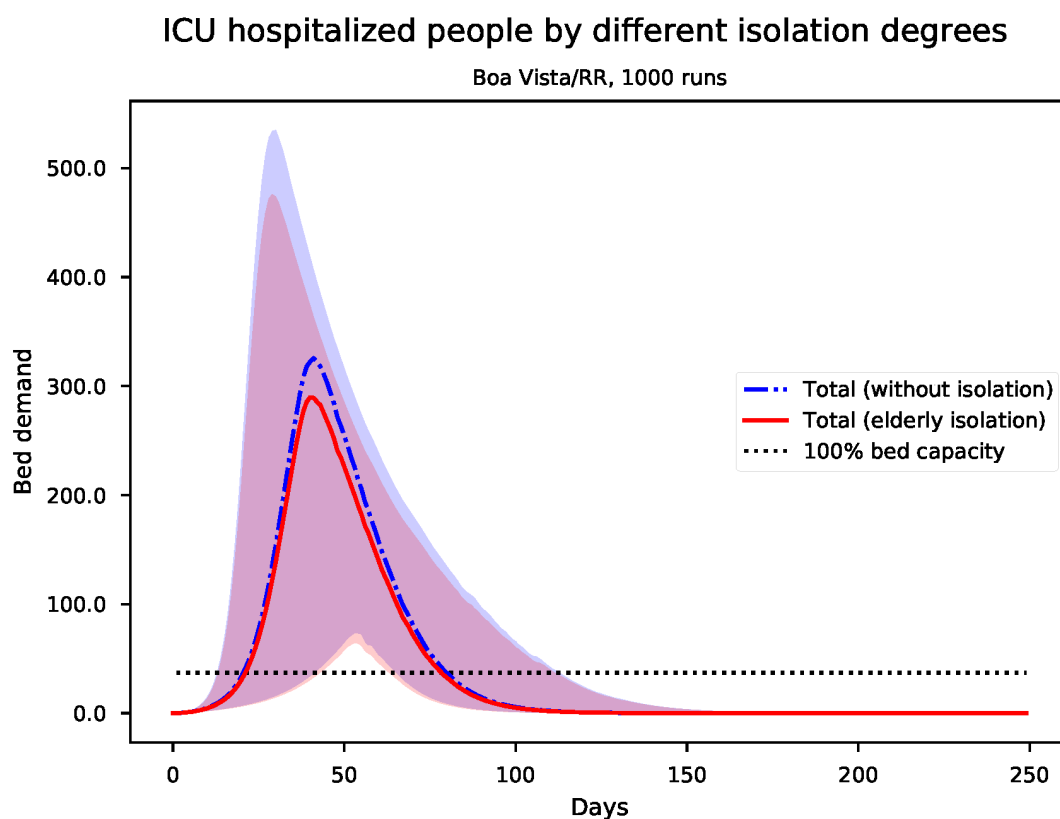

Figure S21: Predicted number of needed ICU beds for Boa Vista

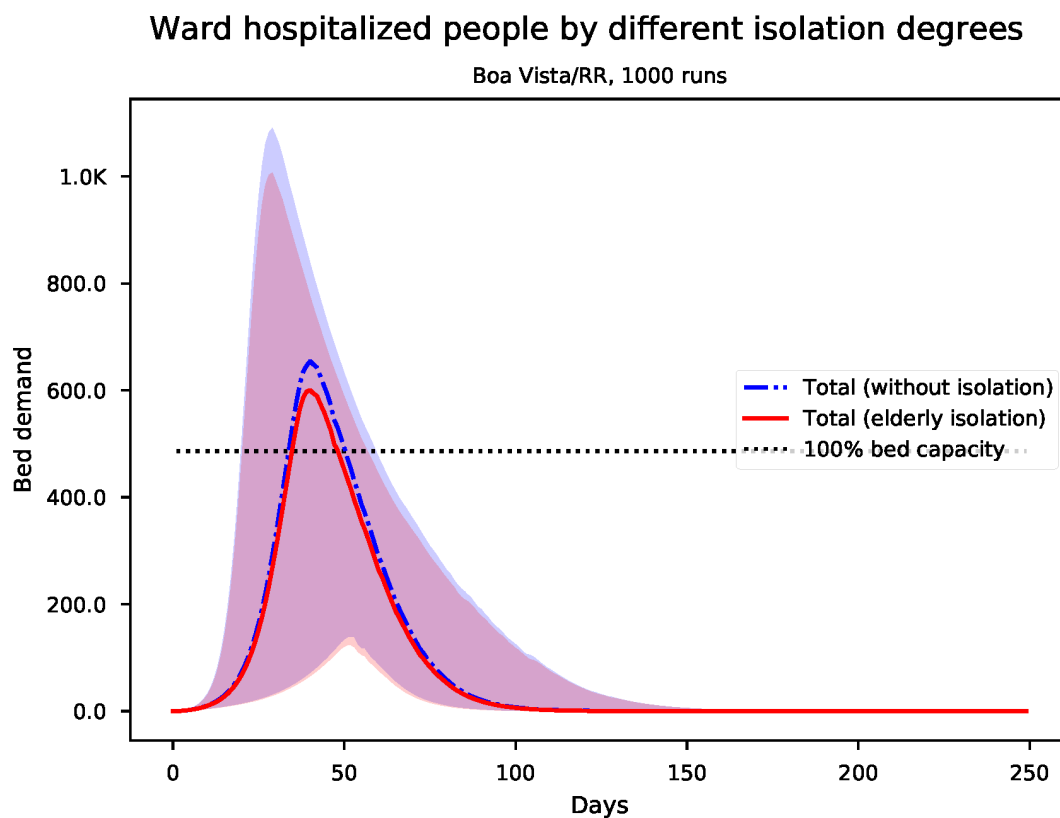

Figure S22: Predicted number of needed ward beds for Boa Vista

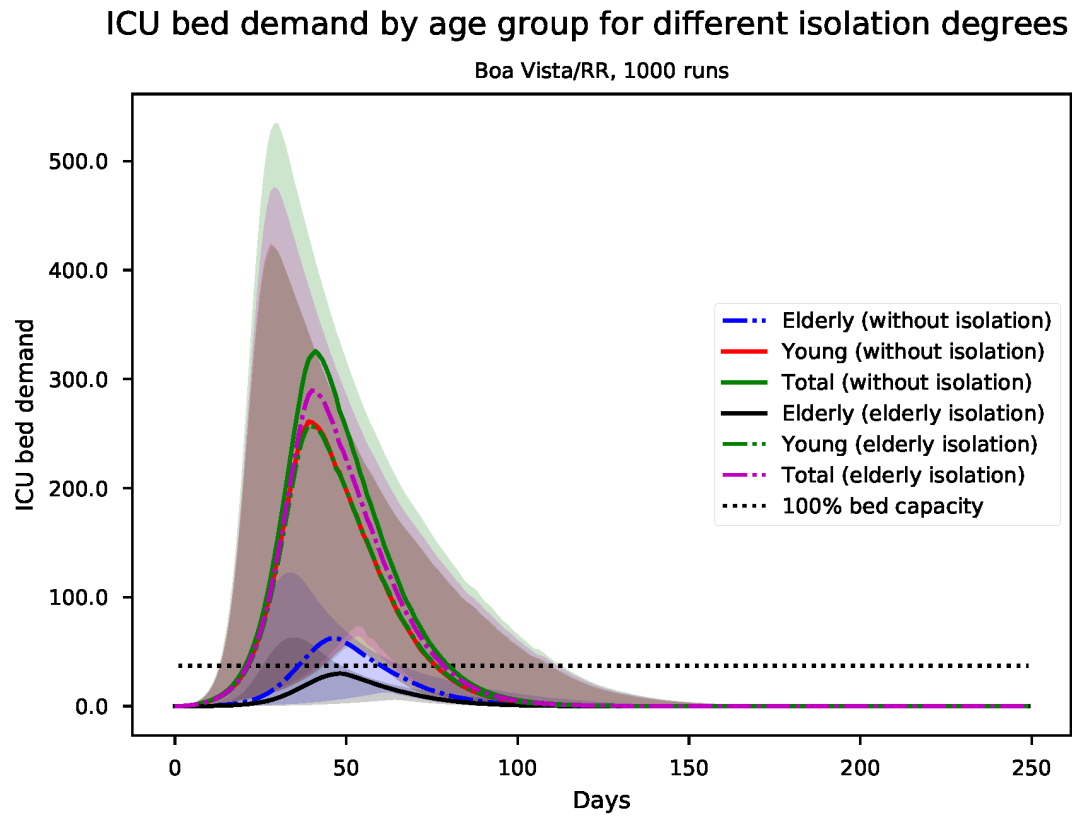

Figure S23: Predicted number of needed ICU beds, by age group for Boa Vista

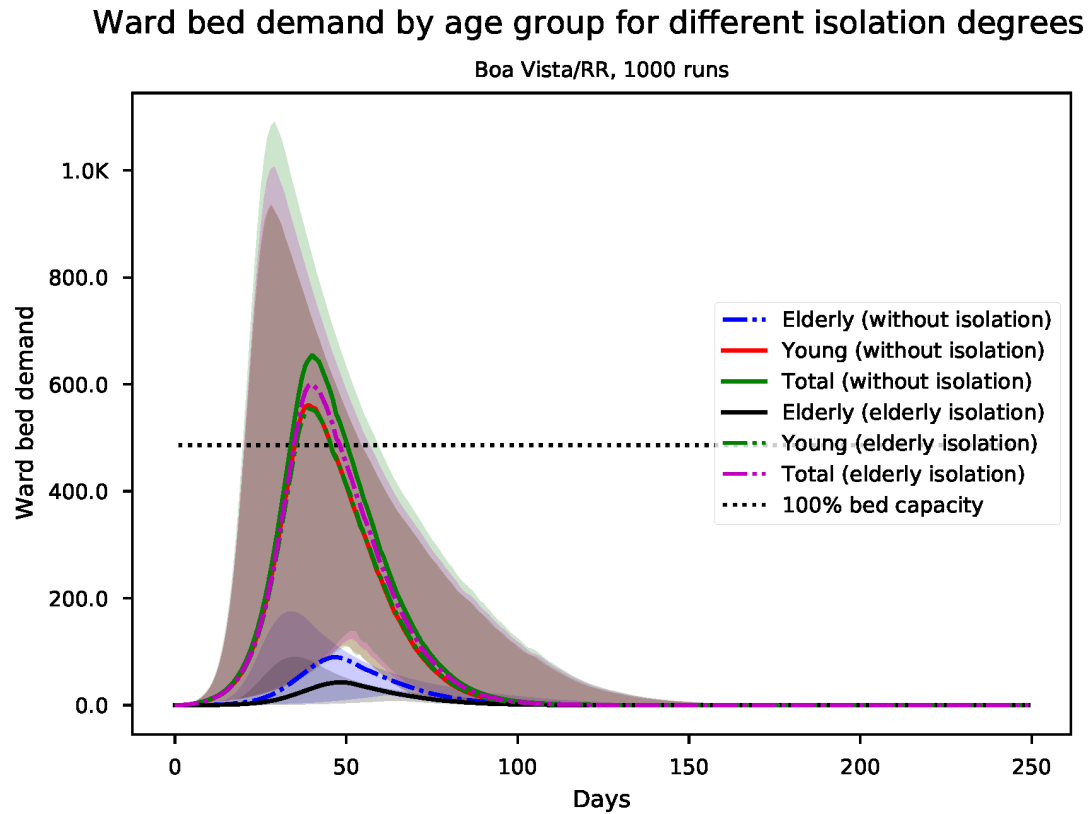

Figure S24: Predicted number of needed ward beds, by age group for Boa Vista

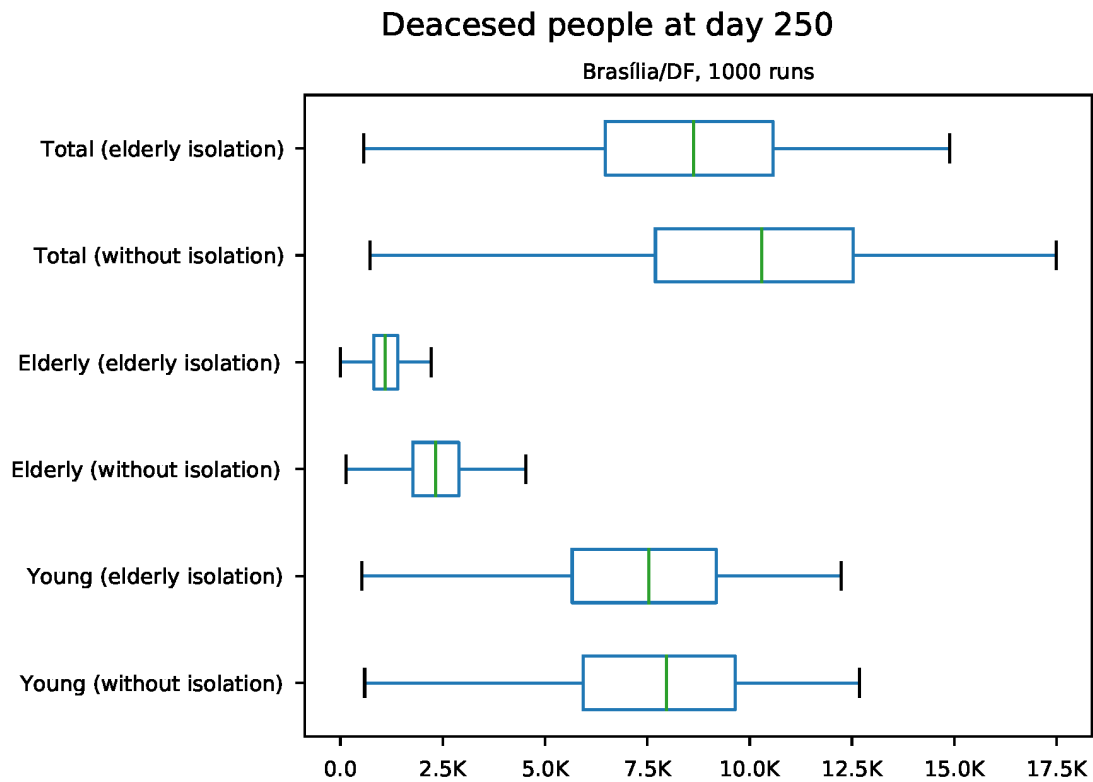

Figure S25: Predicted number of death at day 250 for Brasília

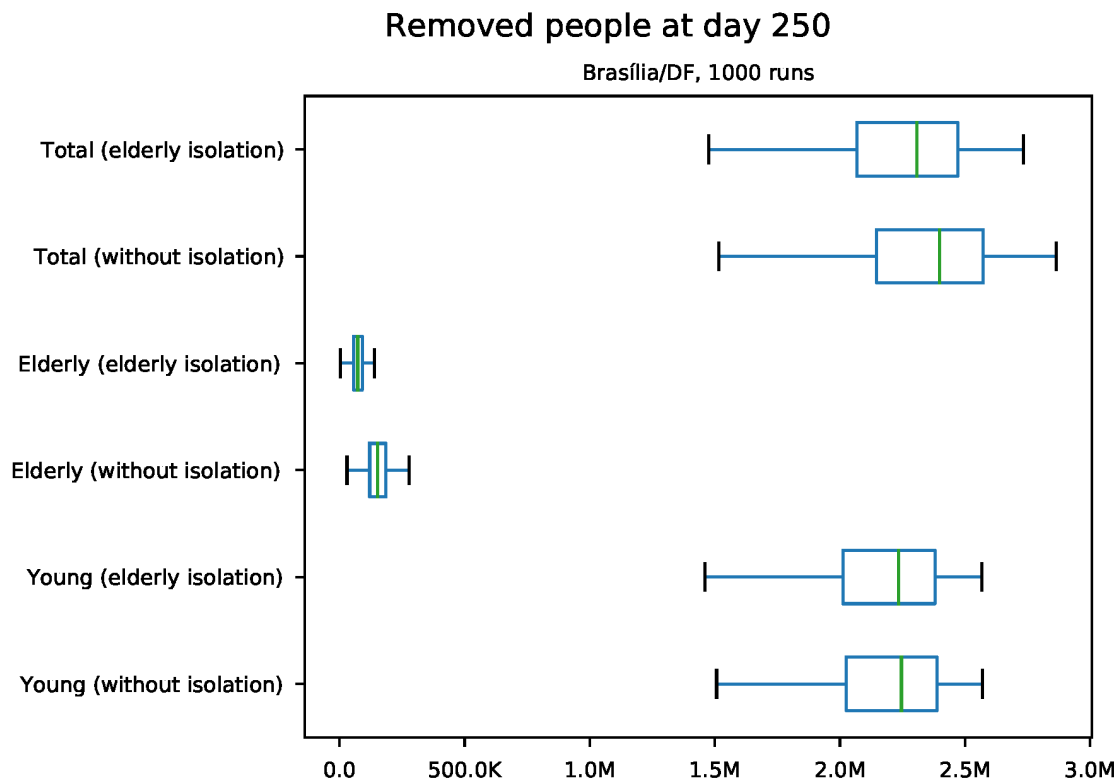

Figure S26: Predicted number of removed individuals at day 250 for Brasília

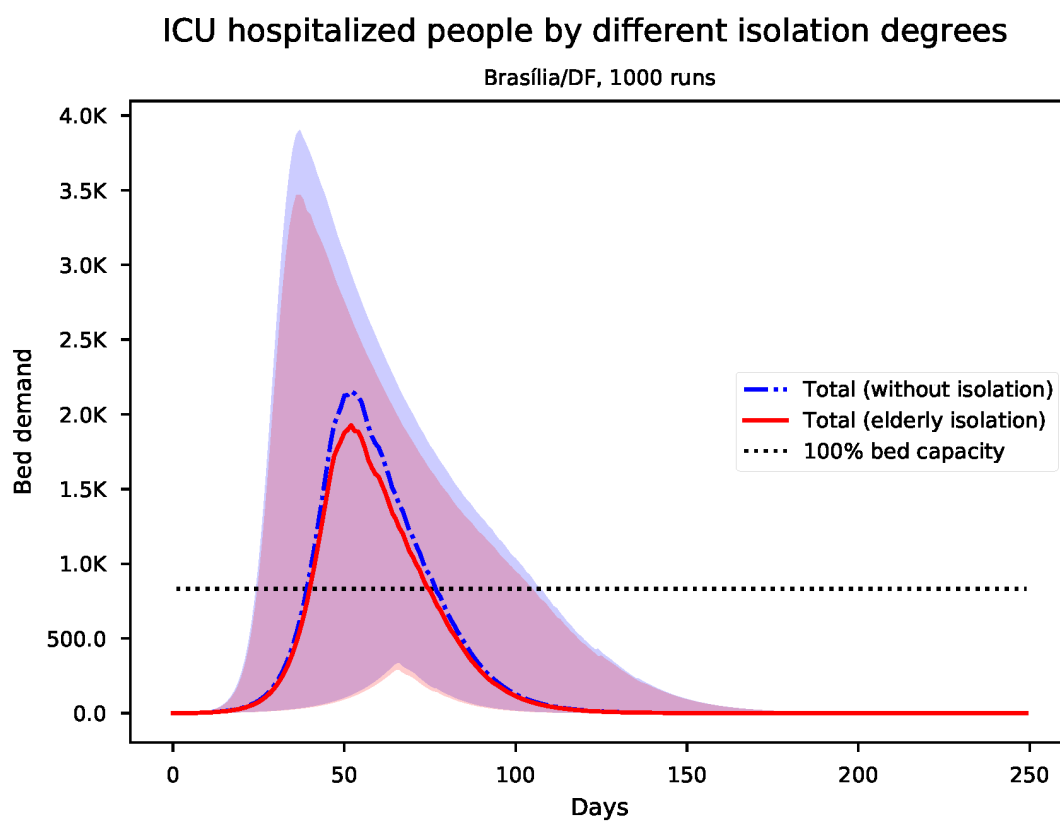

Figure S27: Predicted number of needed ICU beds for Brasília

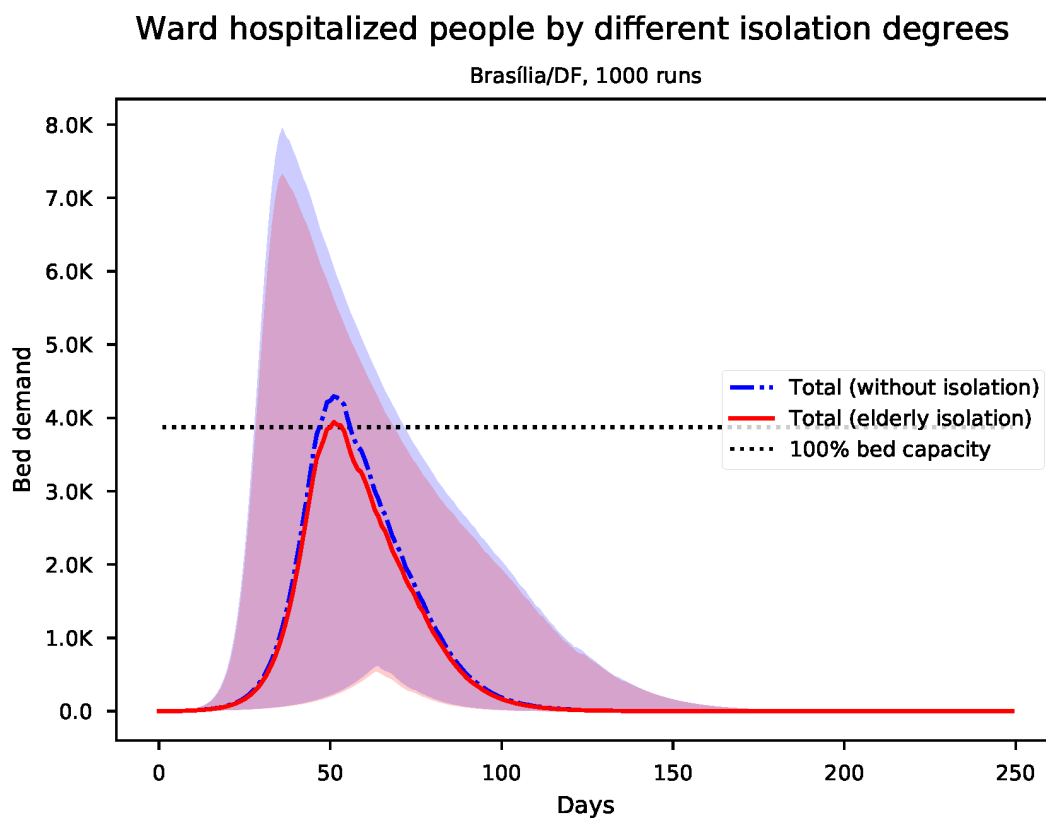

Figure S28: Predicted number of needed ward beds for Brasília

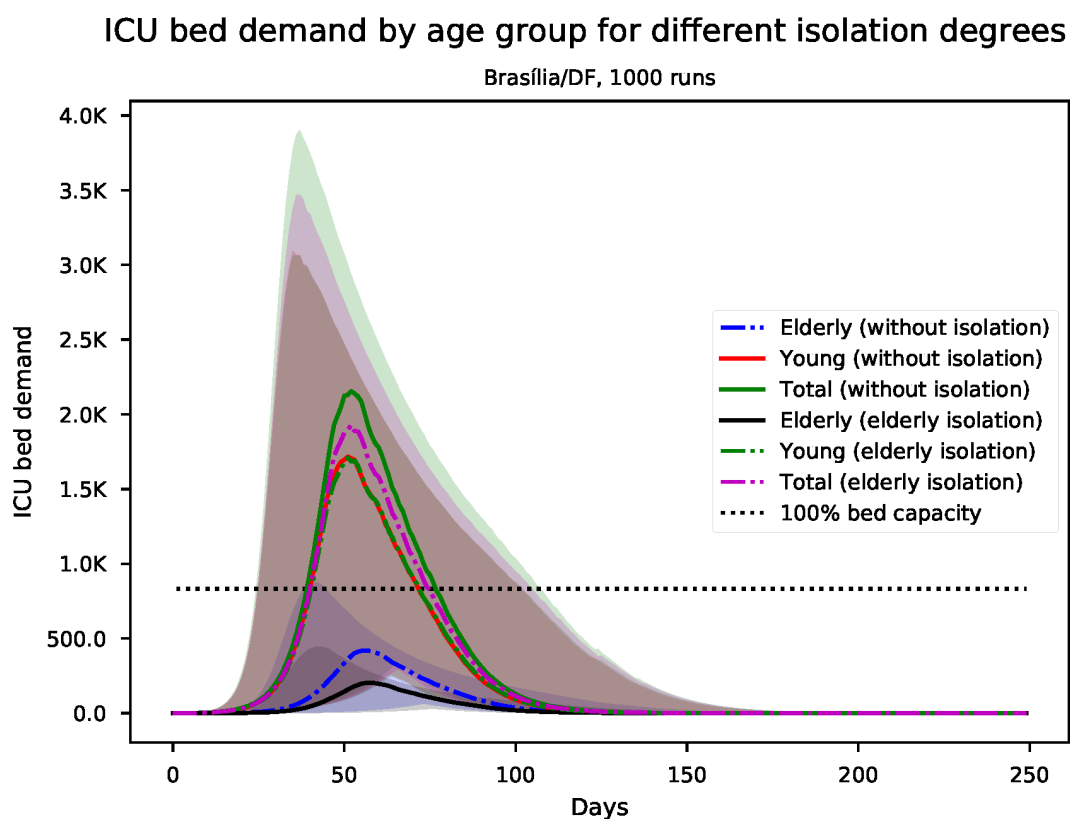

Figure S29: Predicted number of needed ICU beds, by age group for Brasília

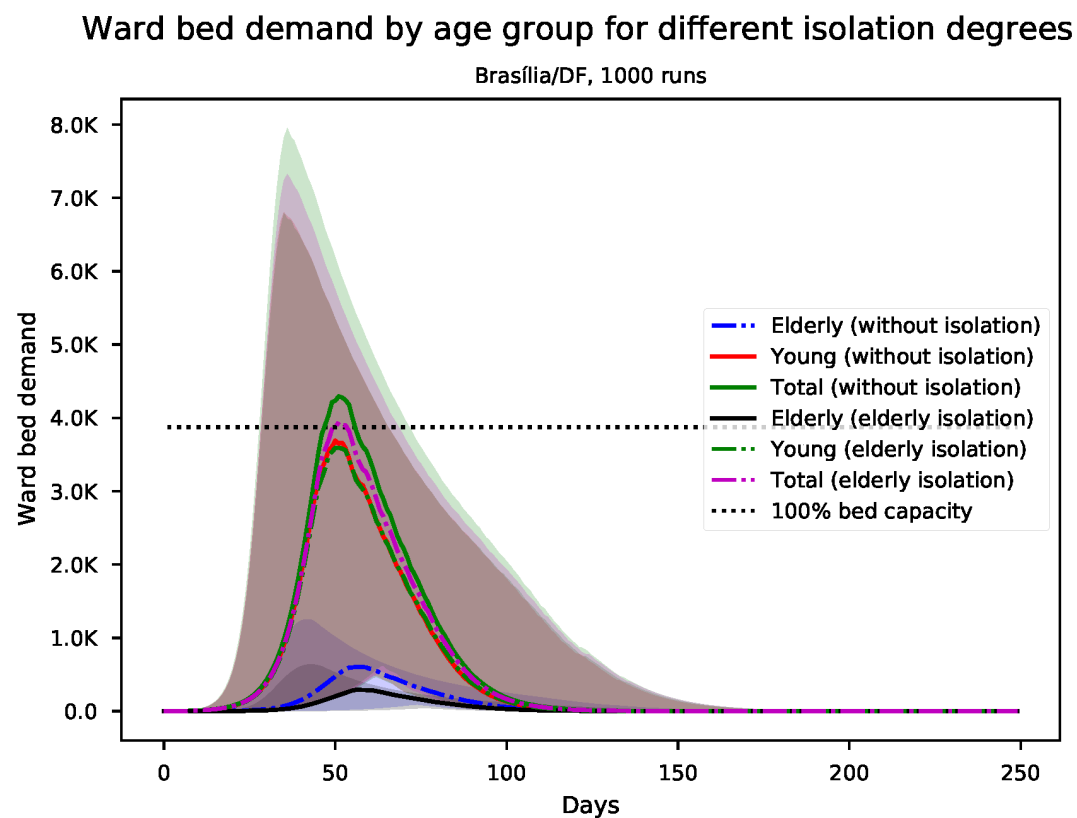

Figure S30: Predicted number of needed ward beds, by age group for Brasília

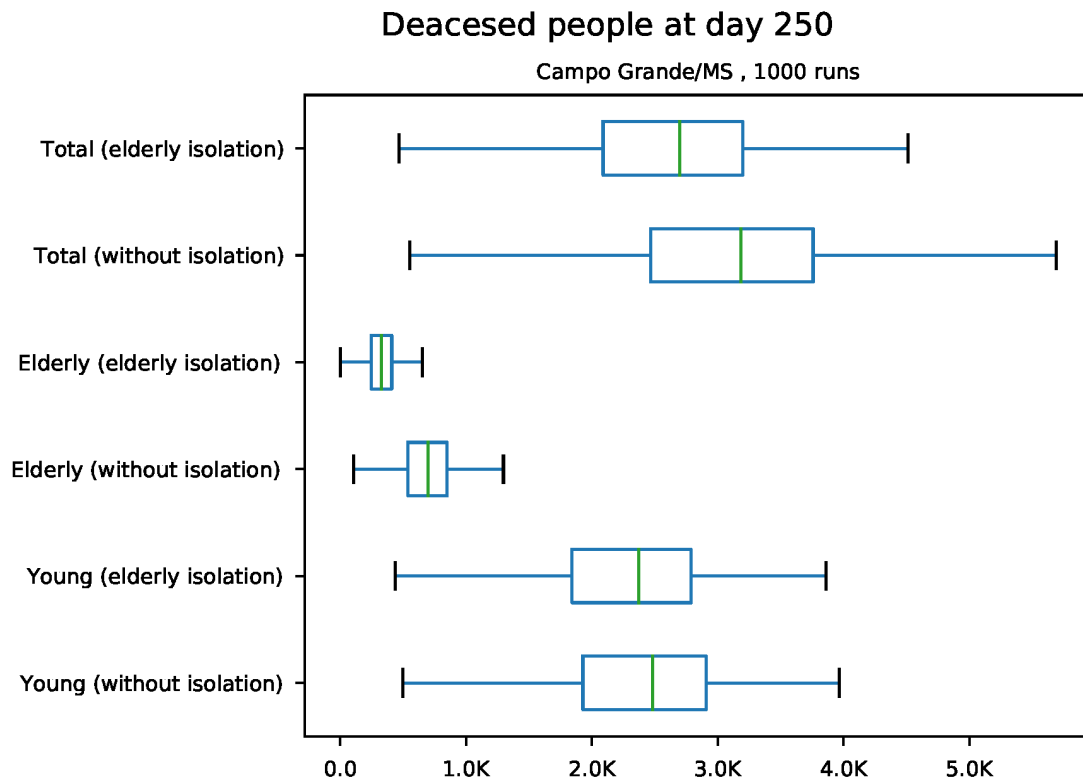

Figure S31: Predicted number of death at day 250 for Campo Grande

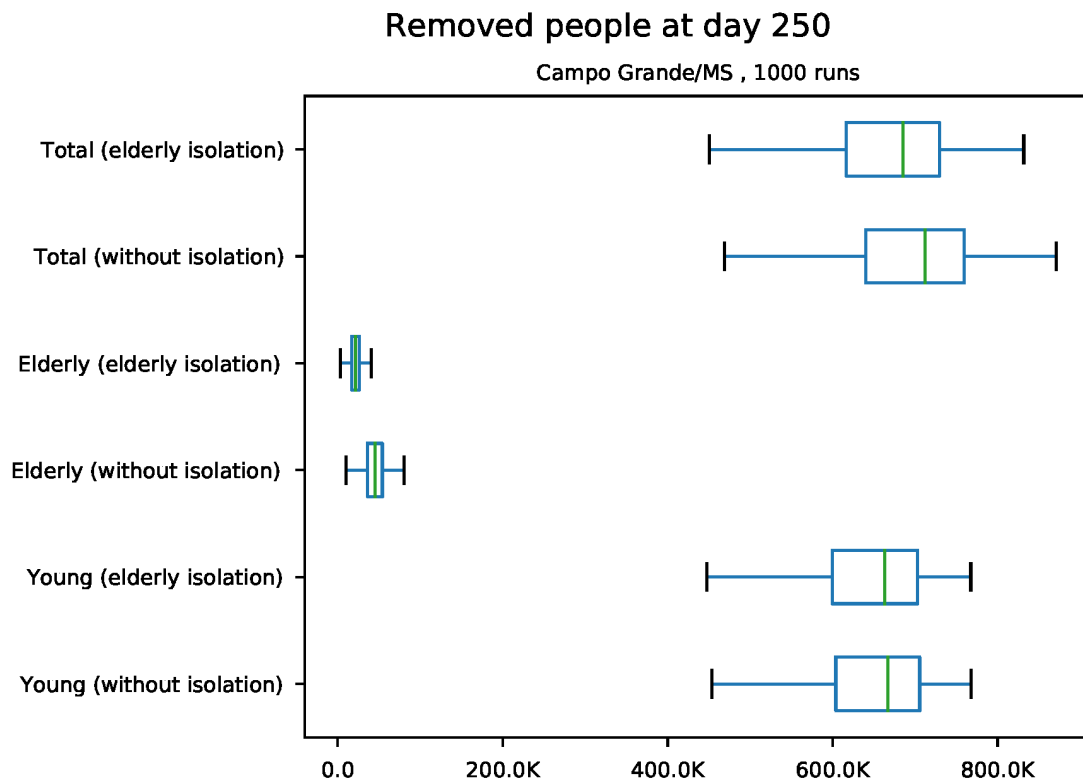

Figure S32: Predicted number of removed individuals at day 250 for Campo Grande

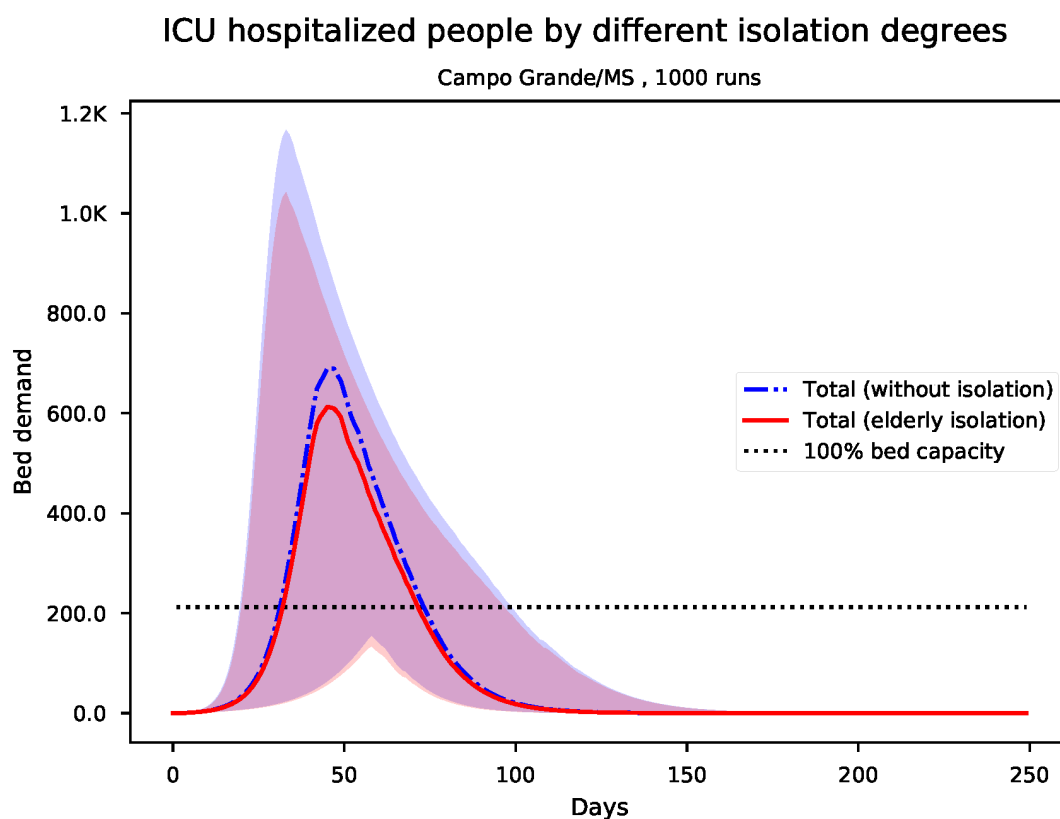

Figure S33: Predicted number of needed ICU beds for Campo Grande

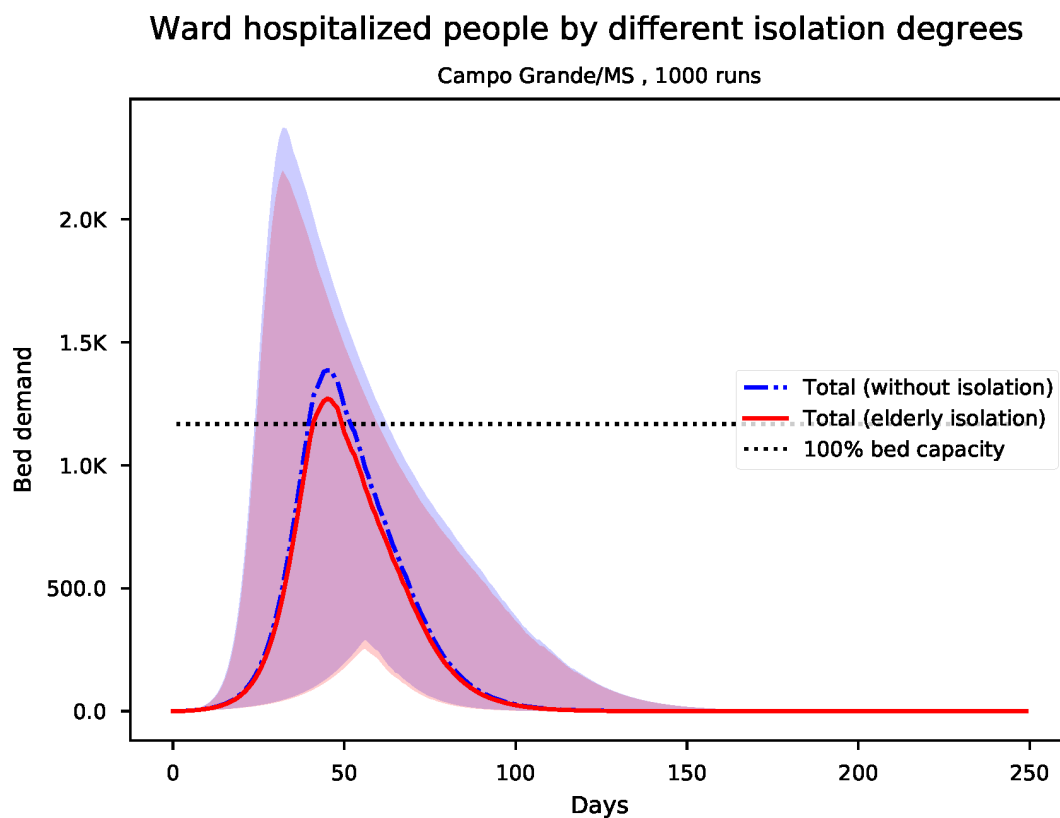

Figure S34: Predicted number of needed ward beds for Campo Grande

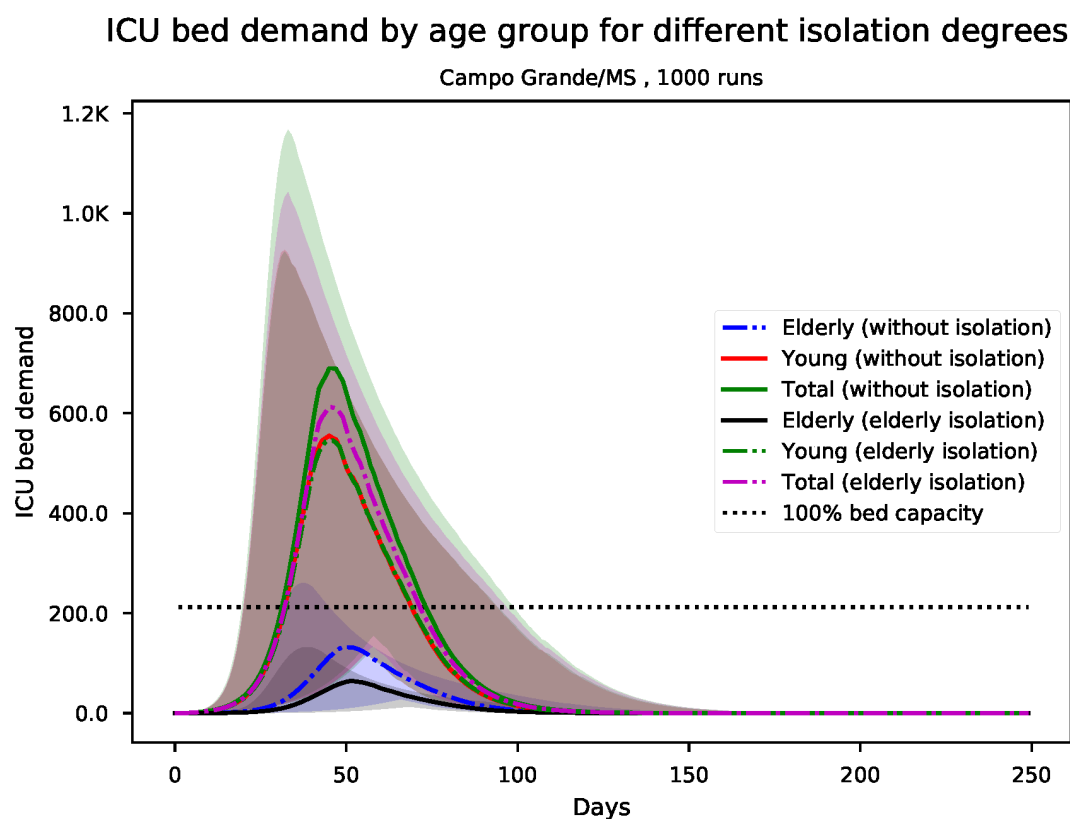

Figure S35: Predicted number of needed ICU beds, by age group for Campo Grande

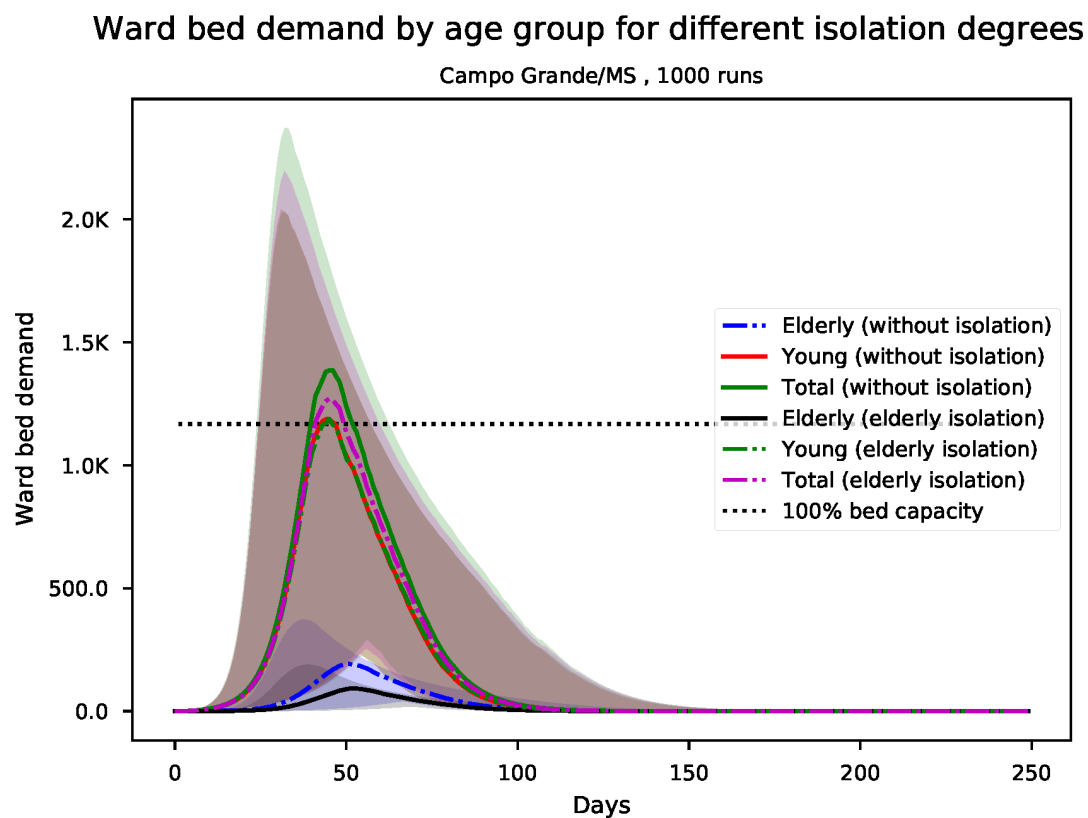

Figure S36: Predicted number of needed ward beds, by age group for Campo Grande

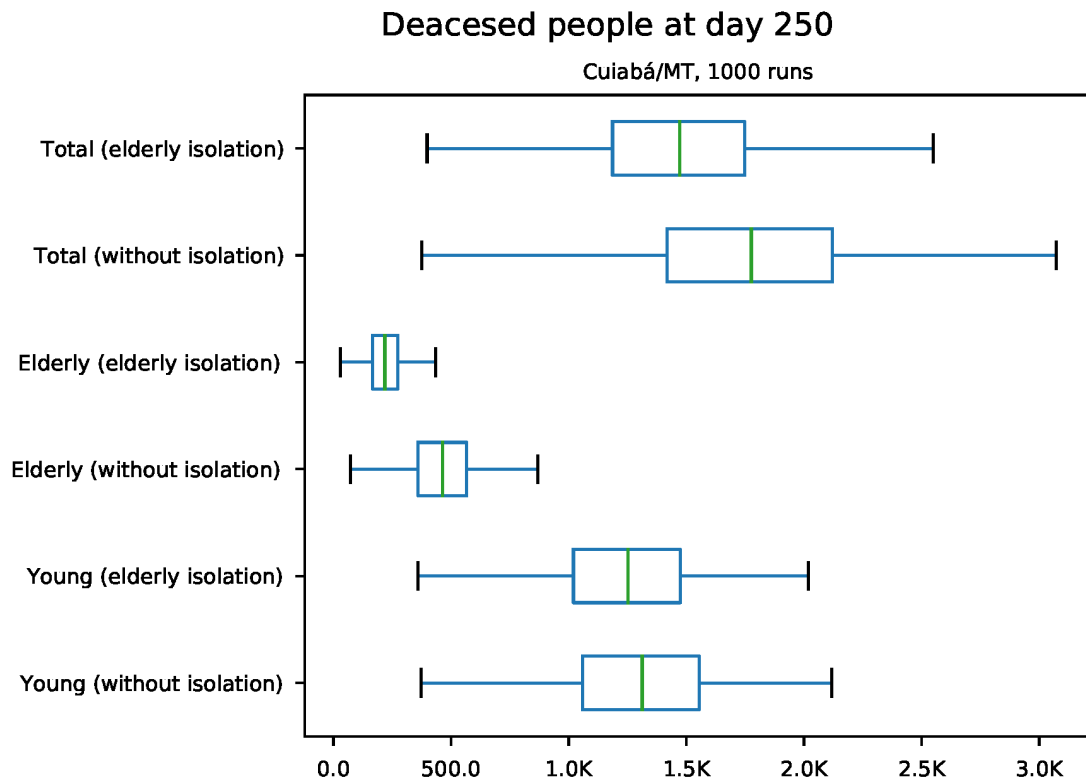

Figure S37: Predicted number of death at day 250 for Cuiabá

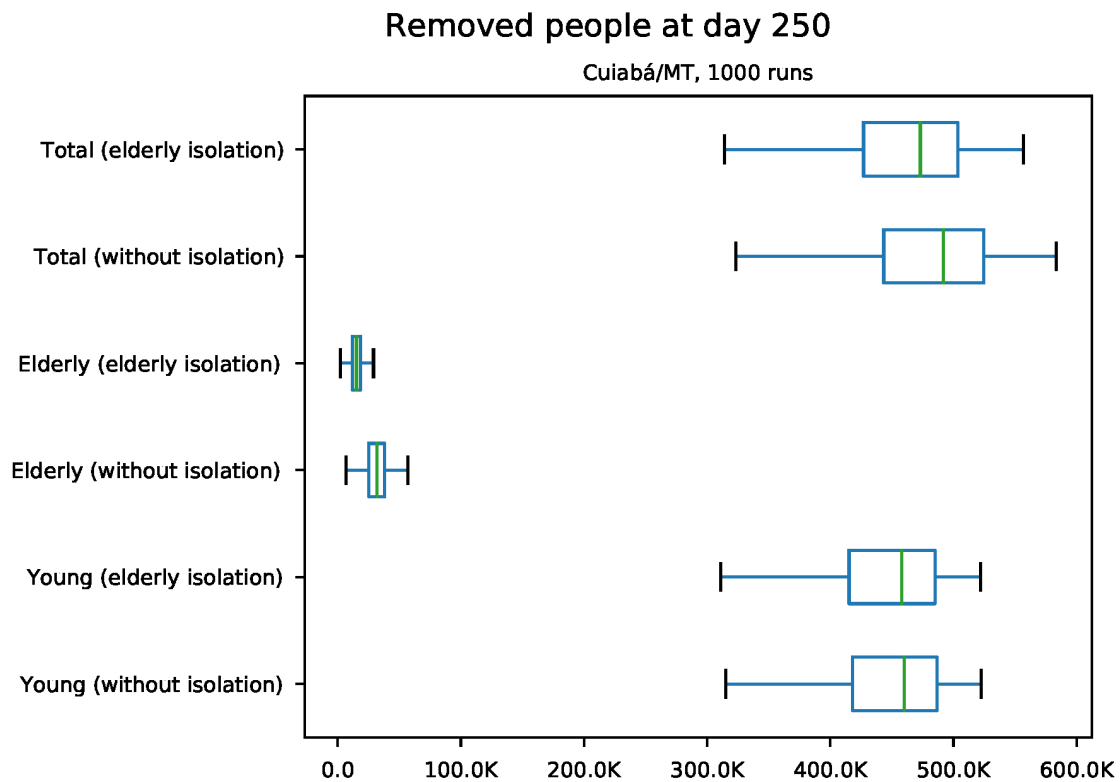

Figure S38: Predicted number of removed individuals at day 250 for Cuiabá

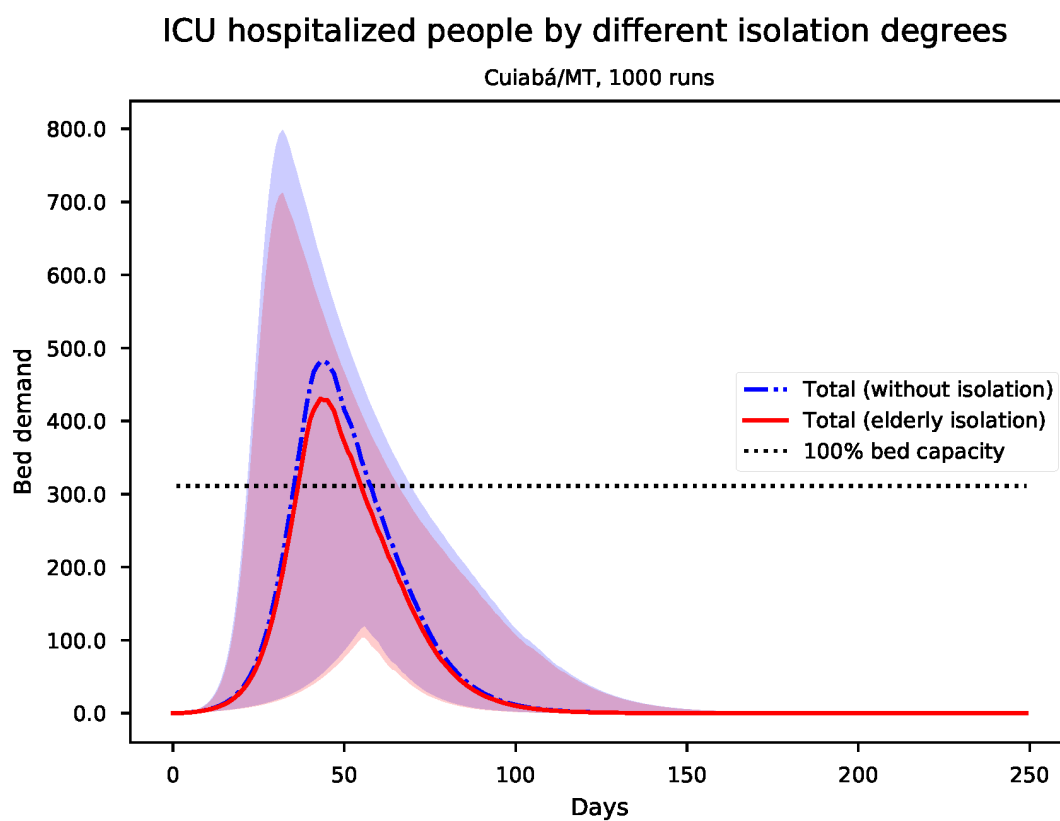

Figure S39: Predicted number of needed ICU beds for Cuiabá

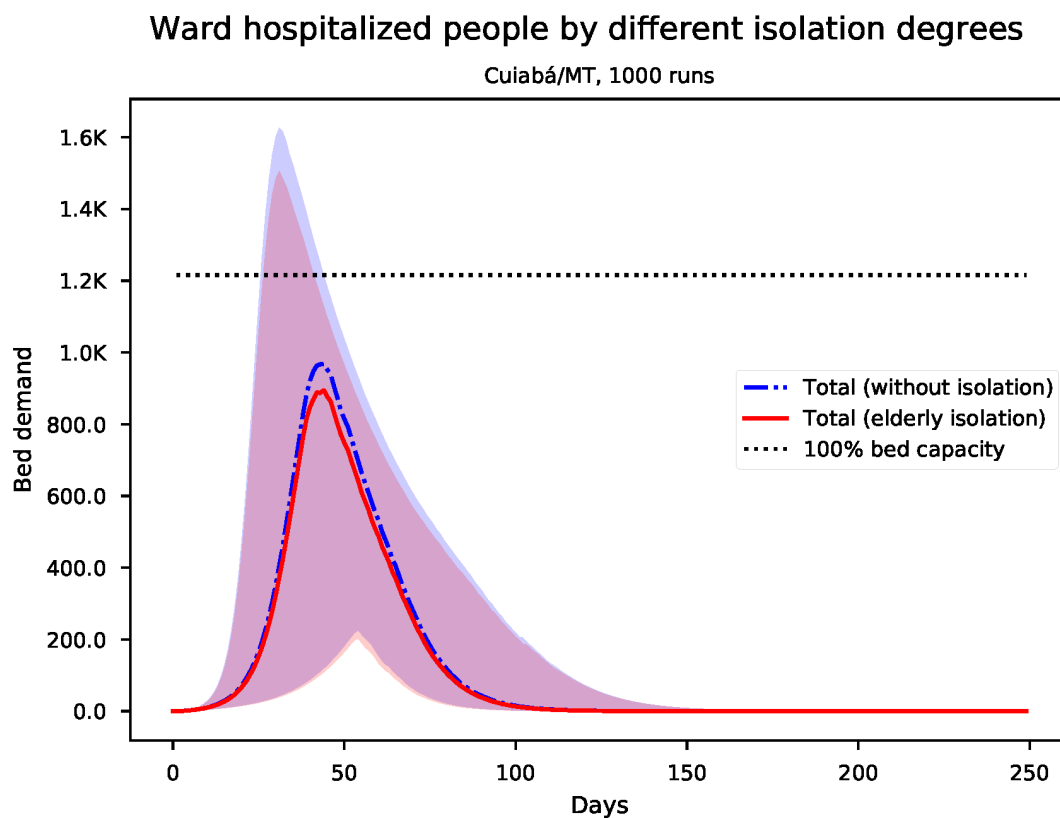

Figure S40: Predicted number of needed ward beds for Cuiabá

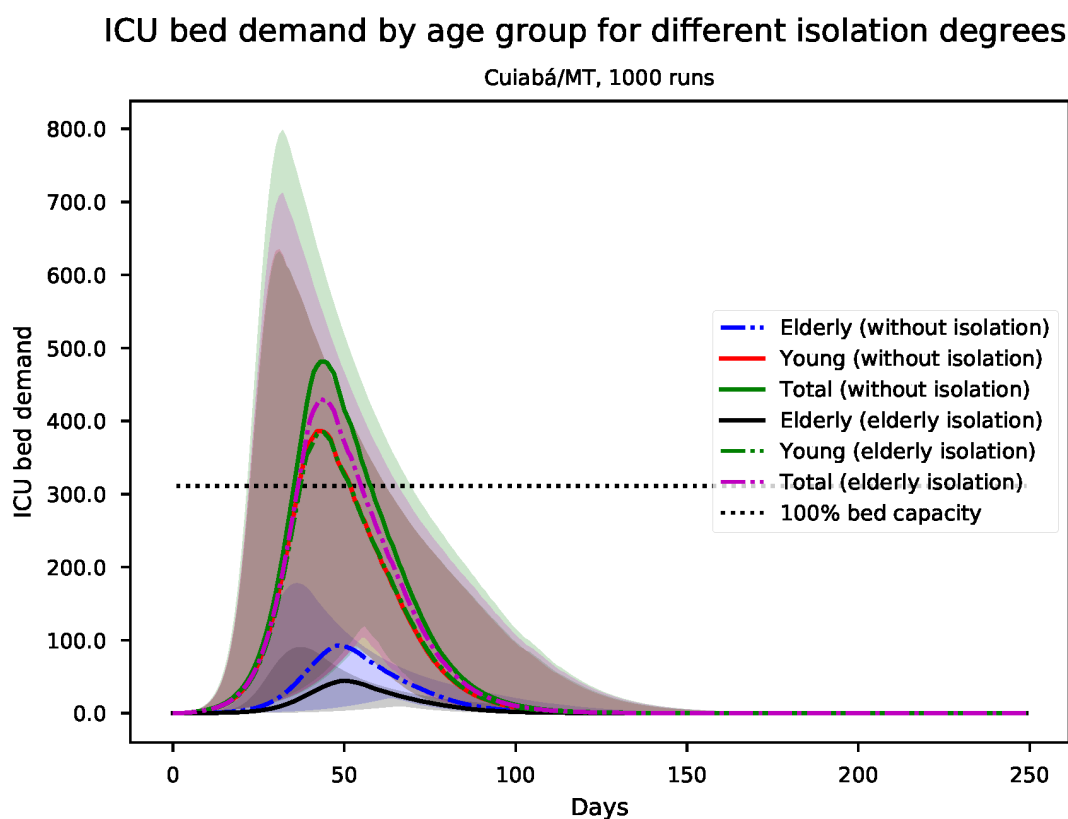

Figure S41: Predicted number of needed ICU beds, by age group for Cuiabá

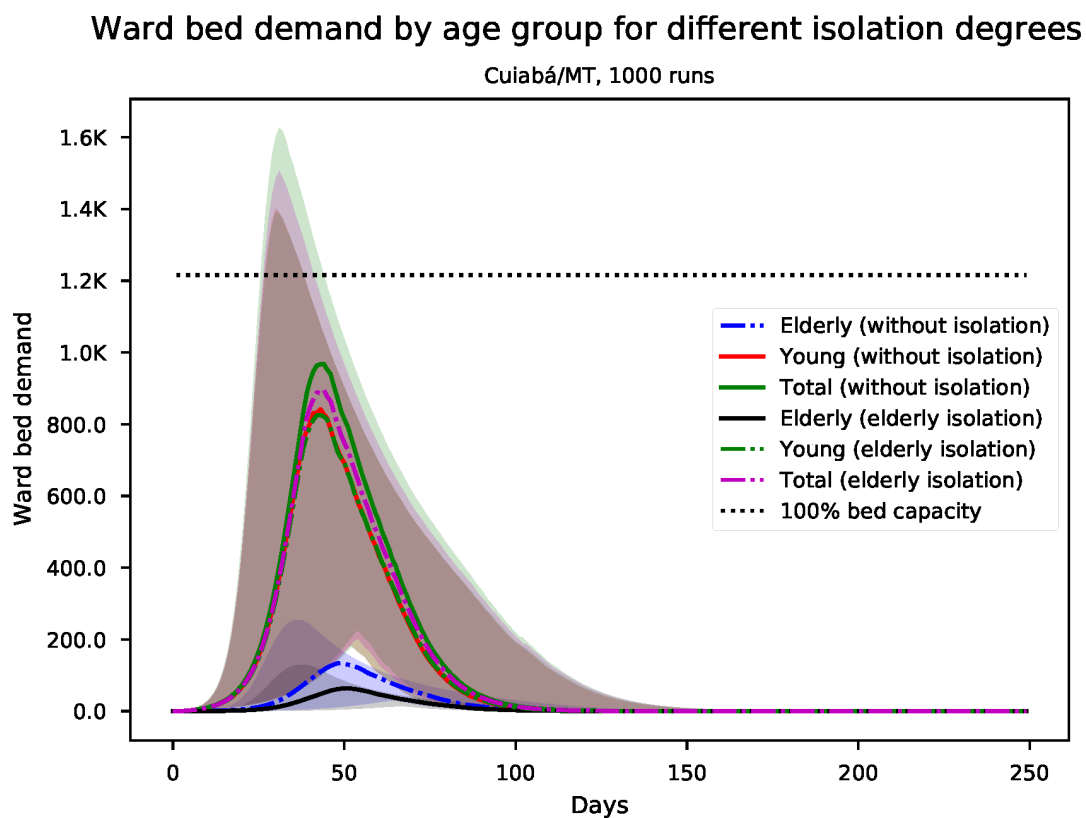

Figure S42: Predicted number of needed ward beds, by age group for Cuiabá

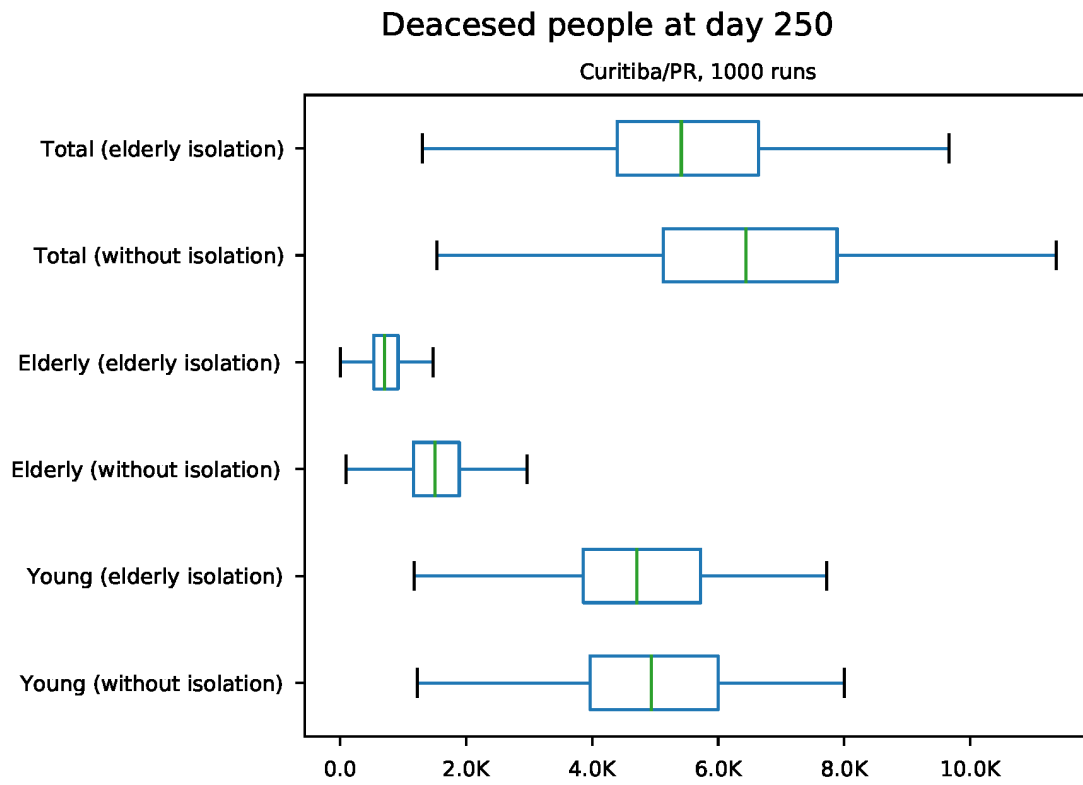

Figure S43: Predicted number of death at day 250 for Curitiba

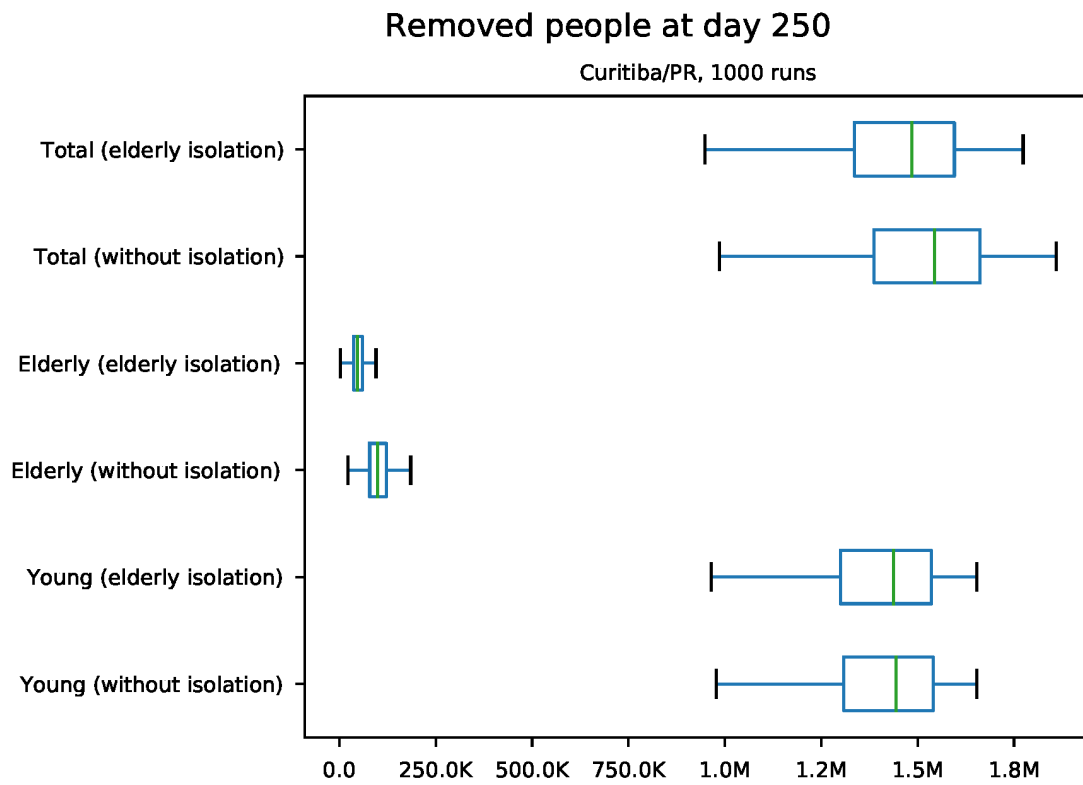

Figure S44: Predicted number of removed individuals at day 250 for Curitiba

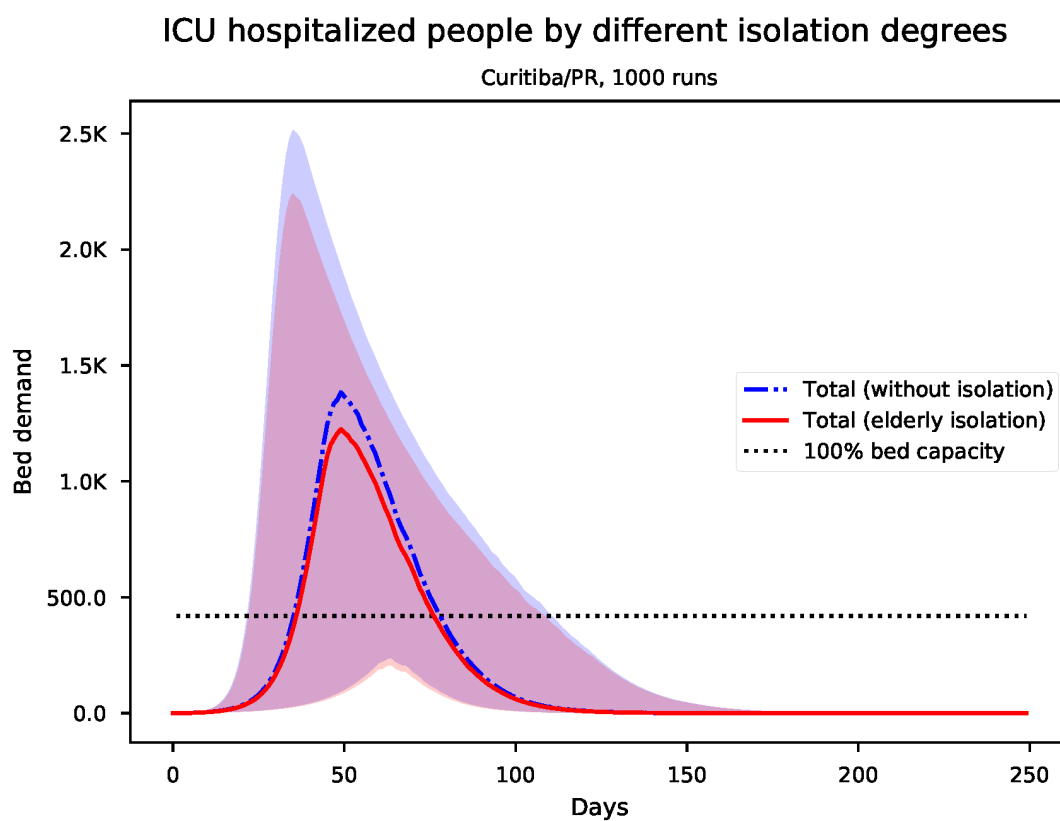

Figure S45: Predicted number of needed ICU beds for Curitiba

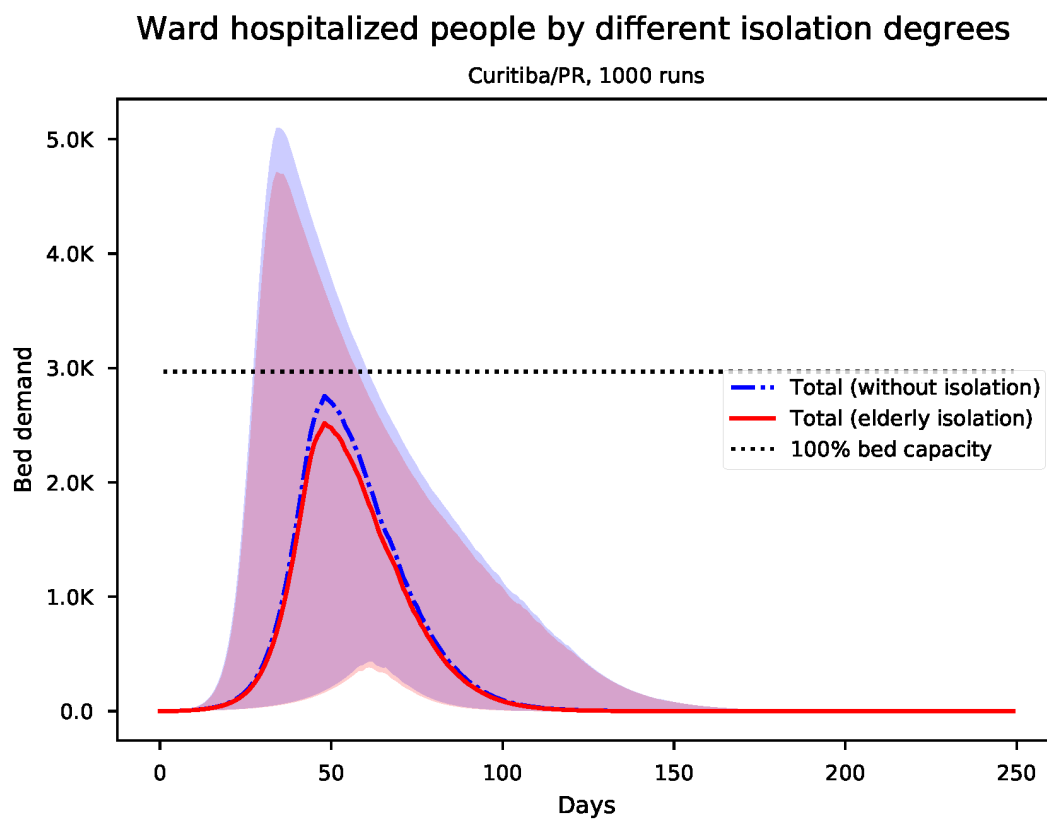

Figure S46: Predicted number of needed ward beds for Curitiba

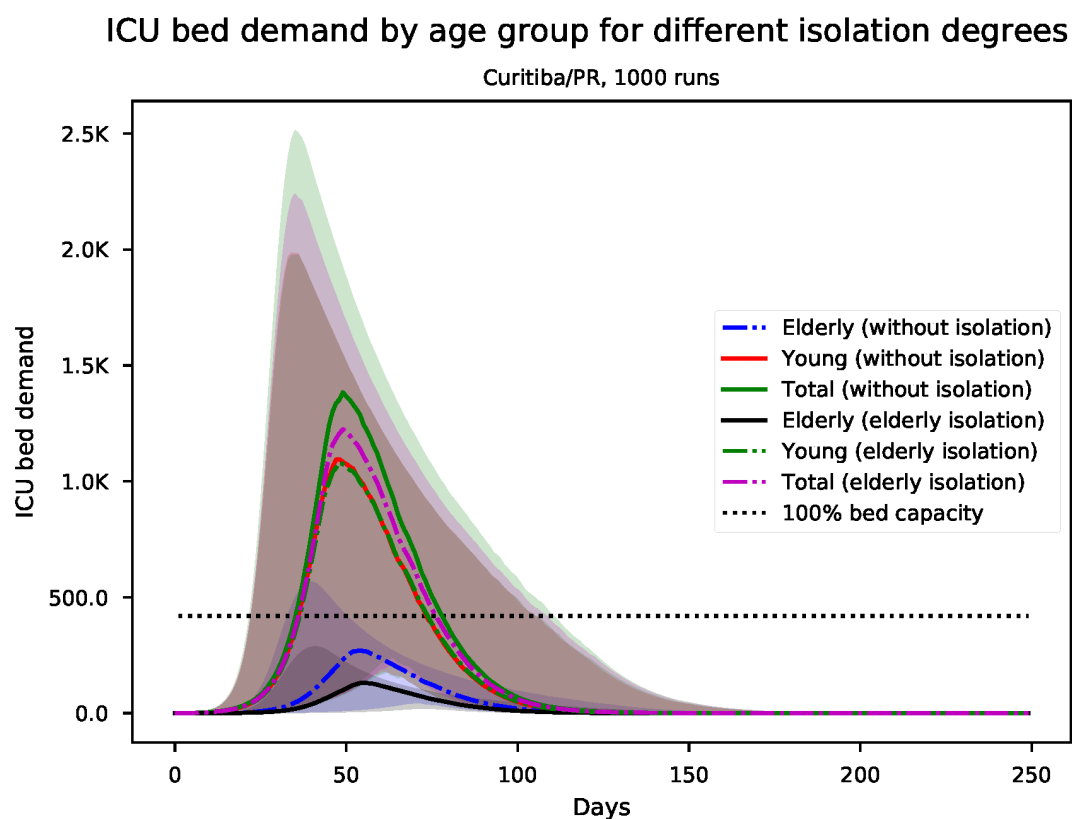

Figure S47: Predicted number of needed ICU beds, by age group for Curitiba

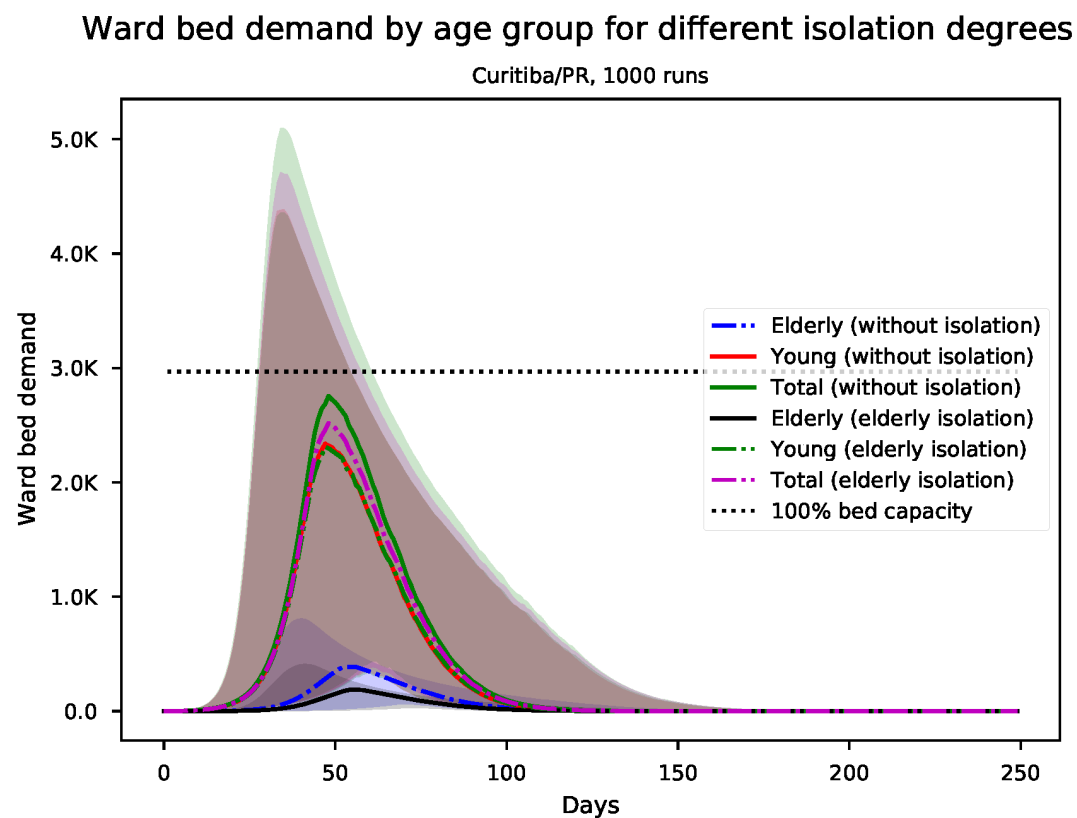

Figure S48: Predicted number of needed ward beds, by age group for Curitiba

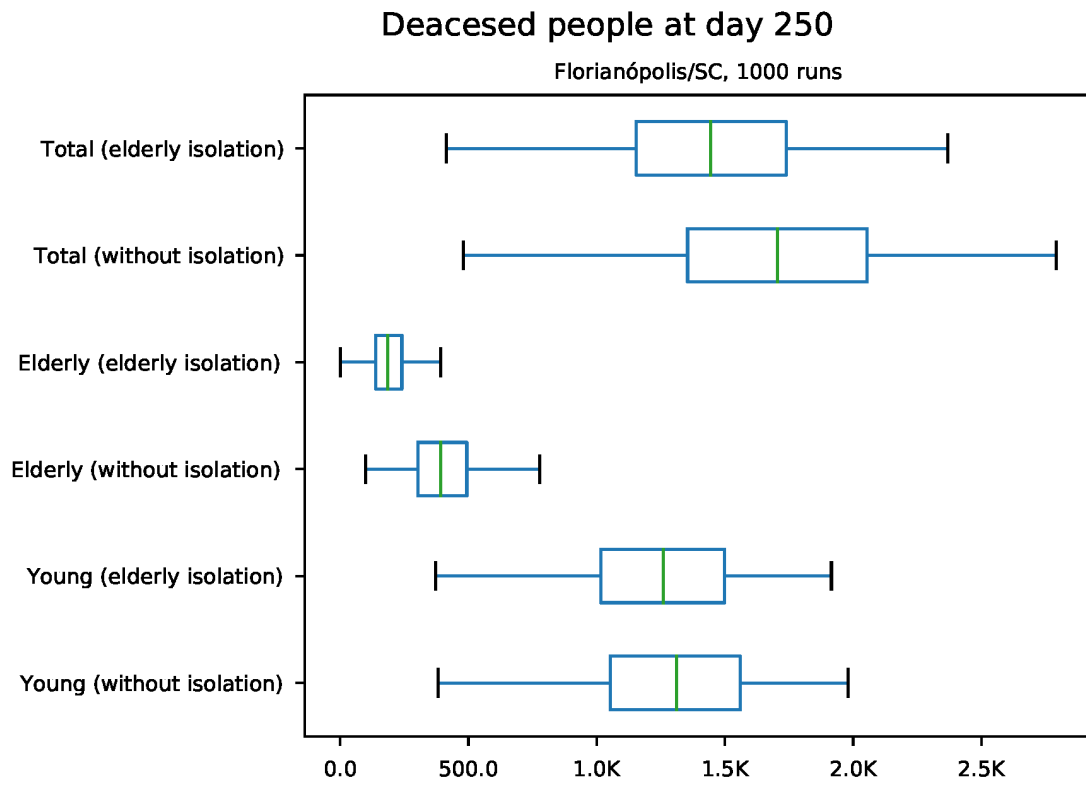

Figure S49: Predicted number of death at day 250 for Florianópolis

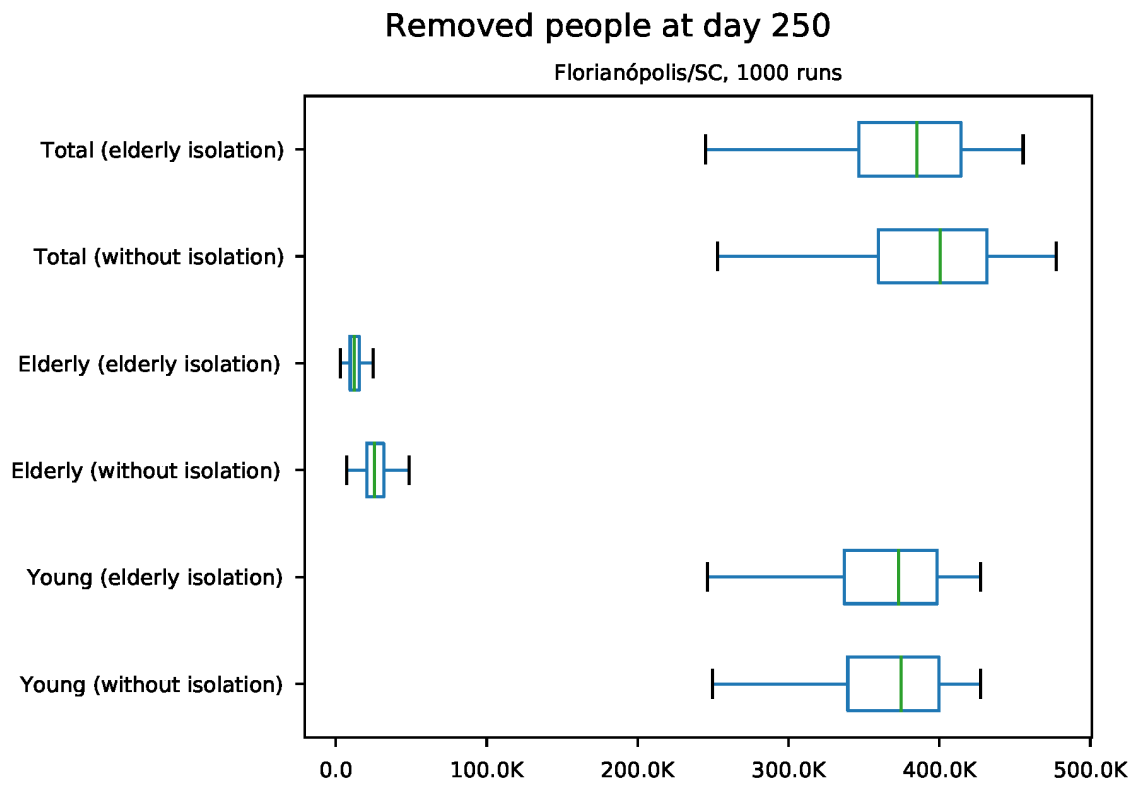

Figure S50: Predicted number of removed individuals at day 250 for Florianópolis

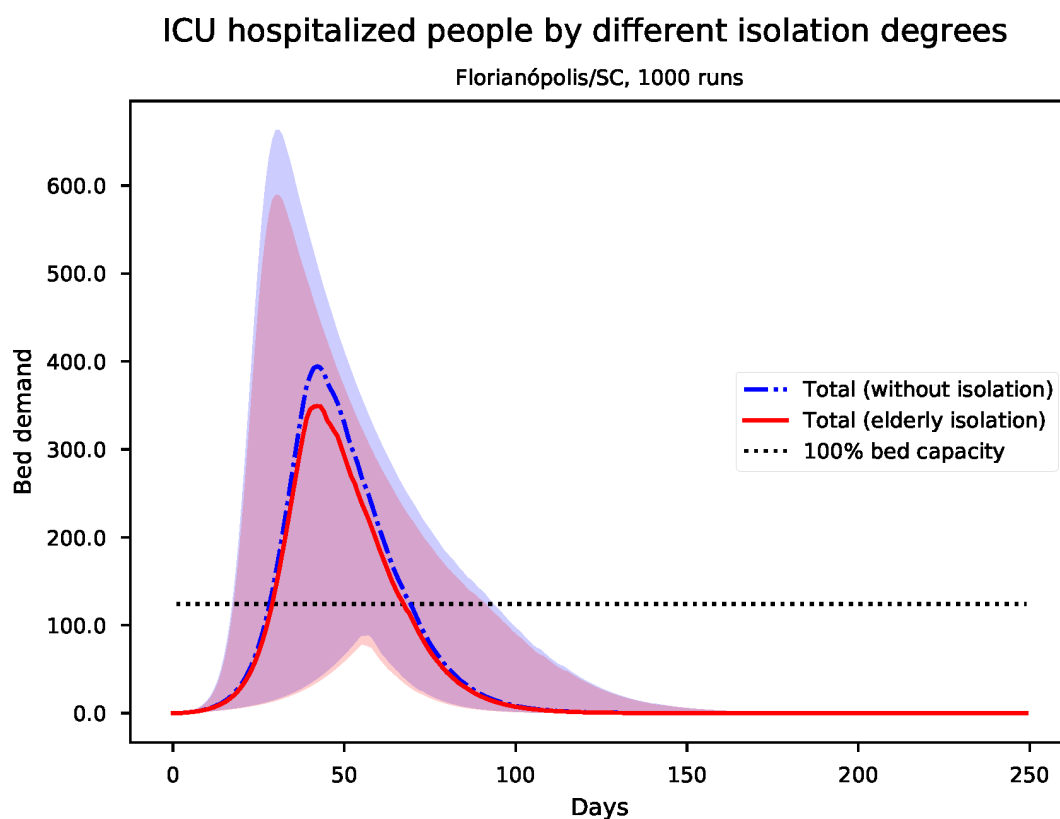

Figure S51: Predicted number of needed ICU beds for Florianópolis

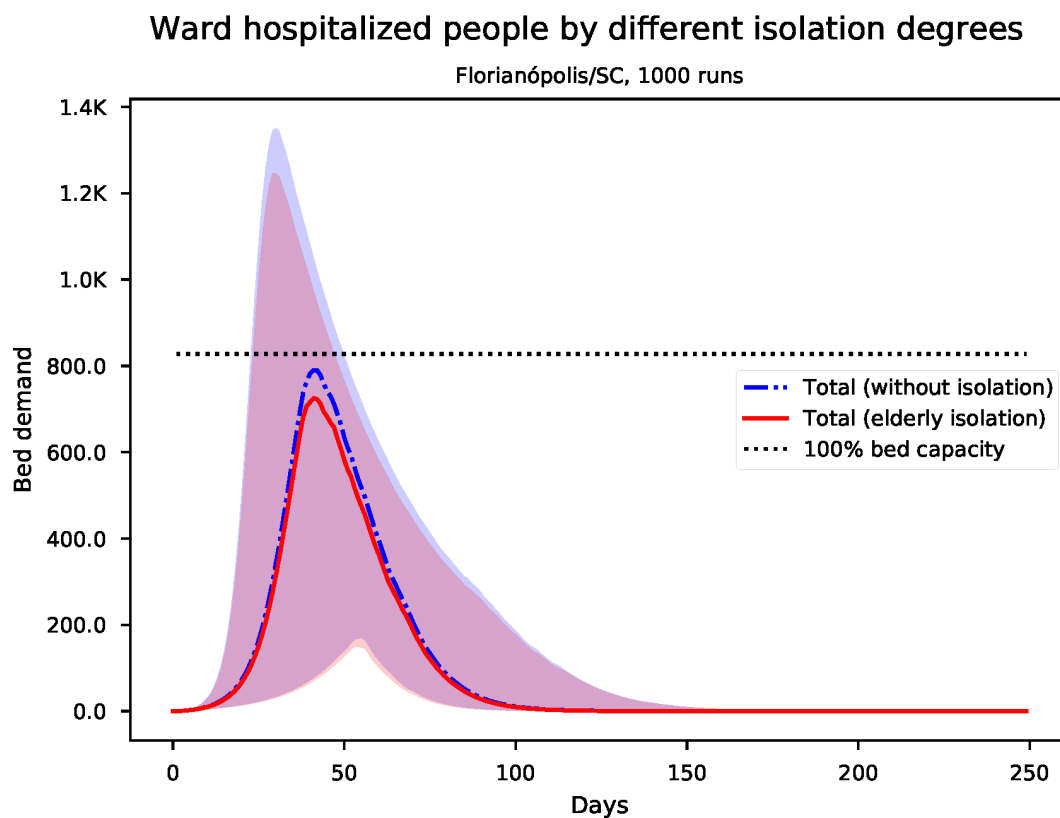

Figure S52: Predicted number of needed ward beds for Florianópolis

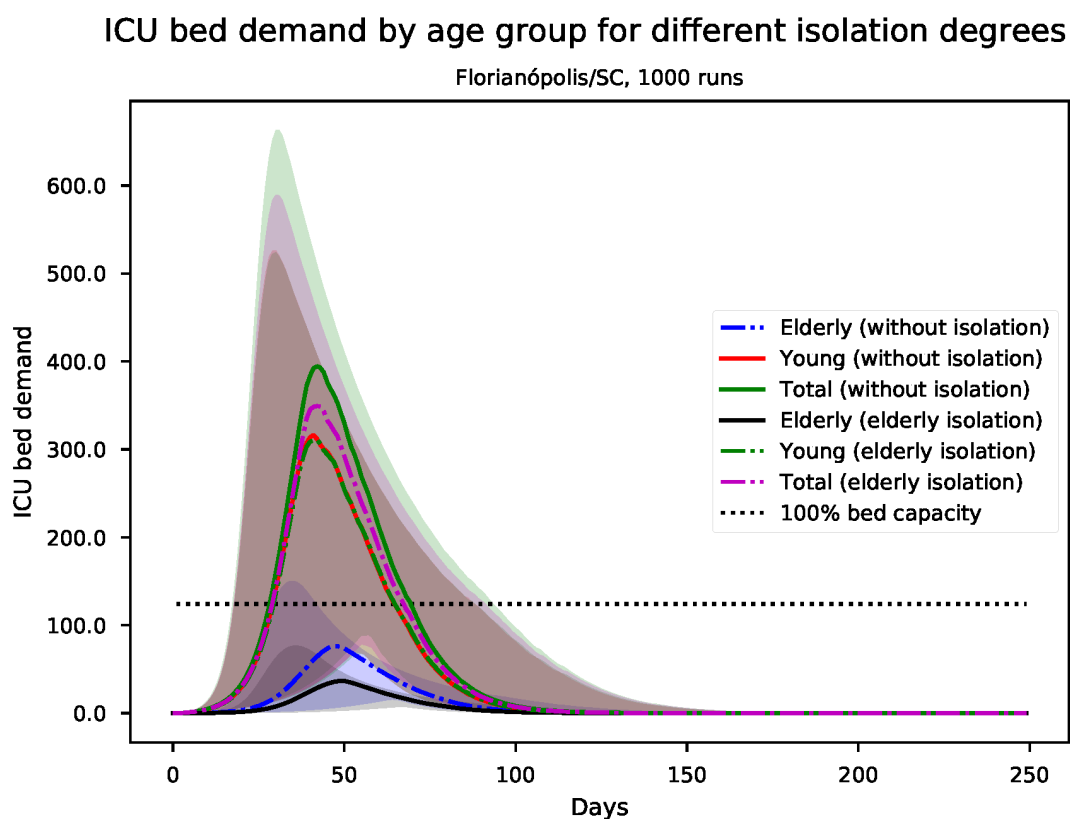

Figure S53: Predicted number of needed ICU beds, by age group for Florianópolis

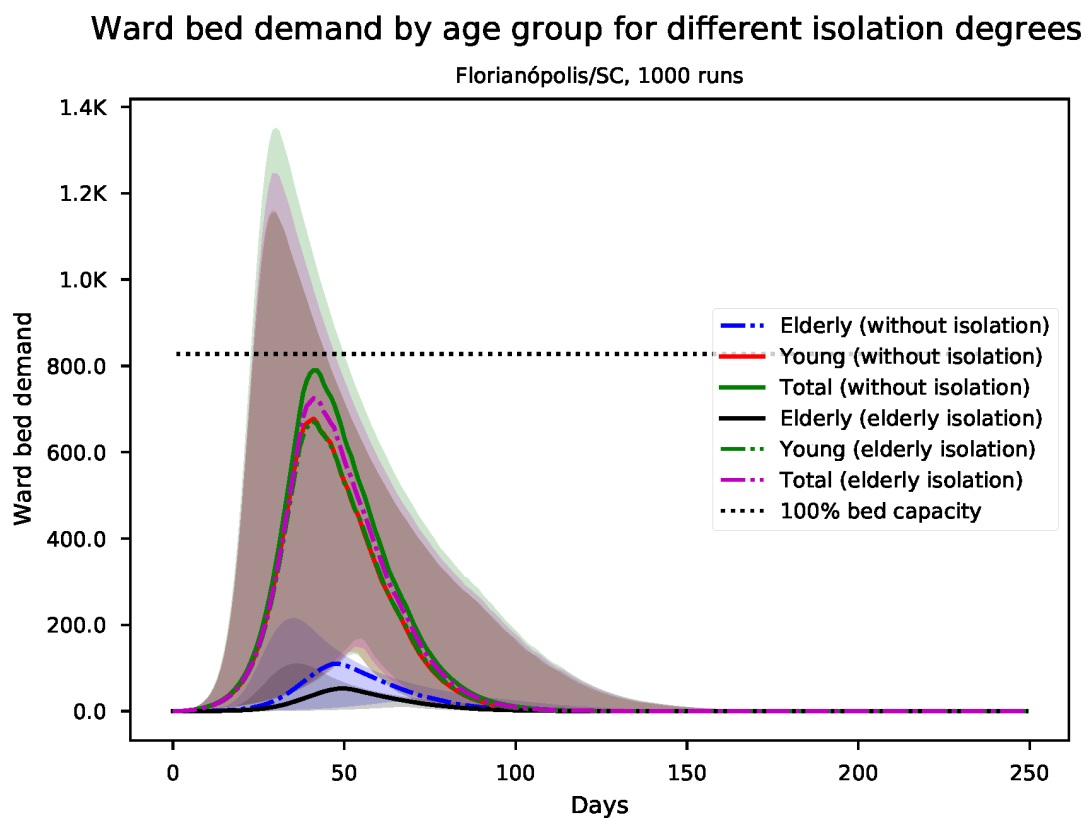

Figure S54: Predicted number of needed ward beds, by age group for Florianópolis

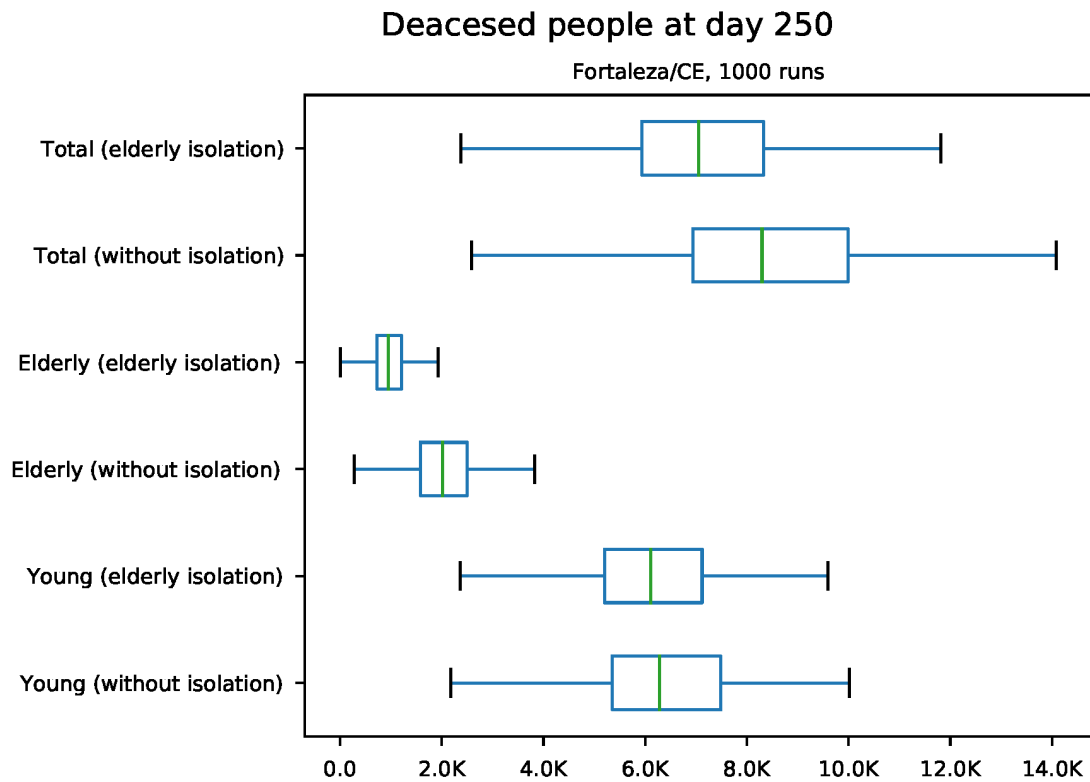

Figure S55: Predicted number of death at day 250 for Fortaleza

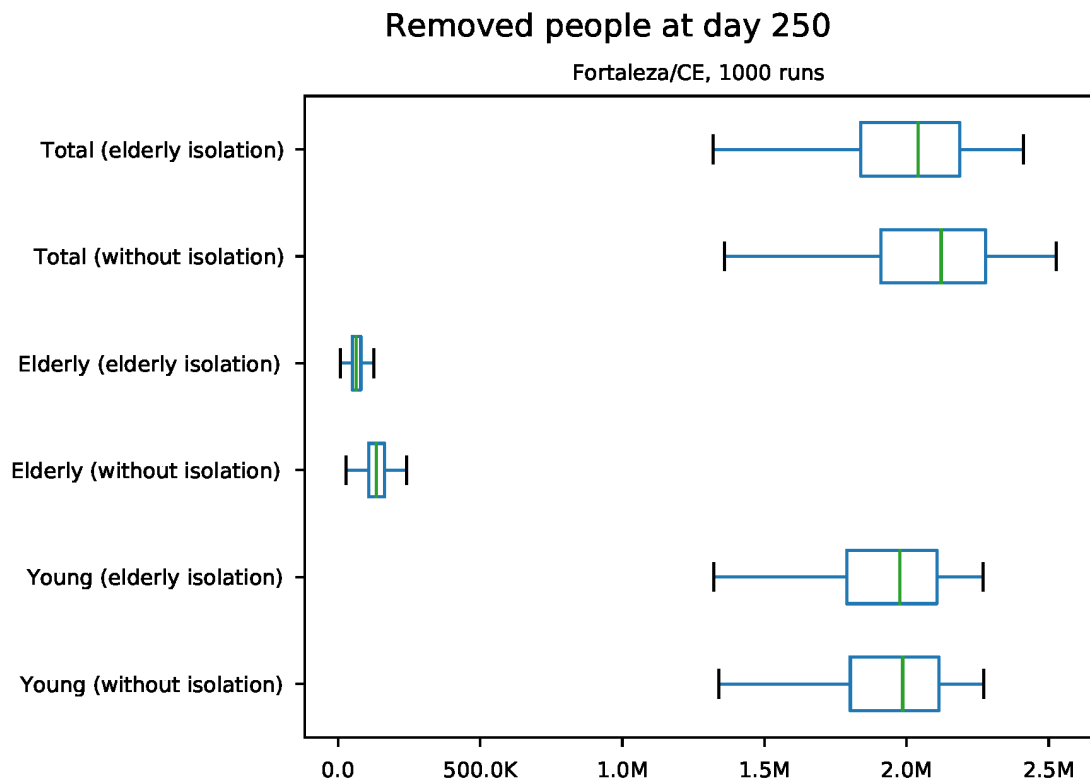

Figure S56: Predicted number of removed individuals at day 250 for Fortaleza

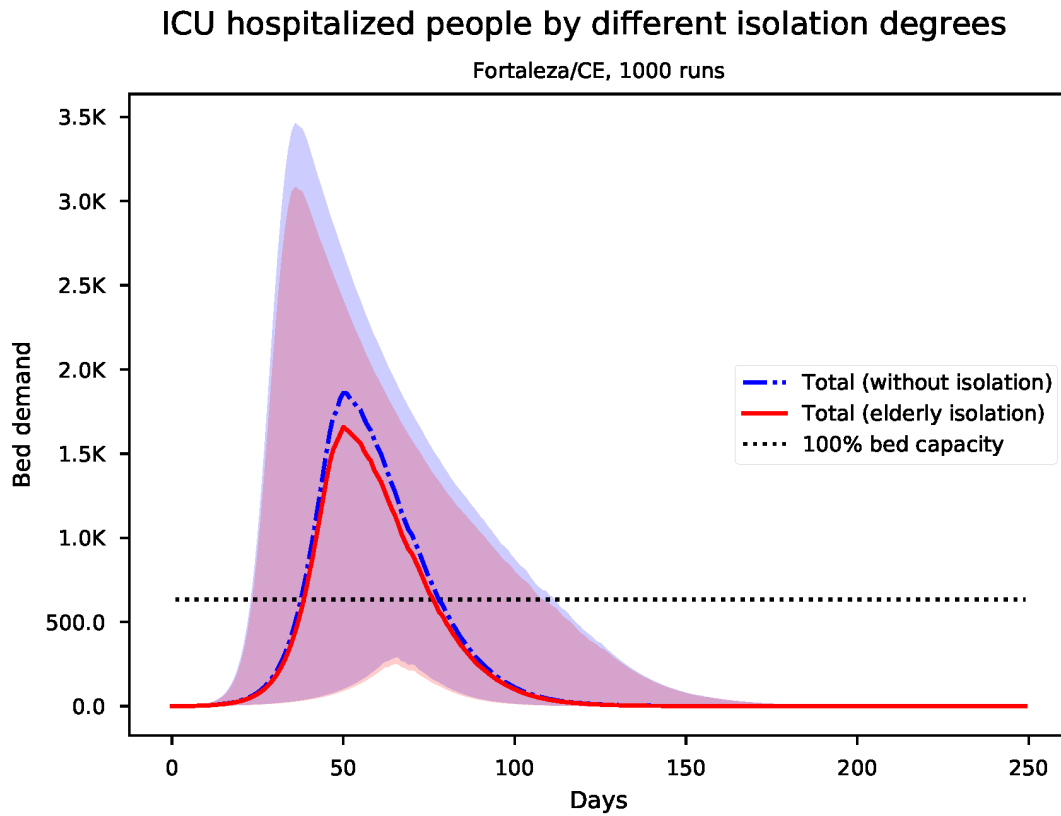

Figure S57: Predicted number of needed ICU beds for Fortaleza

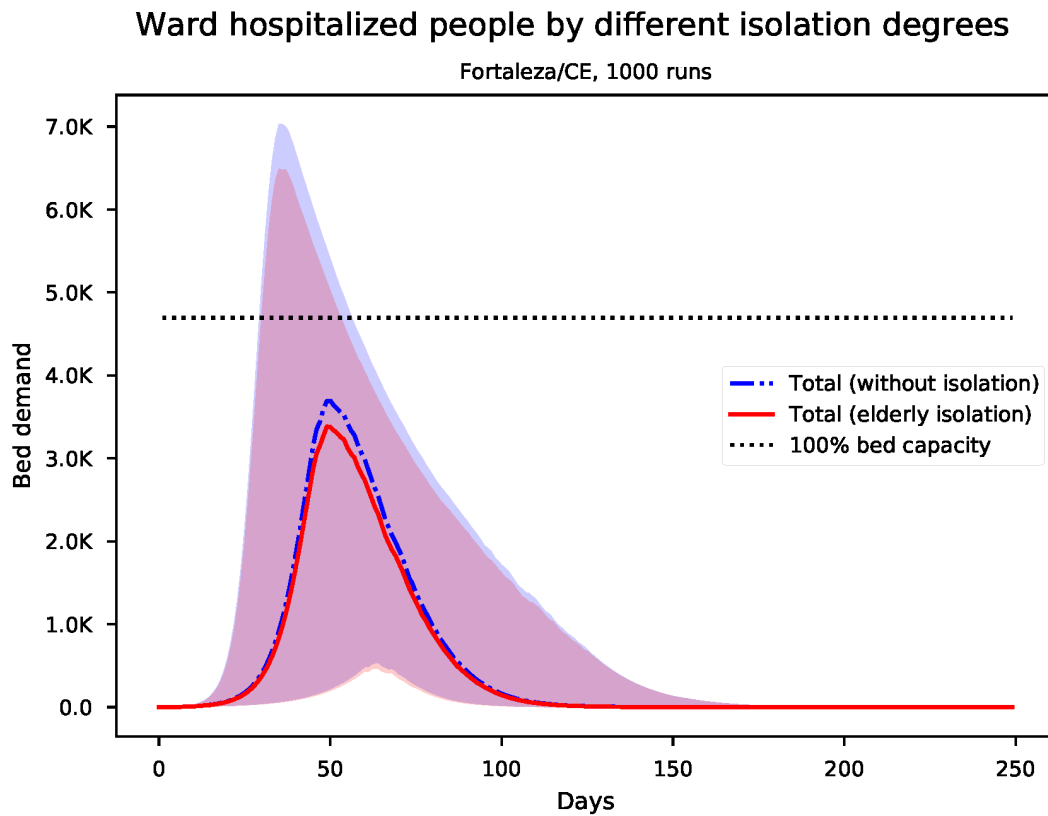

Figure S58: Predicted number of needed ward beds for Fortaleza

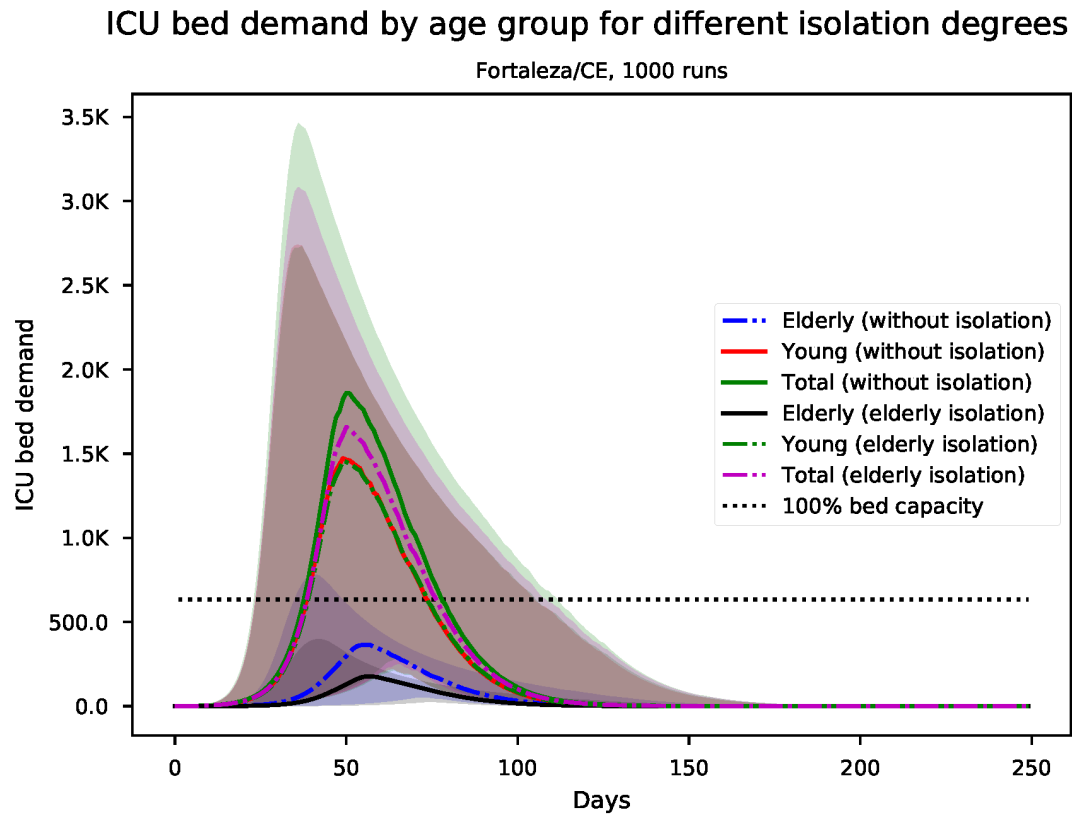

Figure S59: Predicted number of needed ICU beds, by age group for Fortaleza

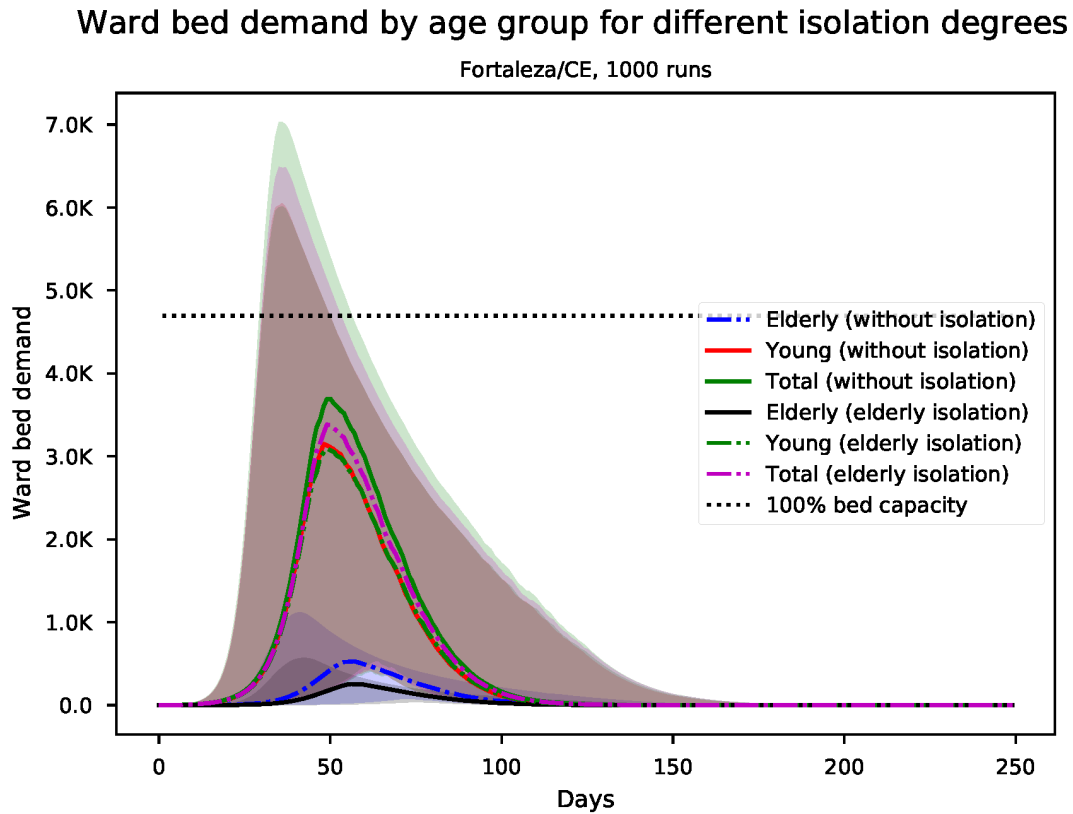

Figure S60: Predicted number of needed ward beds, by age group for Fortaleza

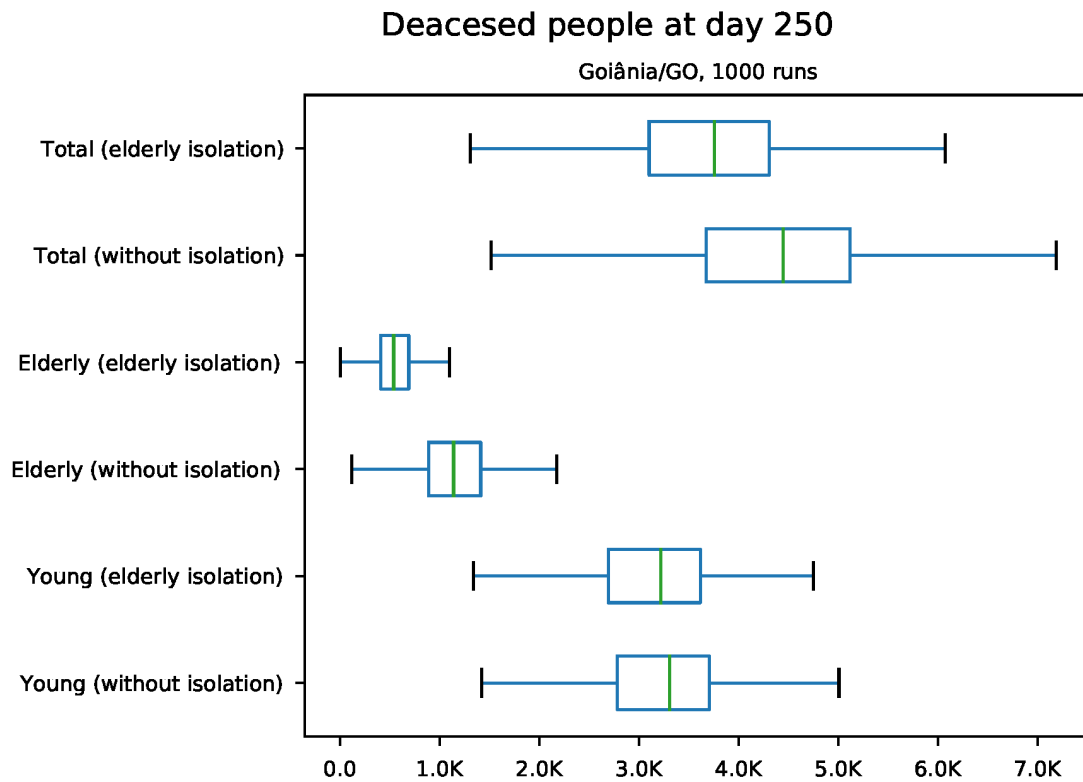

Figure S61: Predicted number of death at day 250 for Goiânia

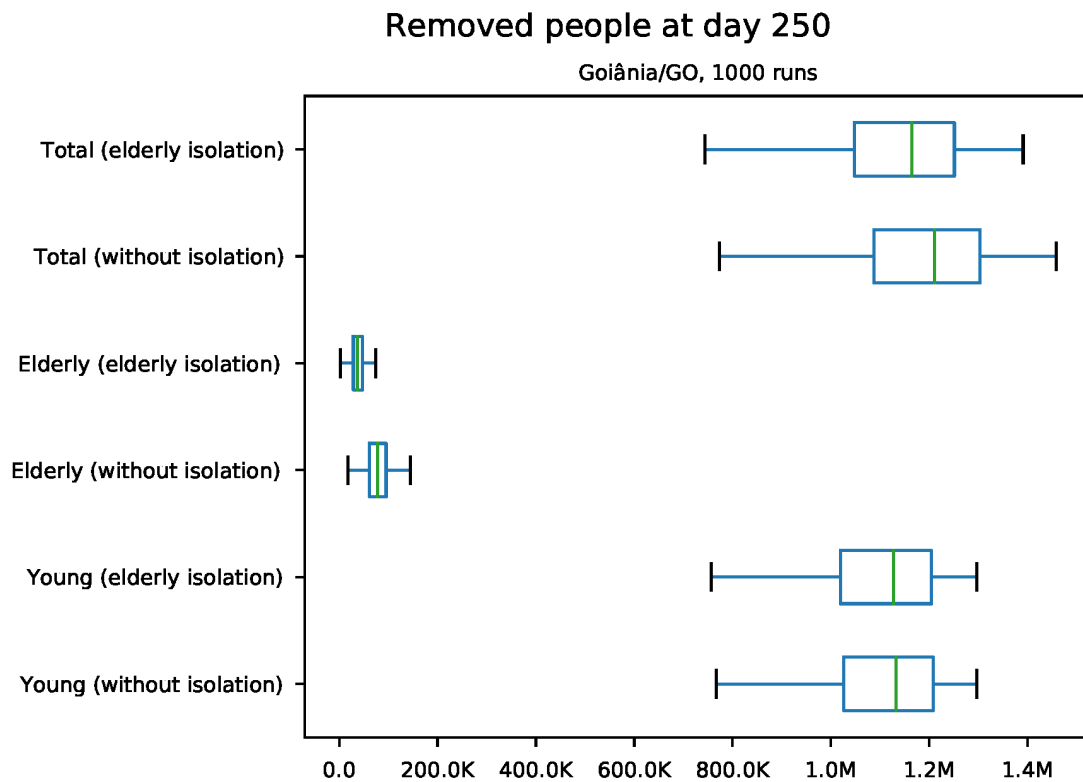

Figure S62: Predicted number of removed individuals at day 250 for Goiânia

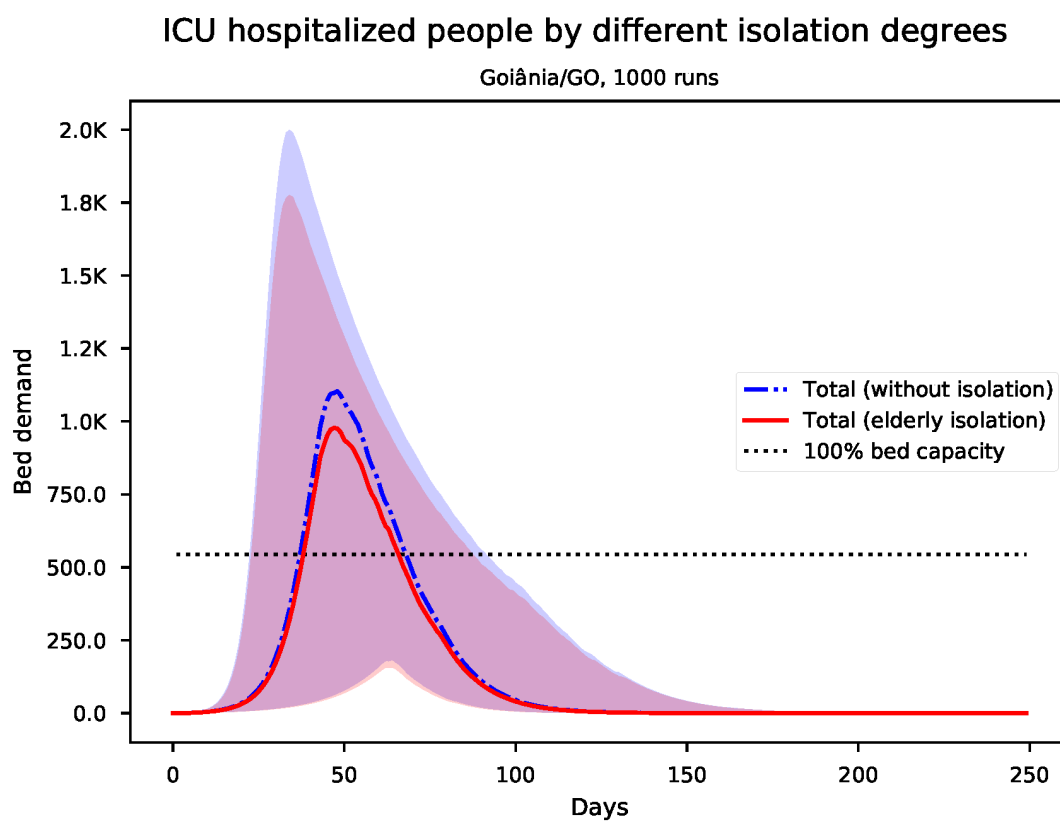

Figure S63: Predicted number of needed ICU beds for Goiânia

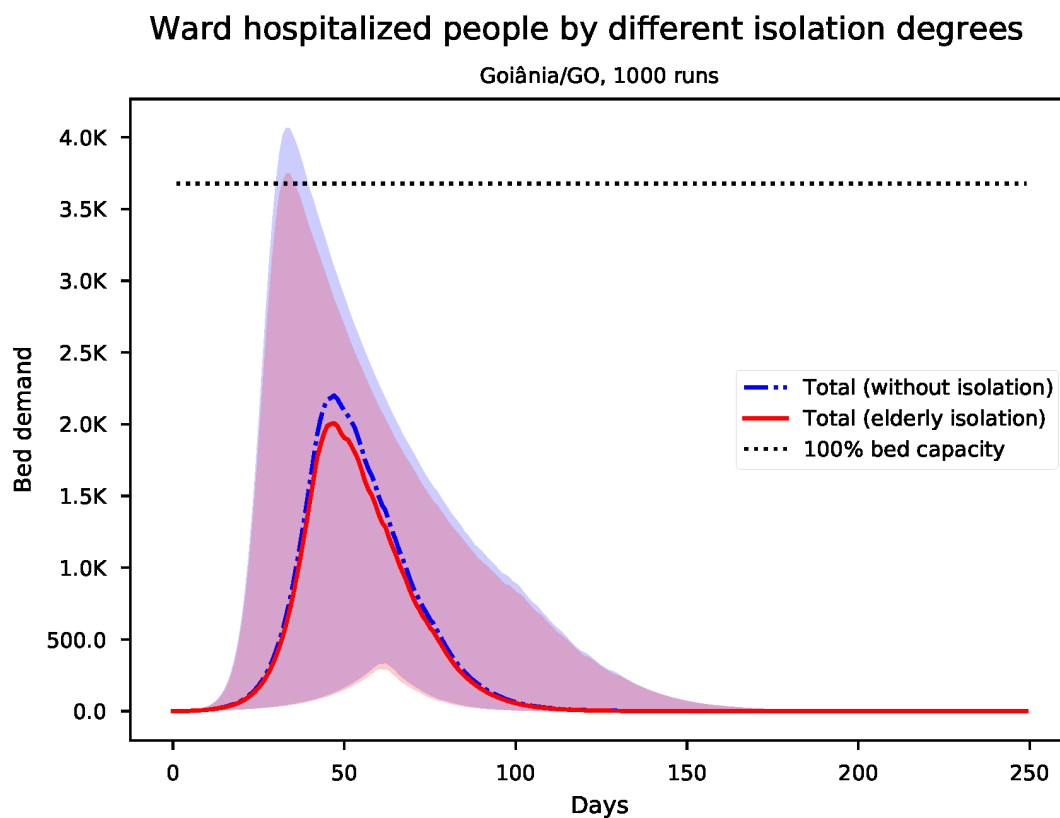

Figure S64: Predicted number of needed ward beds for Goiânia

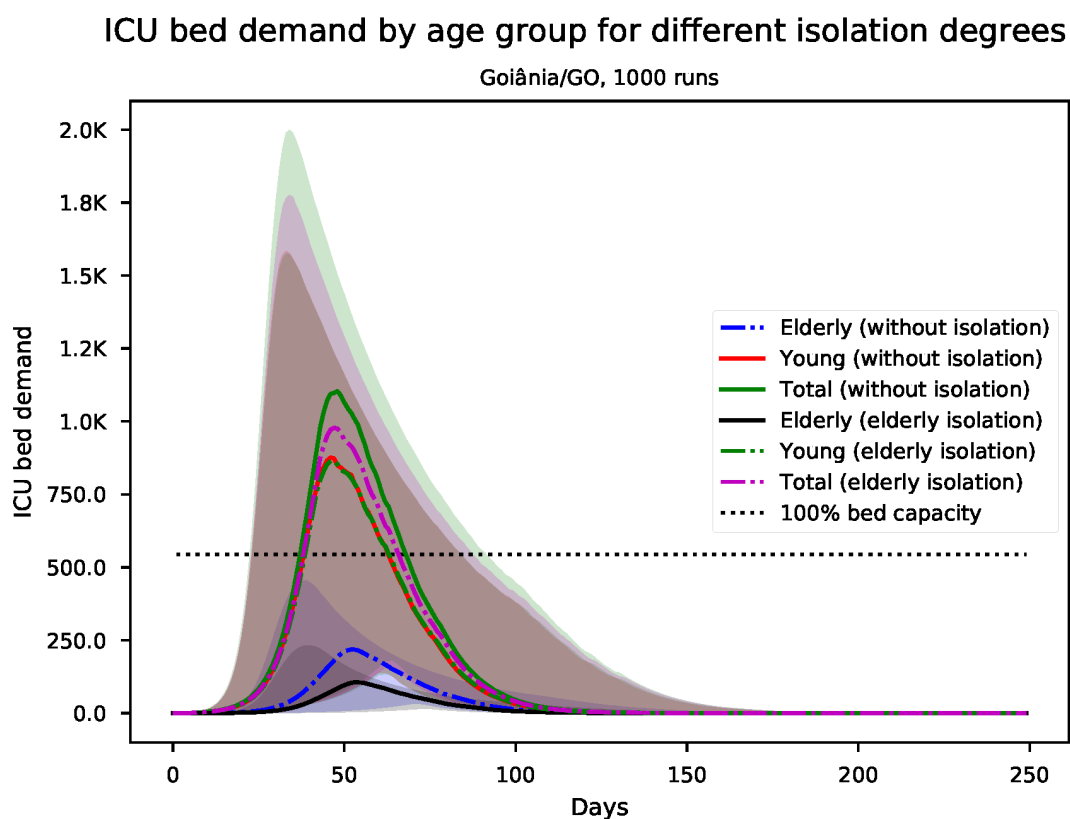

Figure S65: Predicted number of needed ICU beds, by age group for Goiânia

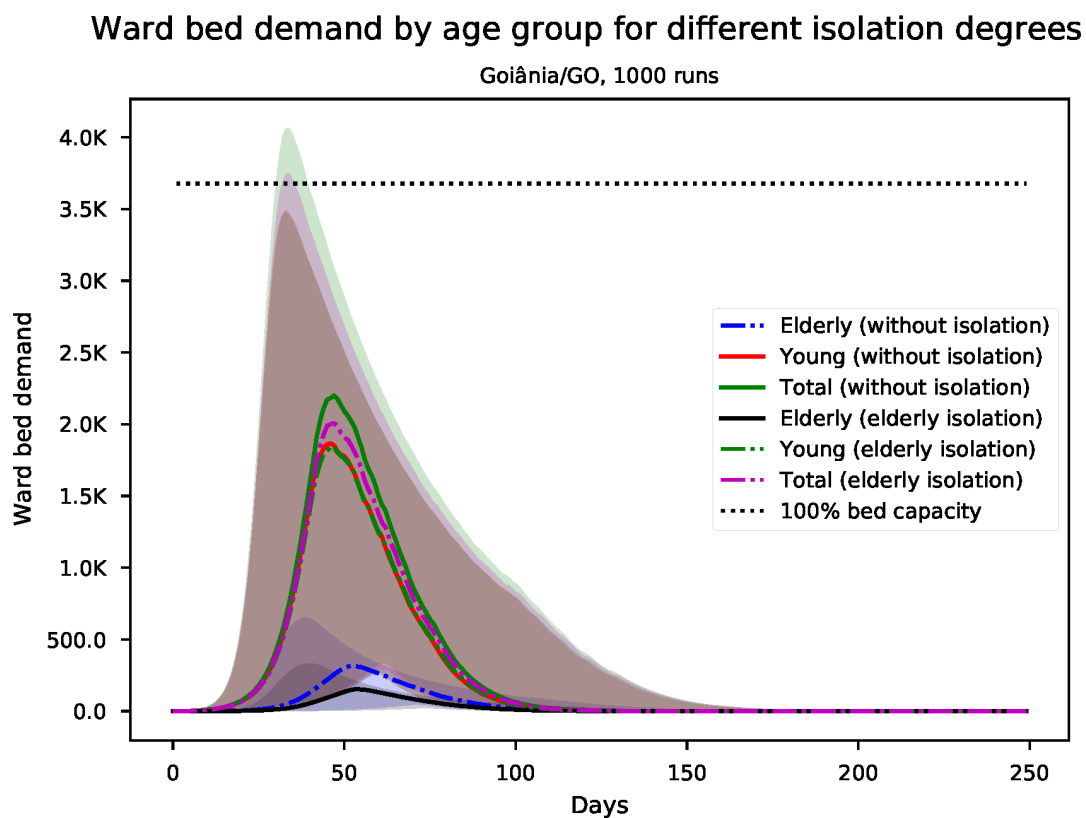

Figure S66: Predicted number of needed ward beds, by age group for Goiânia

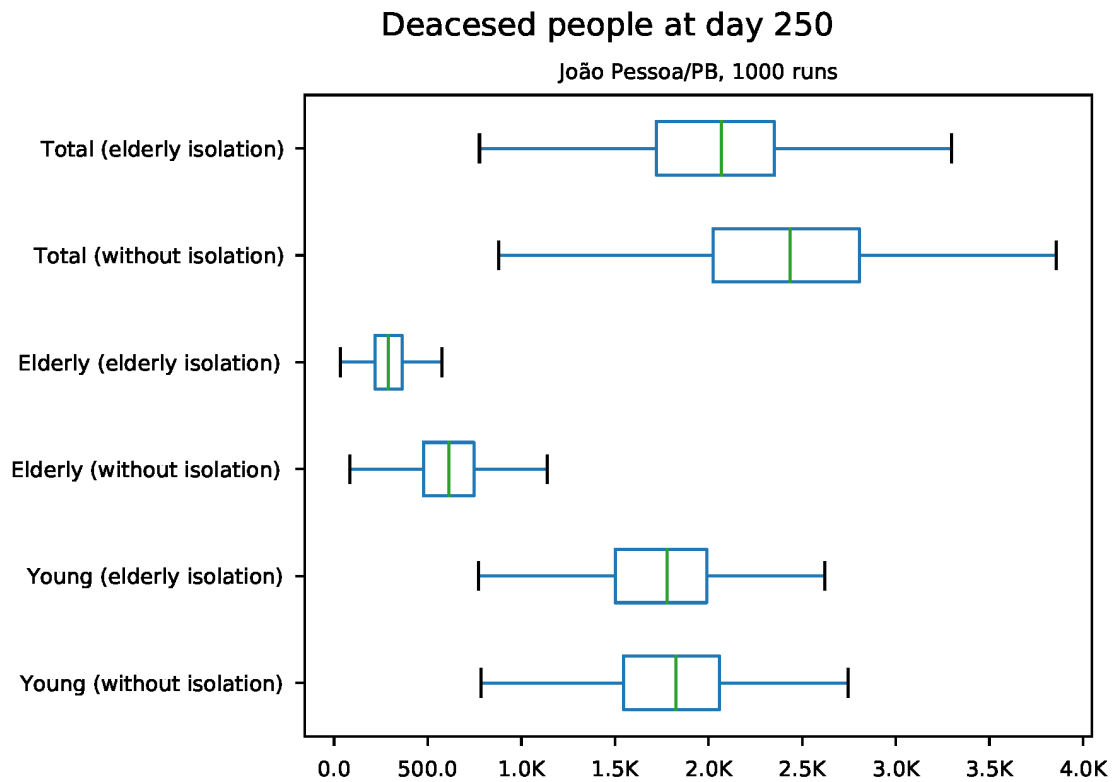

Figure S67: Predicted number of death at day 250 for João Pessoa

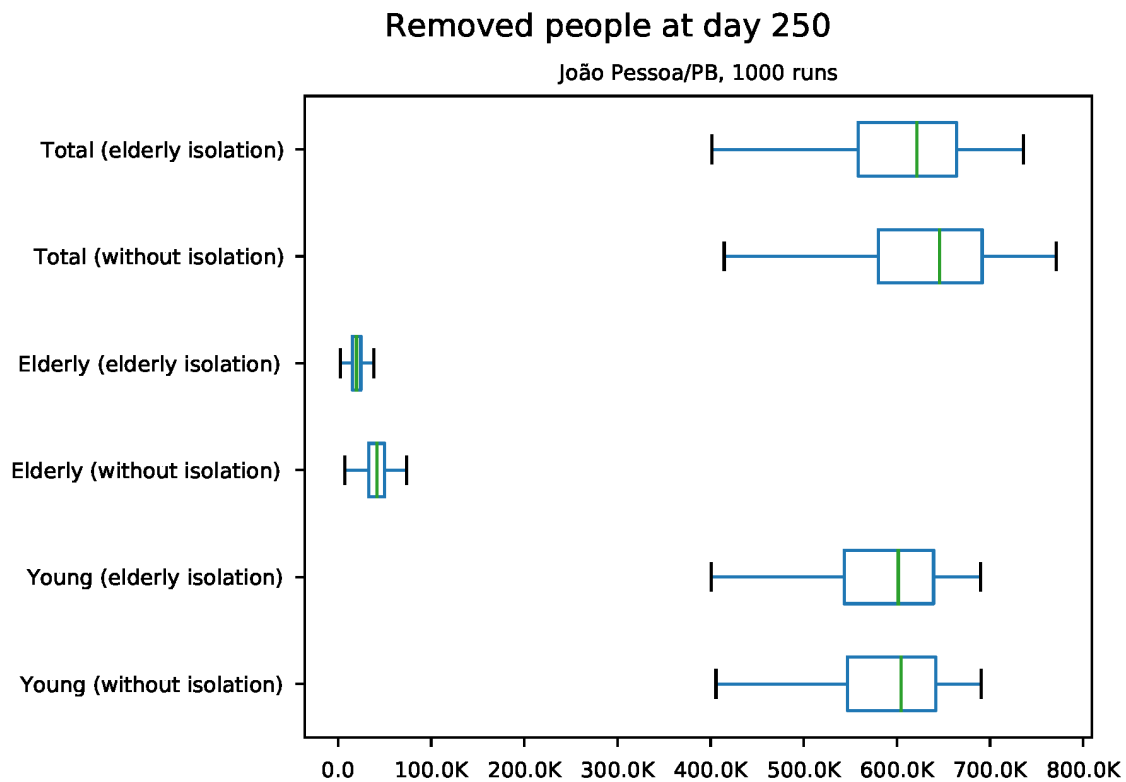

Figure S68: Predicted number of removed individuals at day 250 for João Pessoa

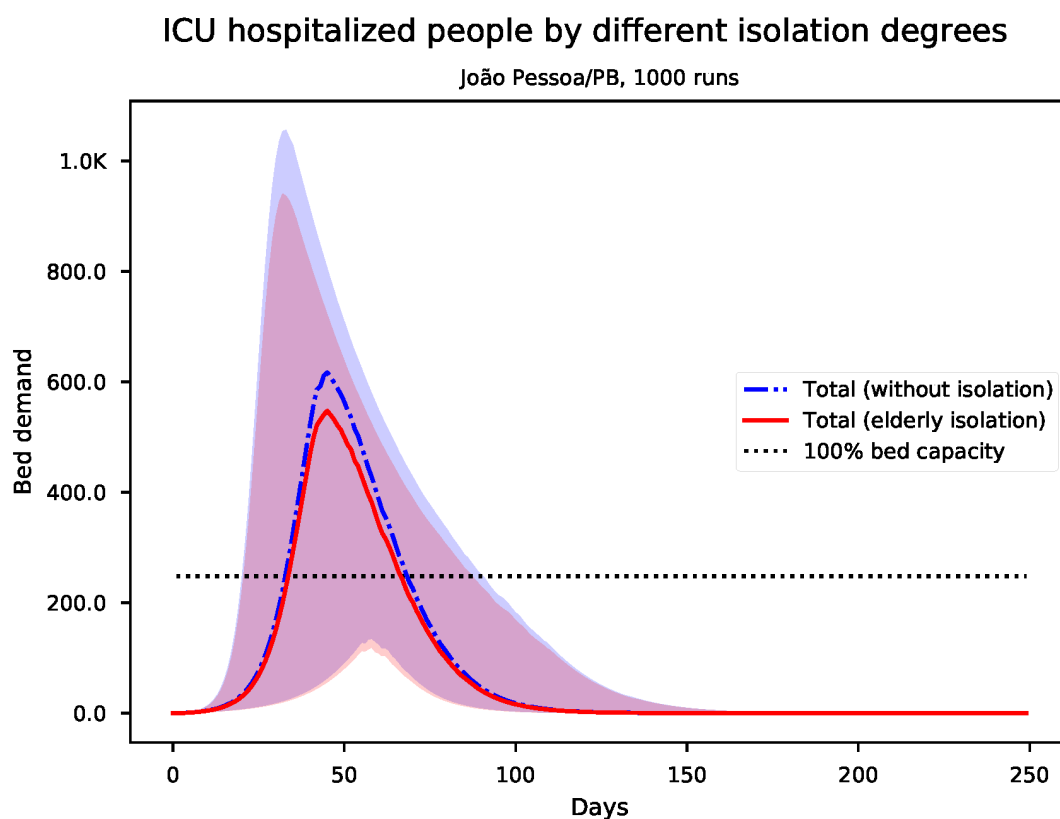

Figure S69: Predicted number of needed ICU beds for João Pessoa

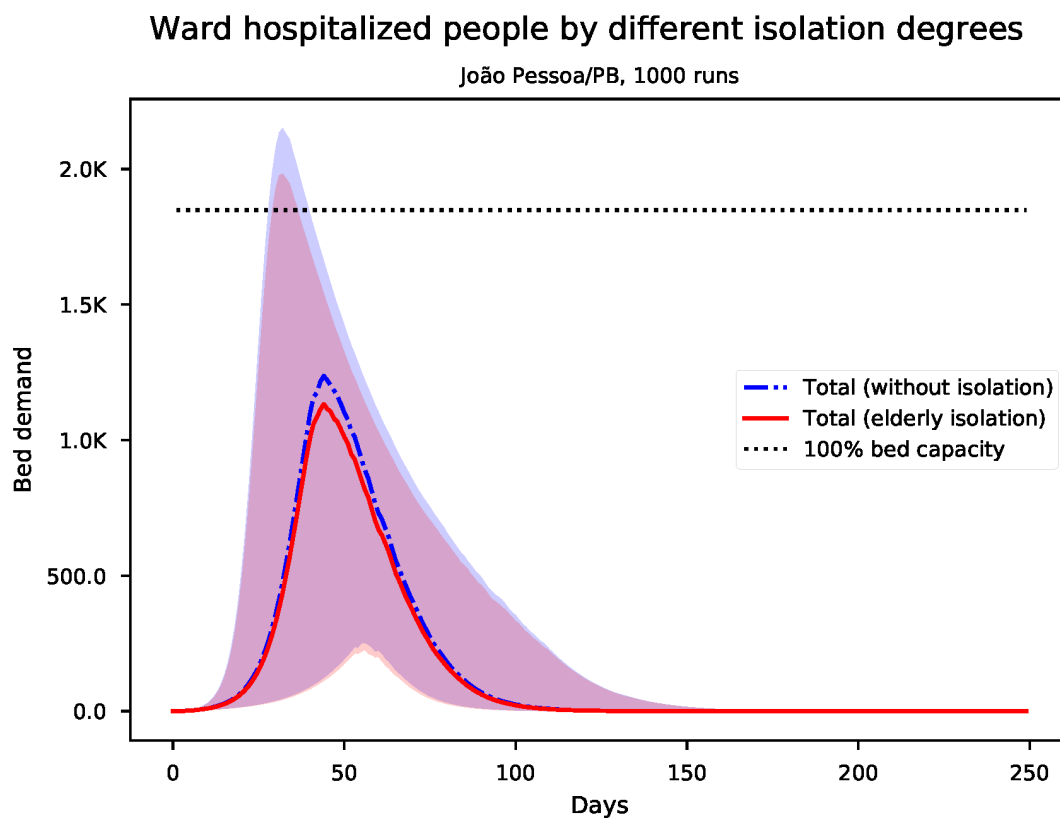

Figure S70: Predicted number of needed ward beds for João Pessoa

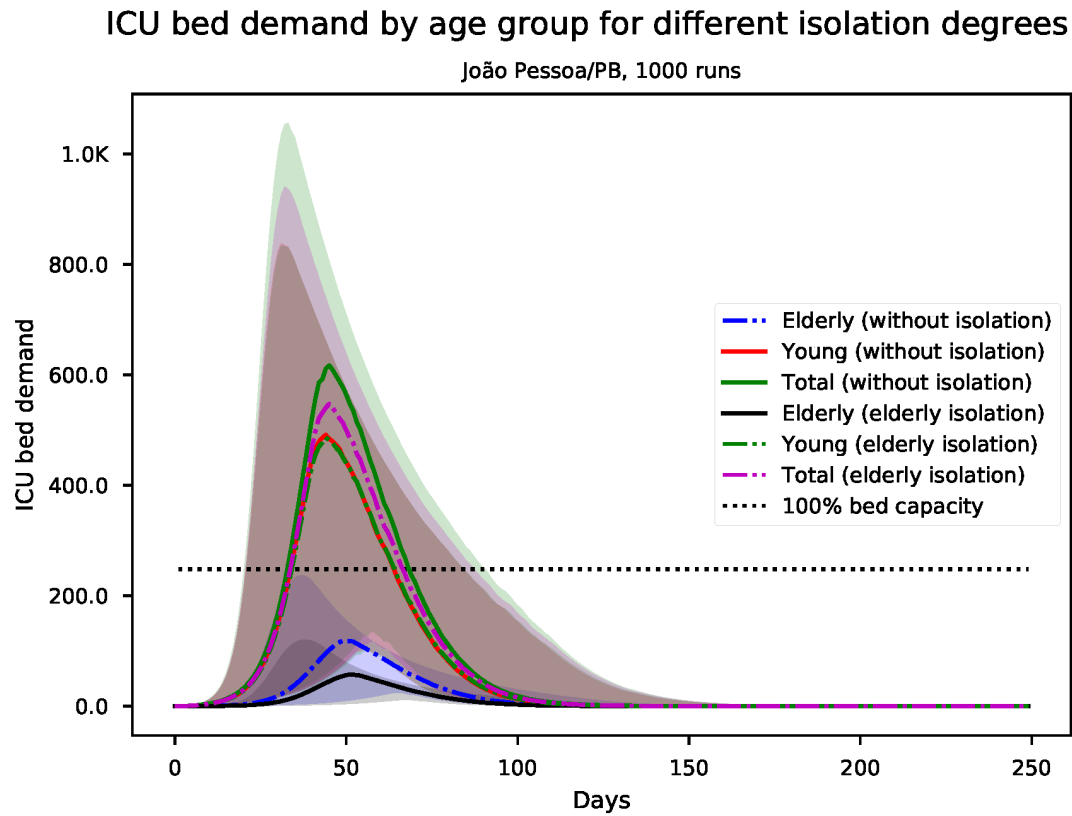

Figure S71: Predicted number of needed ICU beds, by age group for João Pessoa

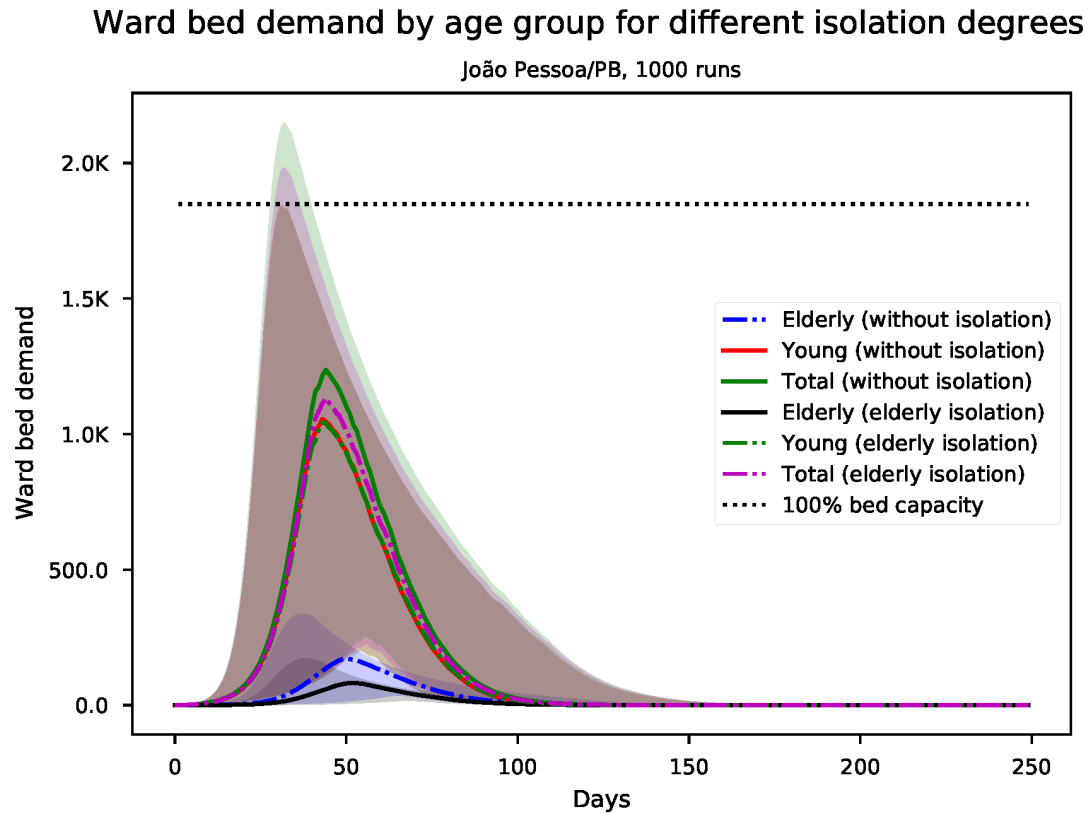

Figure S72: Predicted number of needed ward beds, by age group for João Pessoa

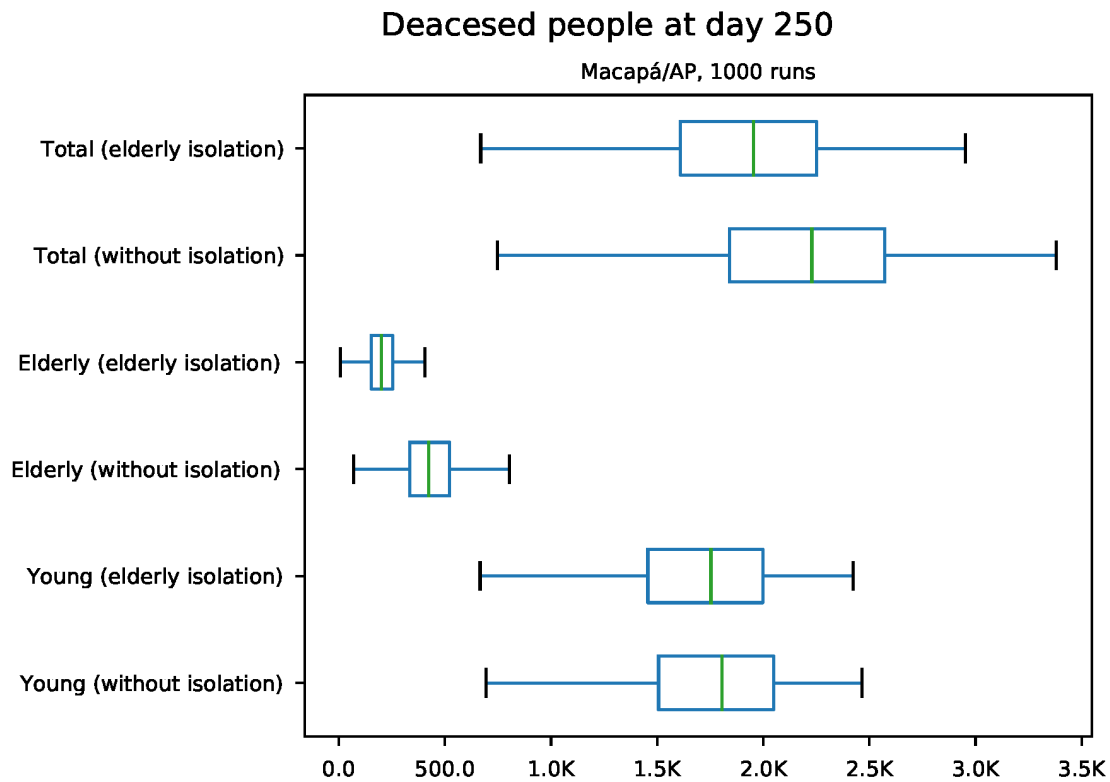

Figure S73: Predicted number of death at day 250 for Macapá

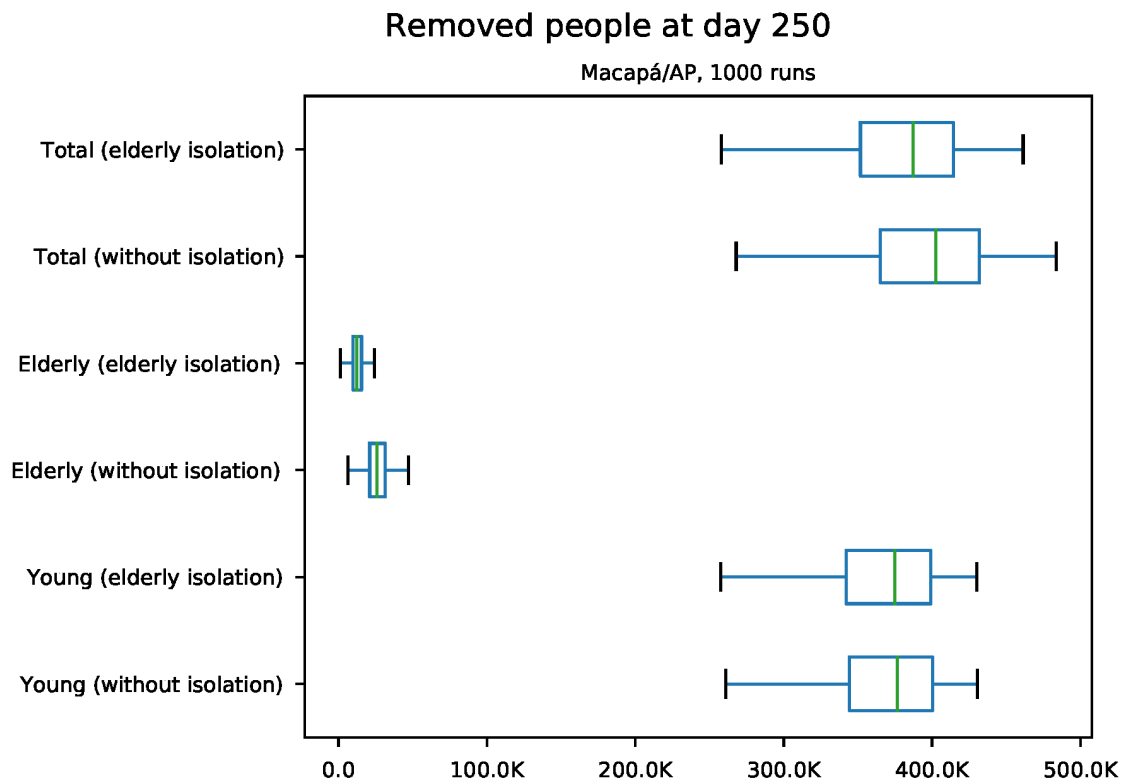

Figure S74: Predicted number of removed individuals at day 250 for Macapá

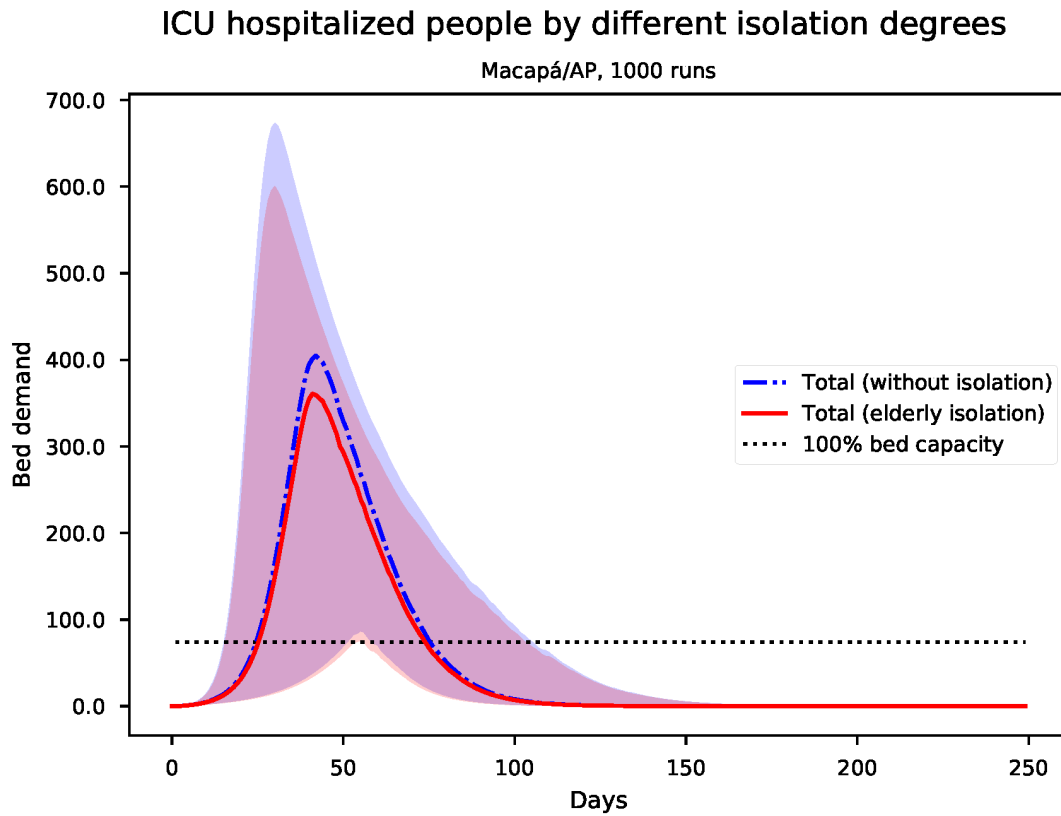

Figure S75: Predicted number of needed ICU beds for Macapá

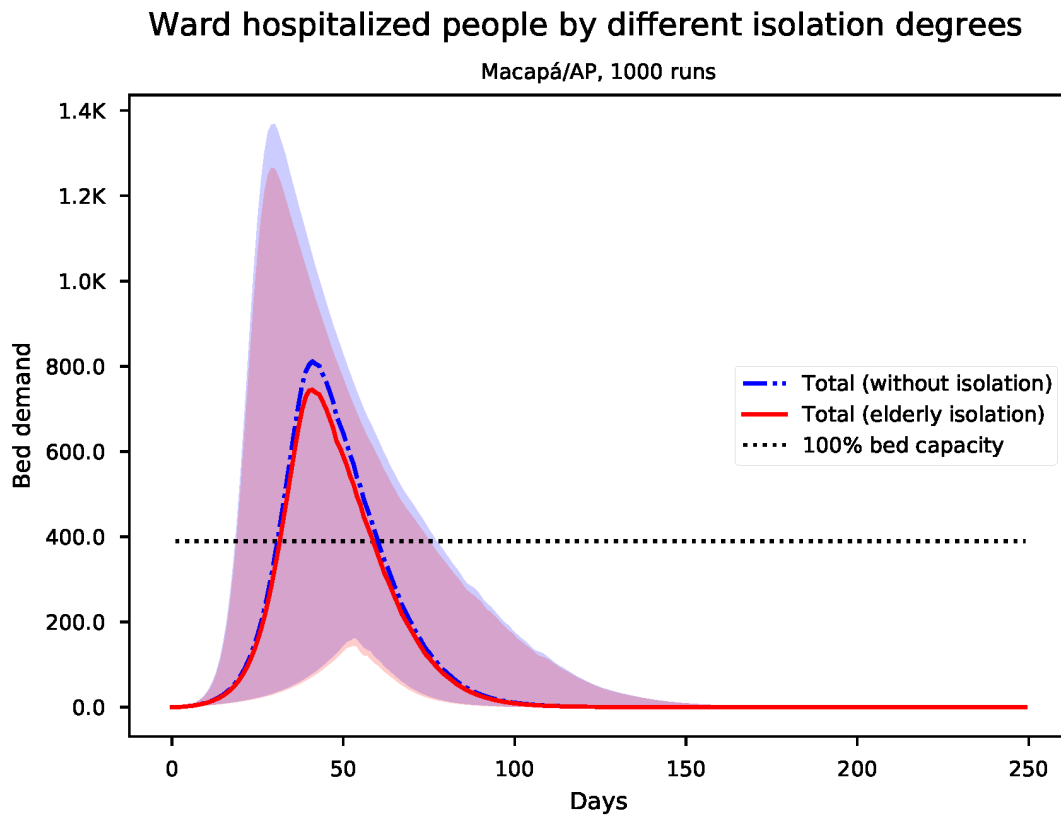

Figure S76: Predicted number of needed ward beds for Macapá

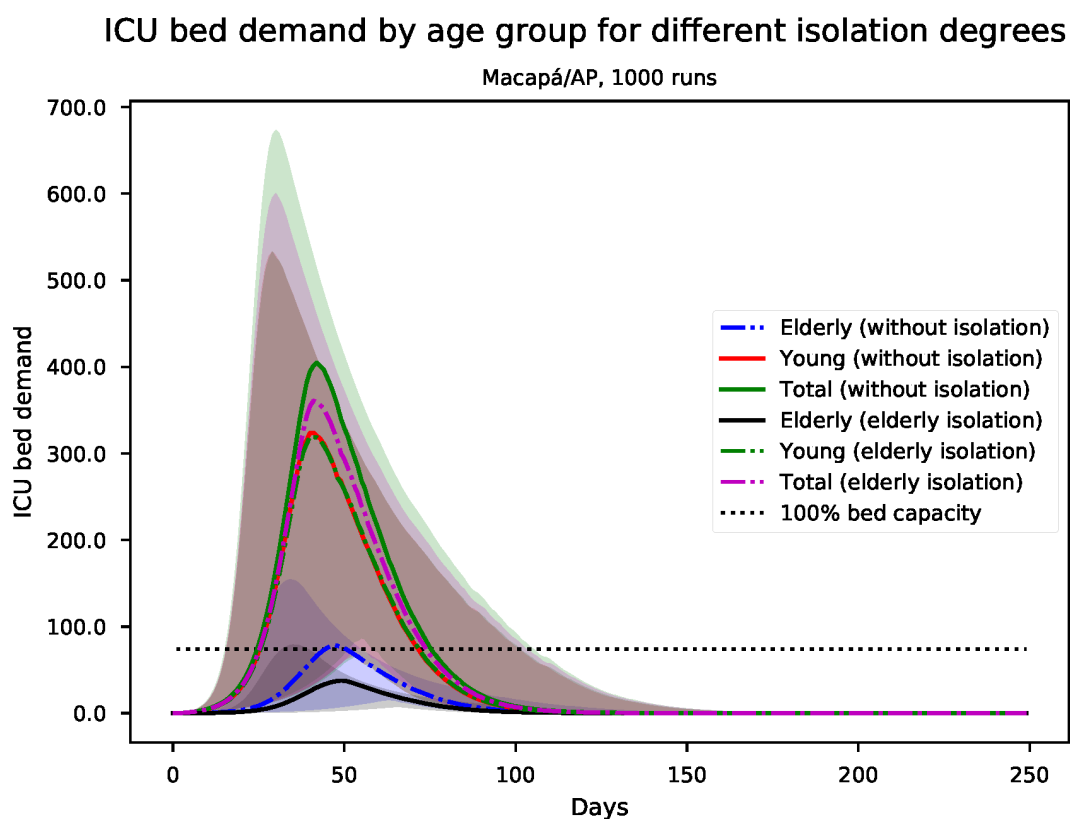

Figure S77: Predicted number of needed ICU beds, by age group for Macapá

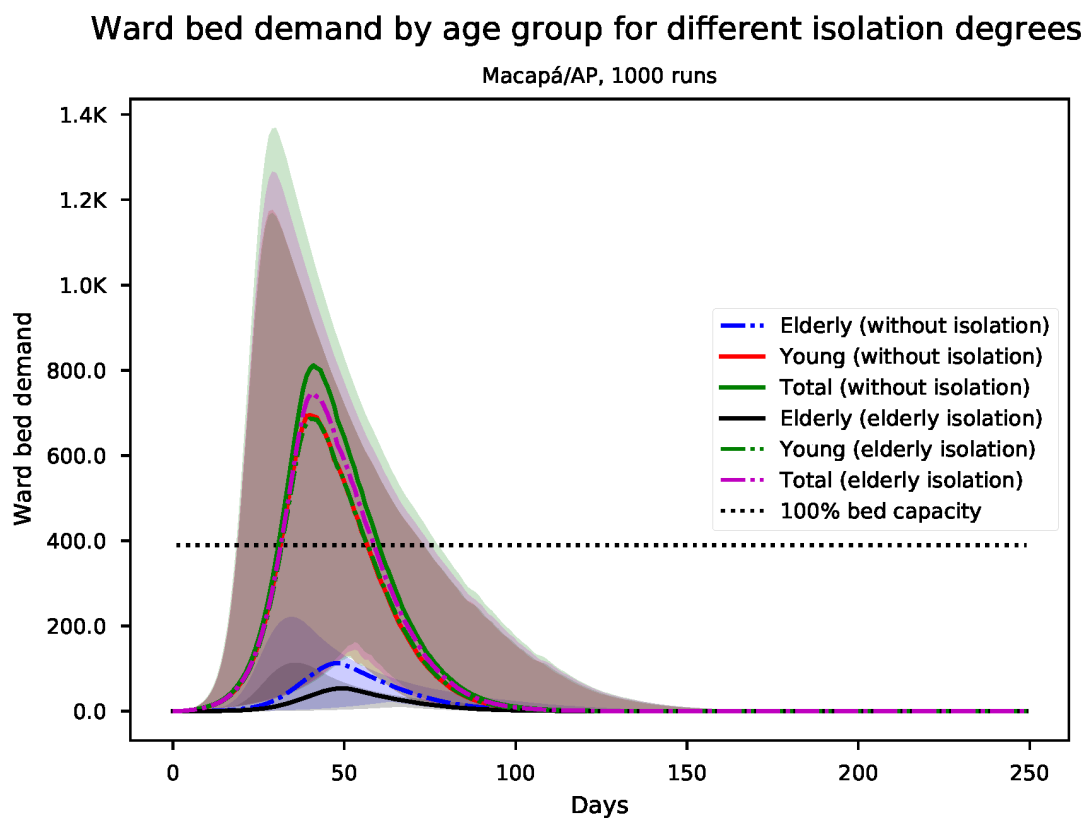

Figure S78: Predicted number of needed ward beds, by age group for Macapá

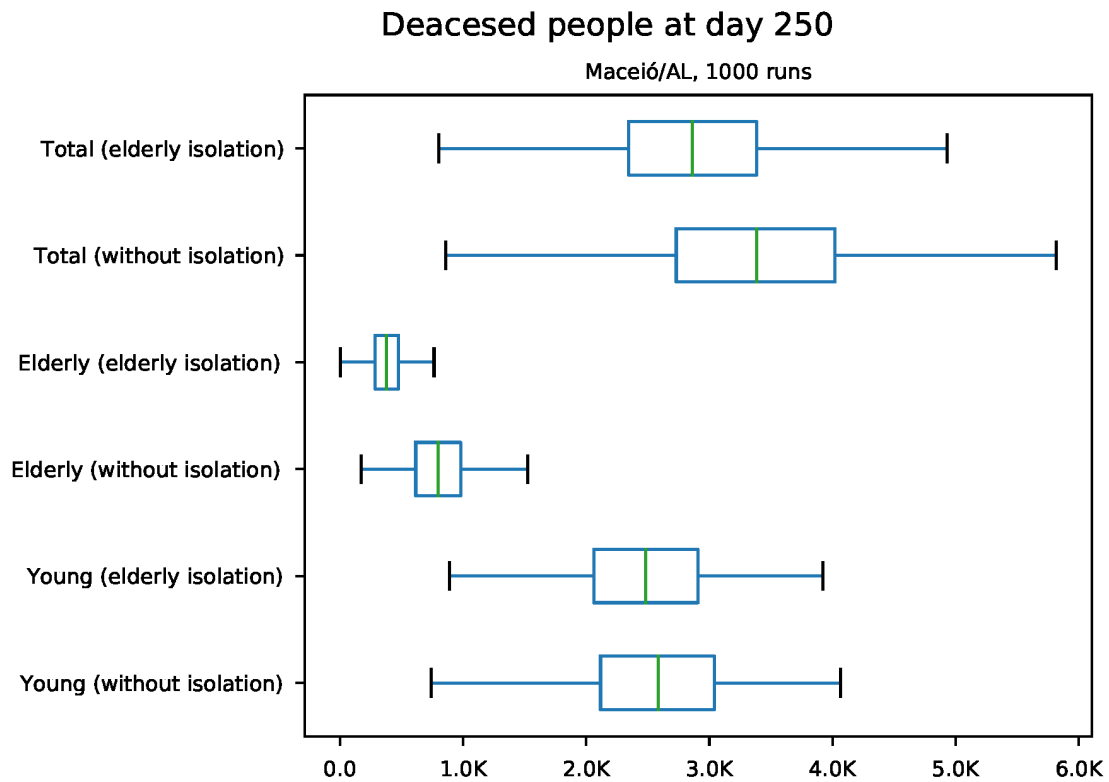

Figure S79: Predicted number of death at day 250 for Maceió

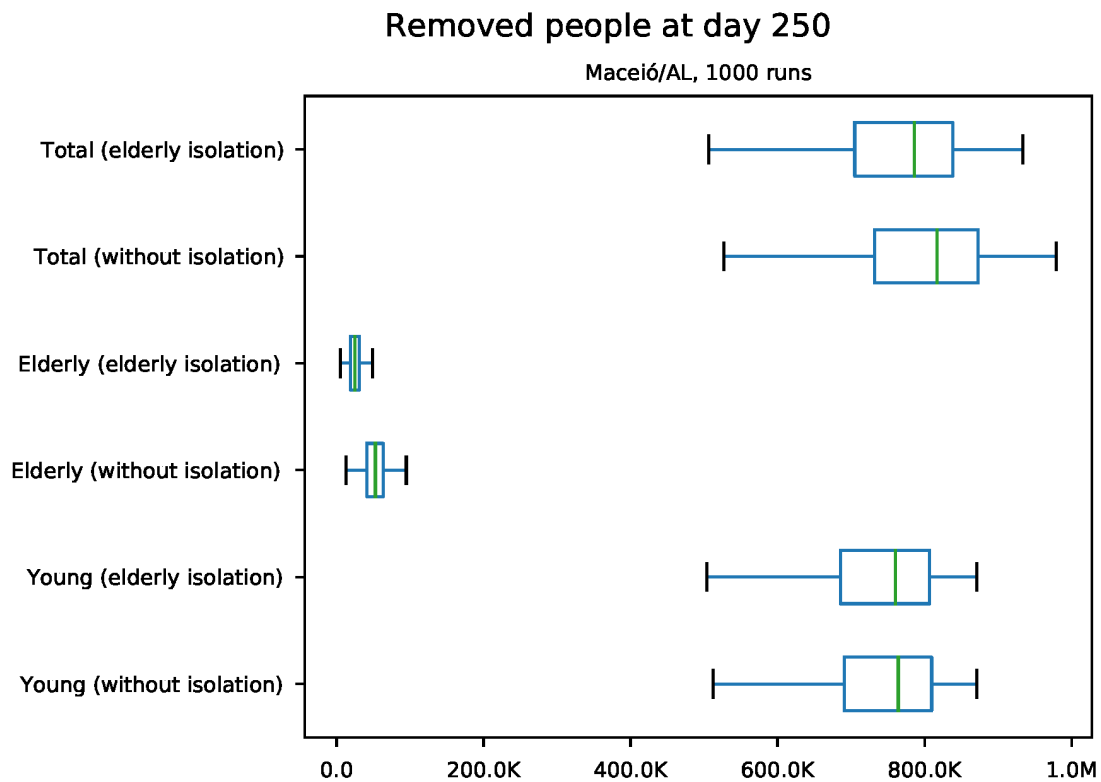

Figure S80: Predicted number of removed individuals at day 250 for Maceió

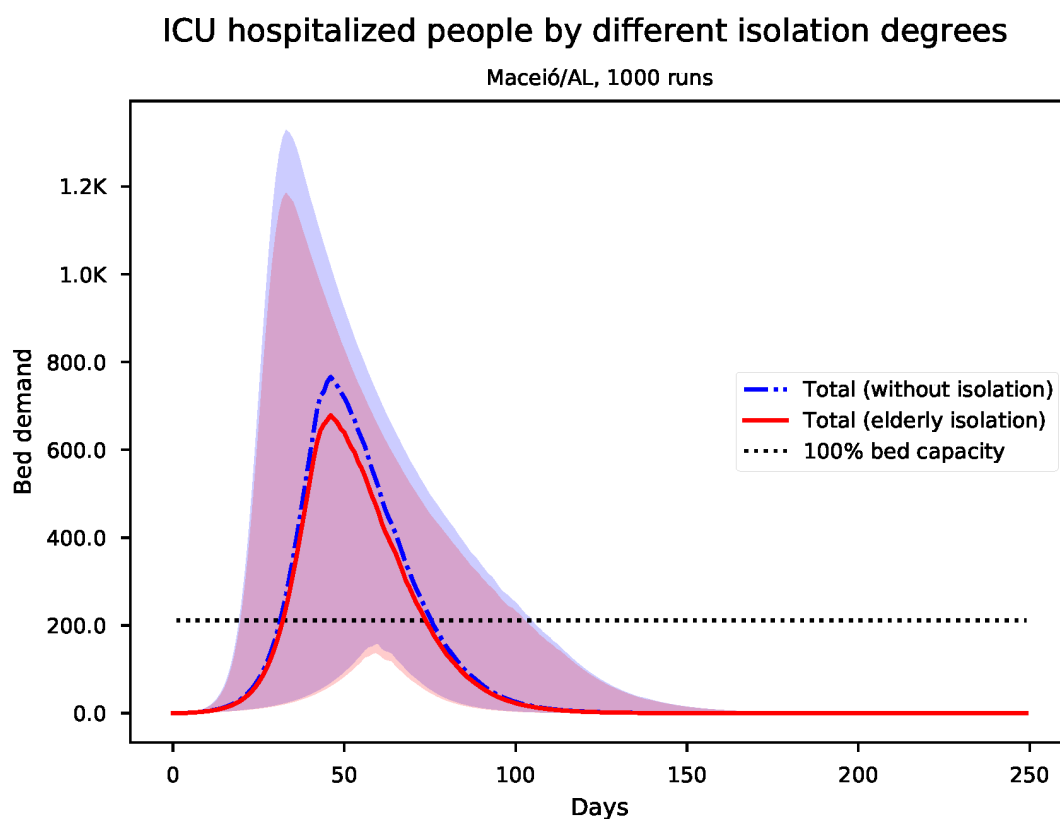

Figure S81: Predicted number of needed ICU beds for Maceió

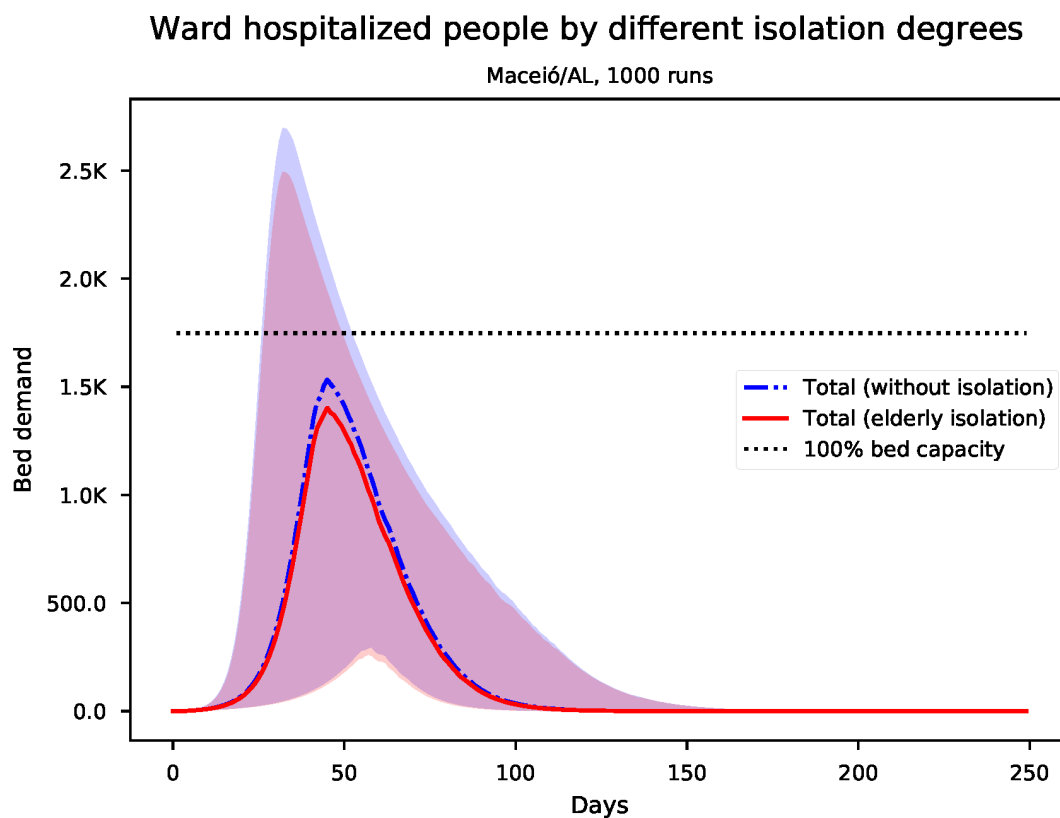

Figure S82: Predicted number of needed ward beds for Maceió

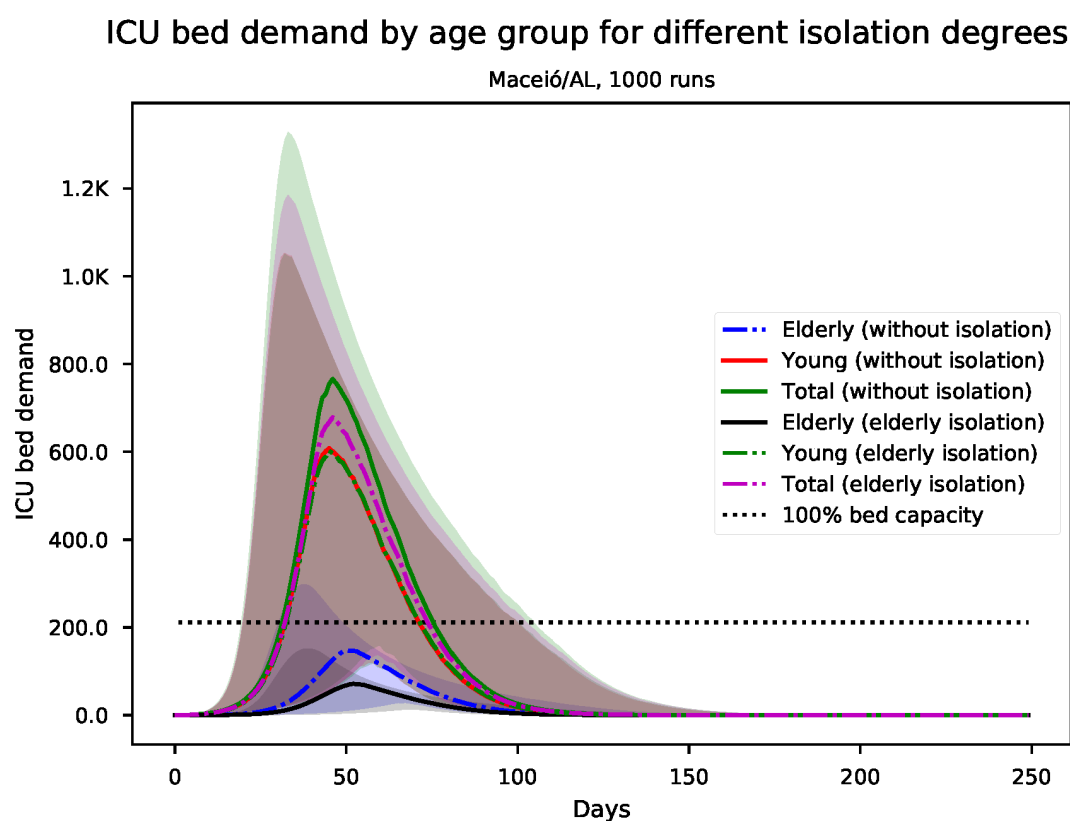

Figure S83: Predicted number of needed ICU beds, by age group for Maceió

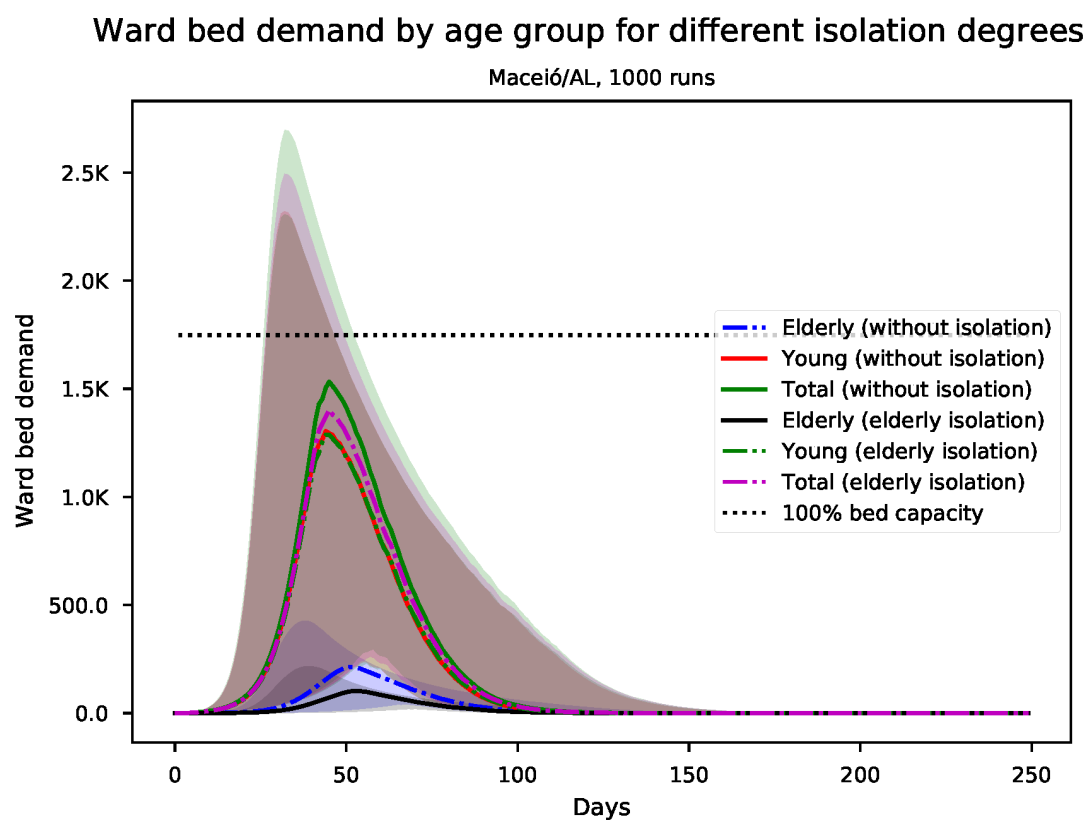

Figure S84: Predicted number of needed ward beds, by age group for Maceió

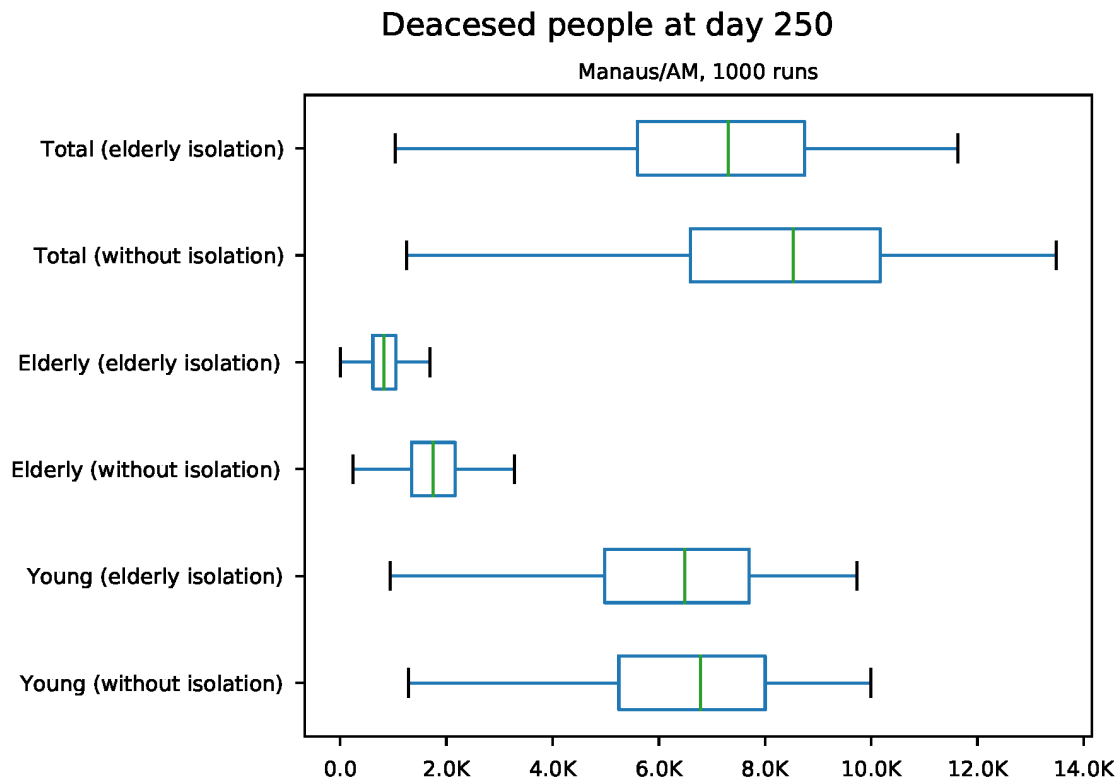

Figure S85: Predicted number of death at day 250 for Manaus

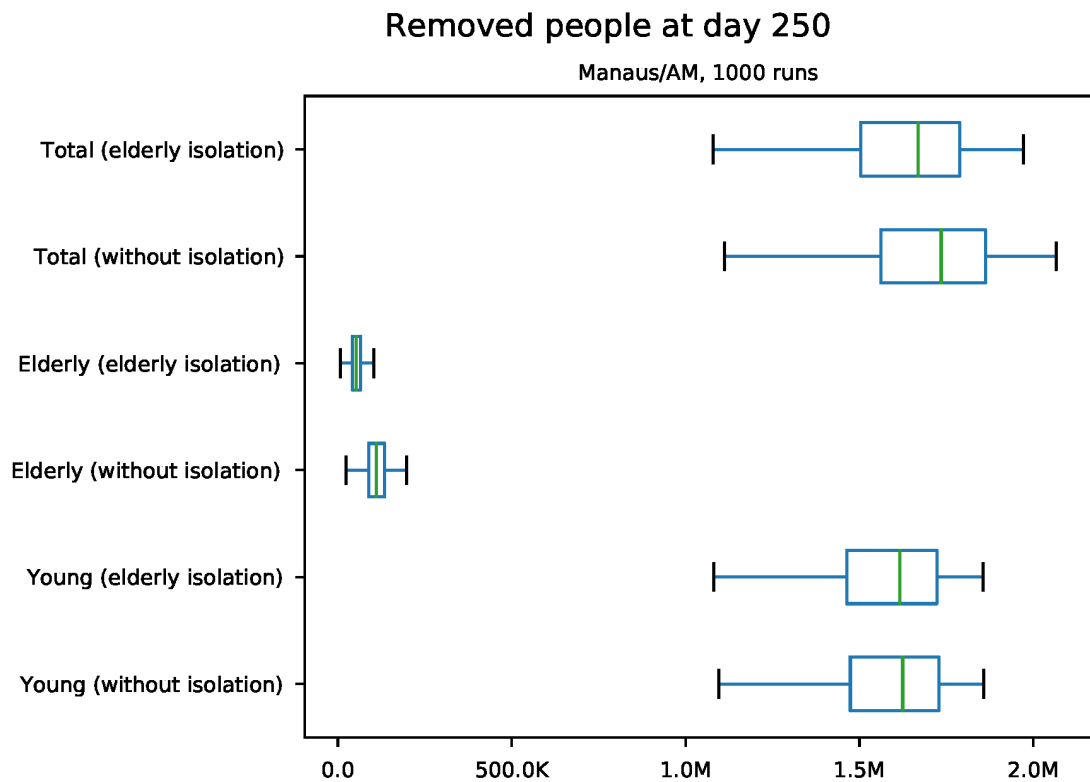

Figure S86: Predicted number of removed individuals at day 250 for Manaus

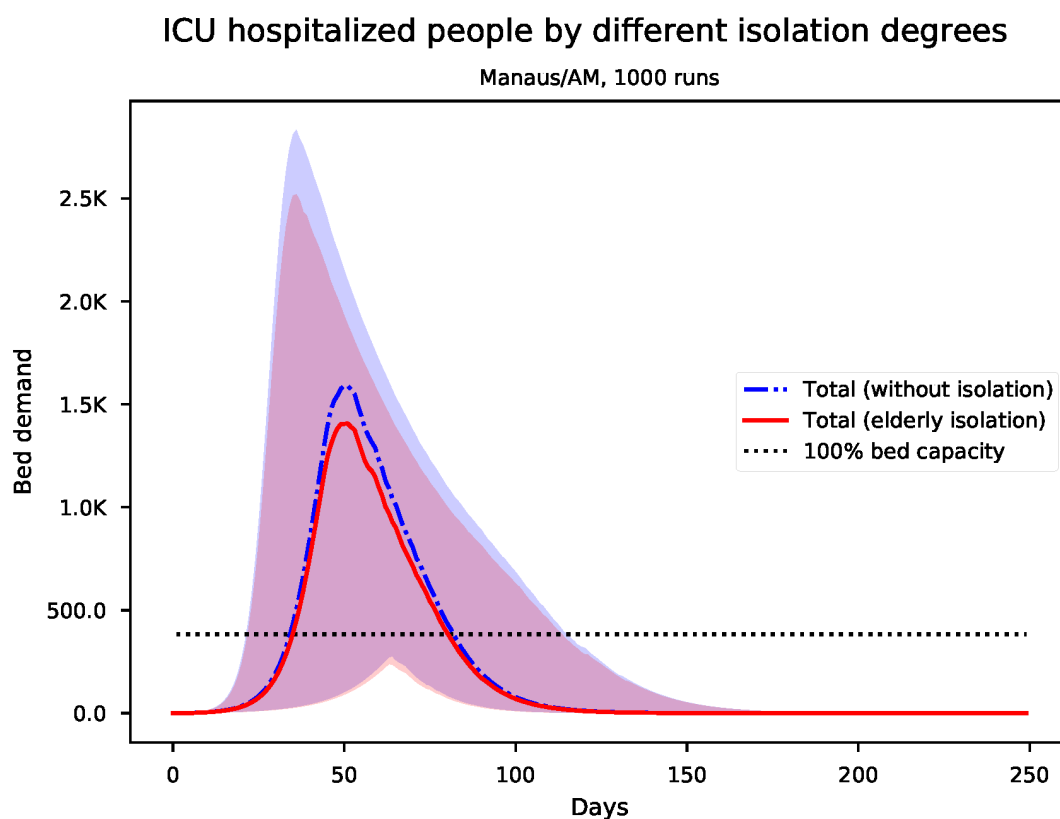

Figure S87: Predicted number of needed ICU beds for Manaus

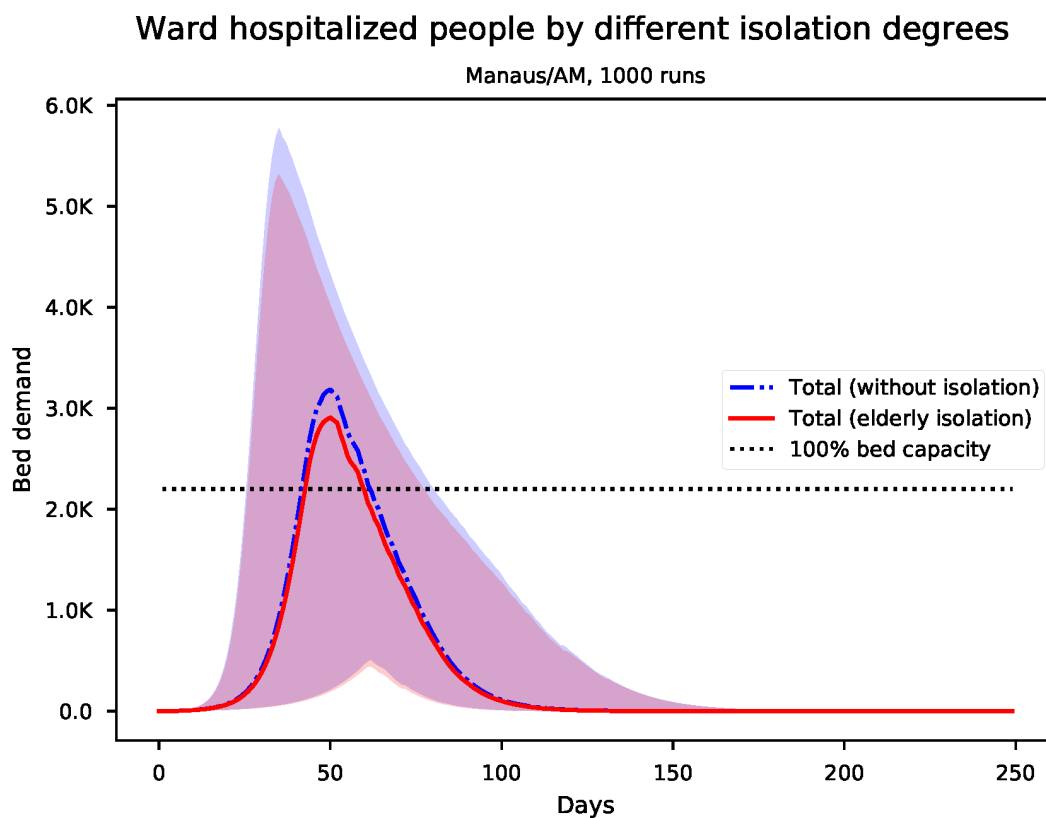

Figure S88: Predicted number of needed ward beds for Manaus

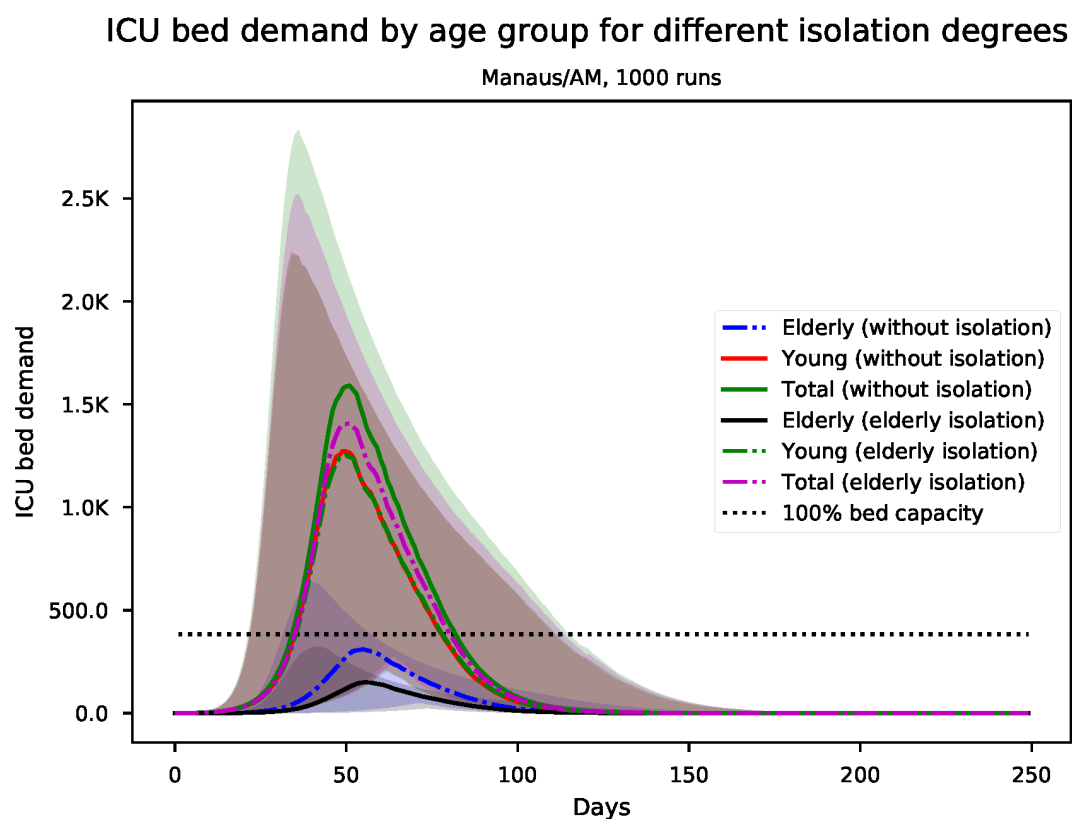

Figure S89: Predicted number of needed ICU beds, by age group for Manaus

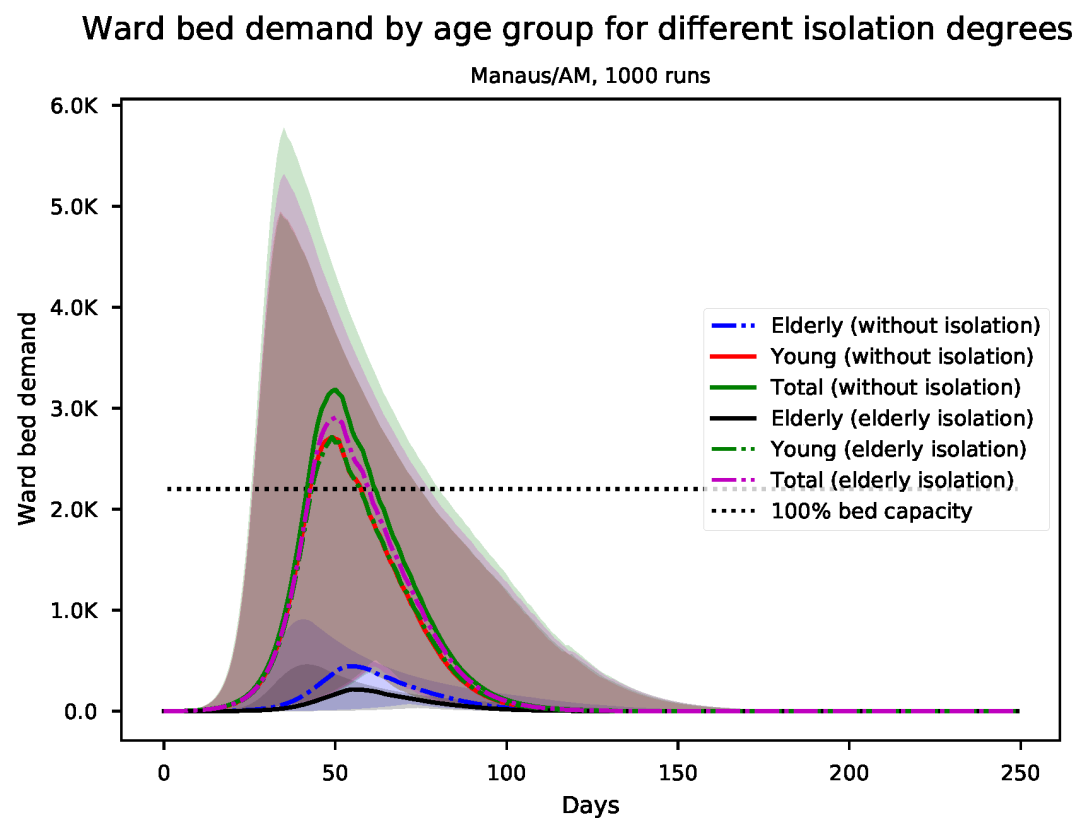

Figure S90: Predicted number of needed ward beds, by age group for Manaus

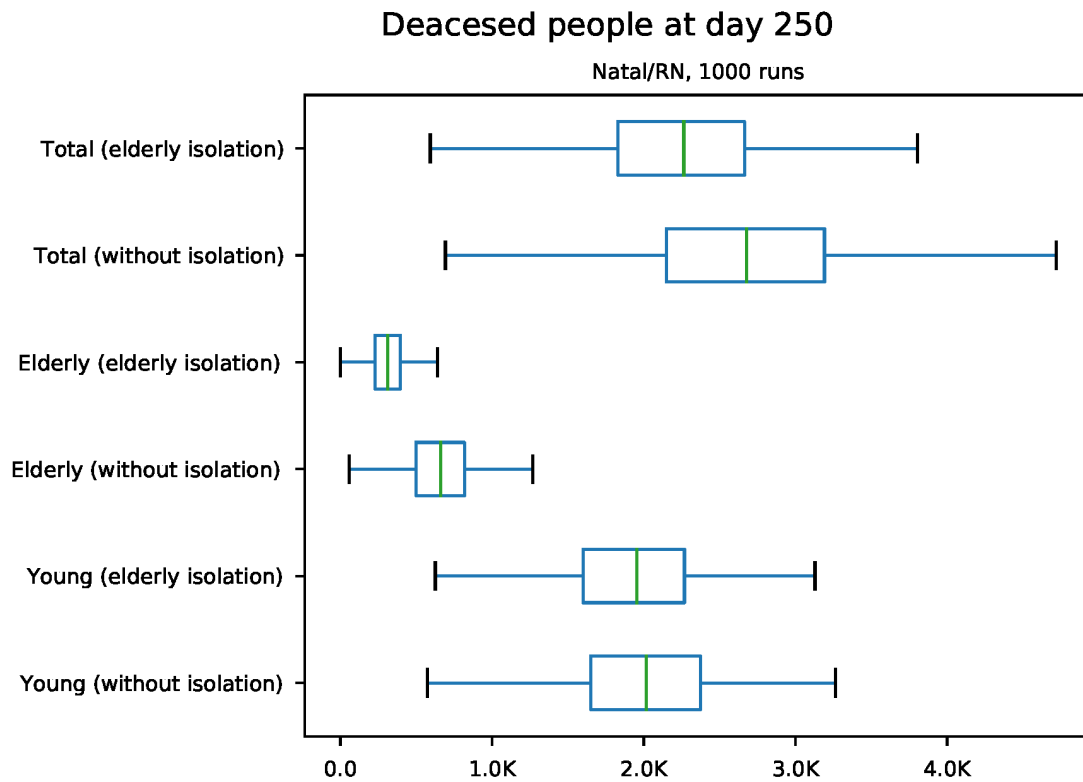

Figure S91: Predicted number of death at day 250 for Natal

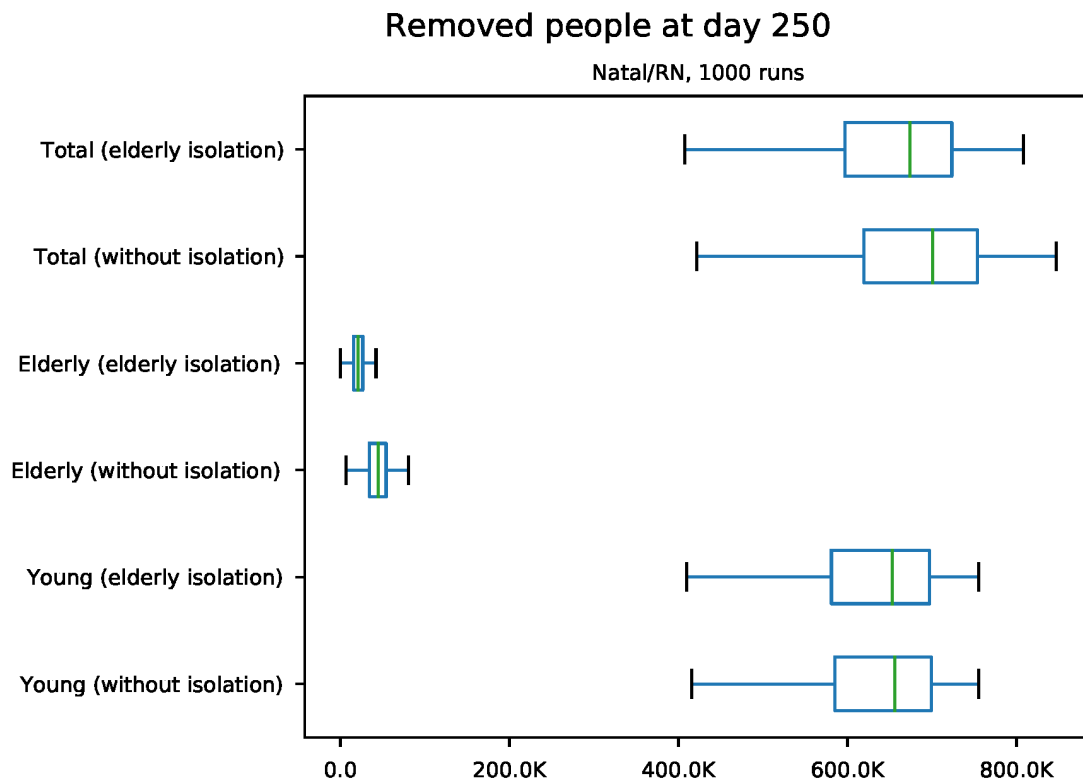

Figure S92: Predicted number of removed individuals at day 250 for Natal

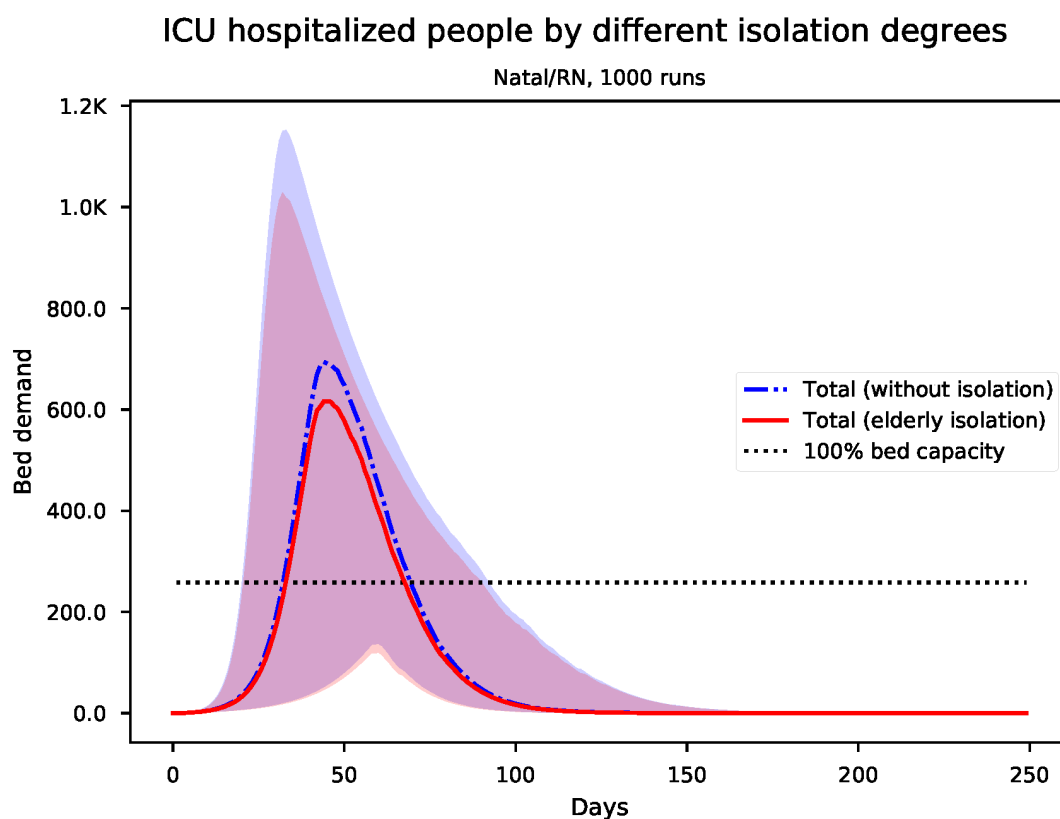

Figure S93: Predicted number of needed ICU beds for Natal

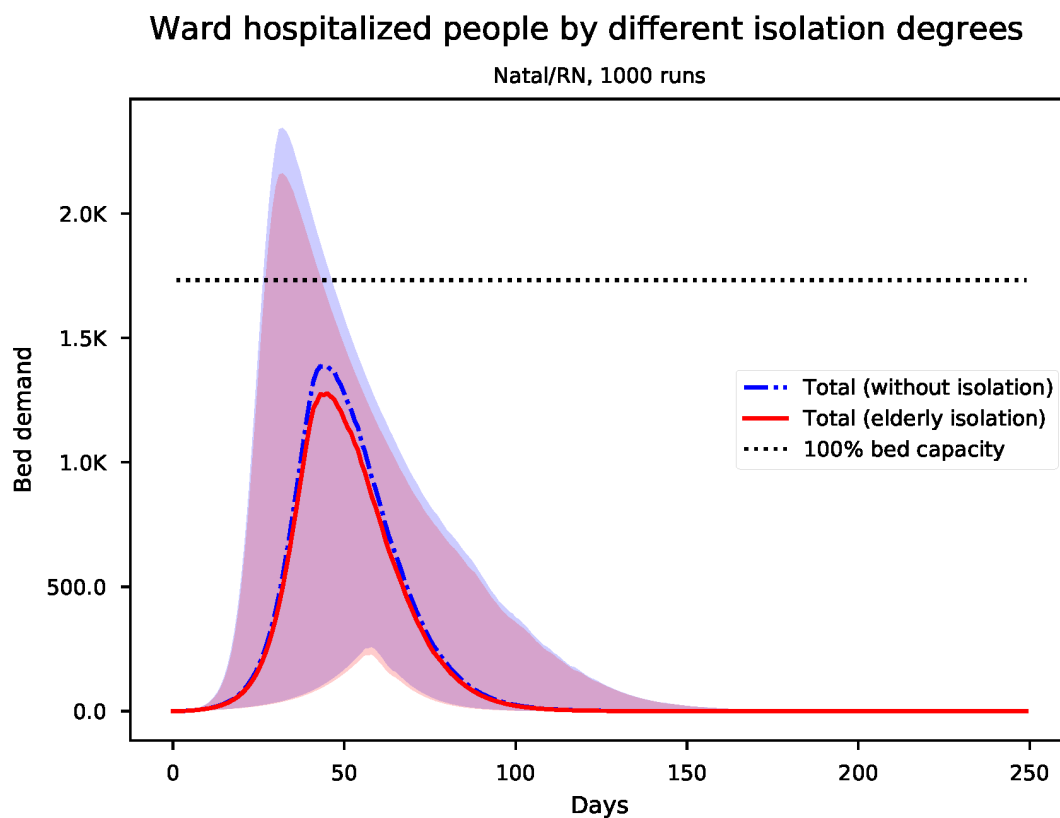

Figure S94: Predicted number of needed ward beds for Natal

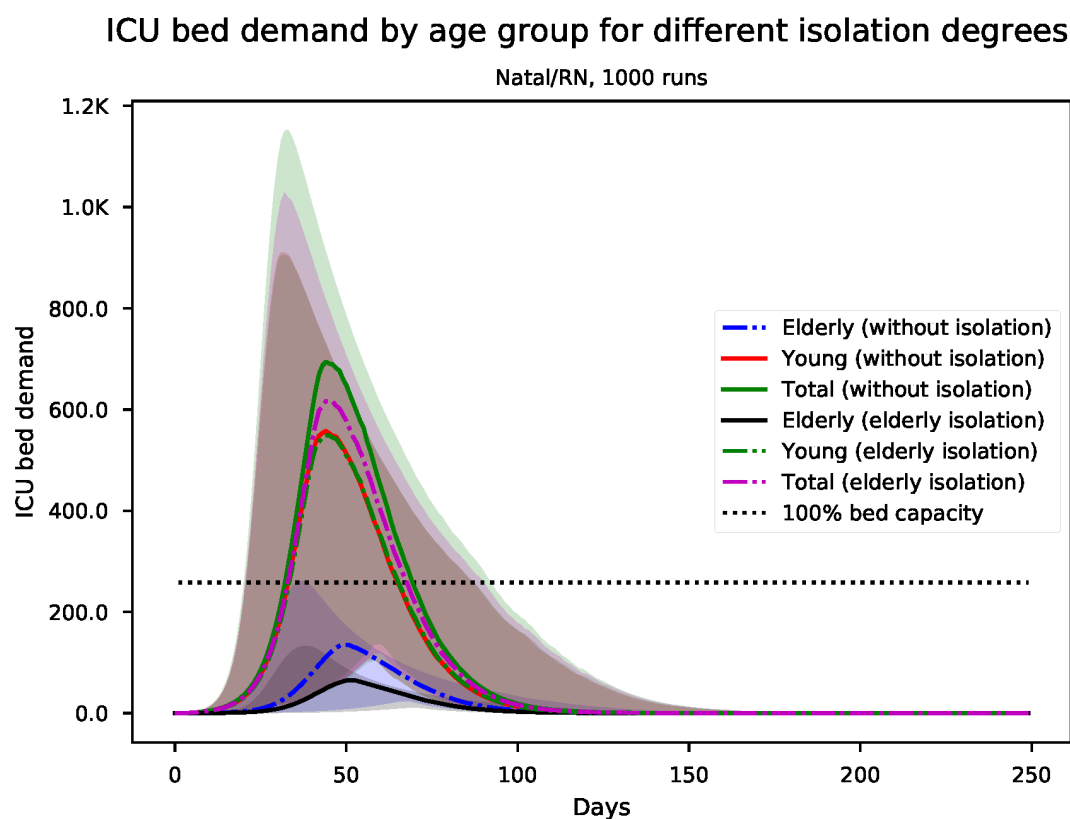

Figure S95: Predicted number of needed ICU beds, by age group for Natal

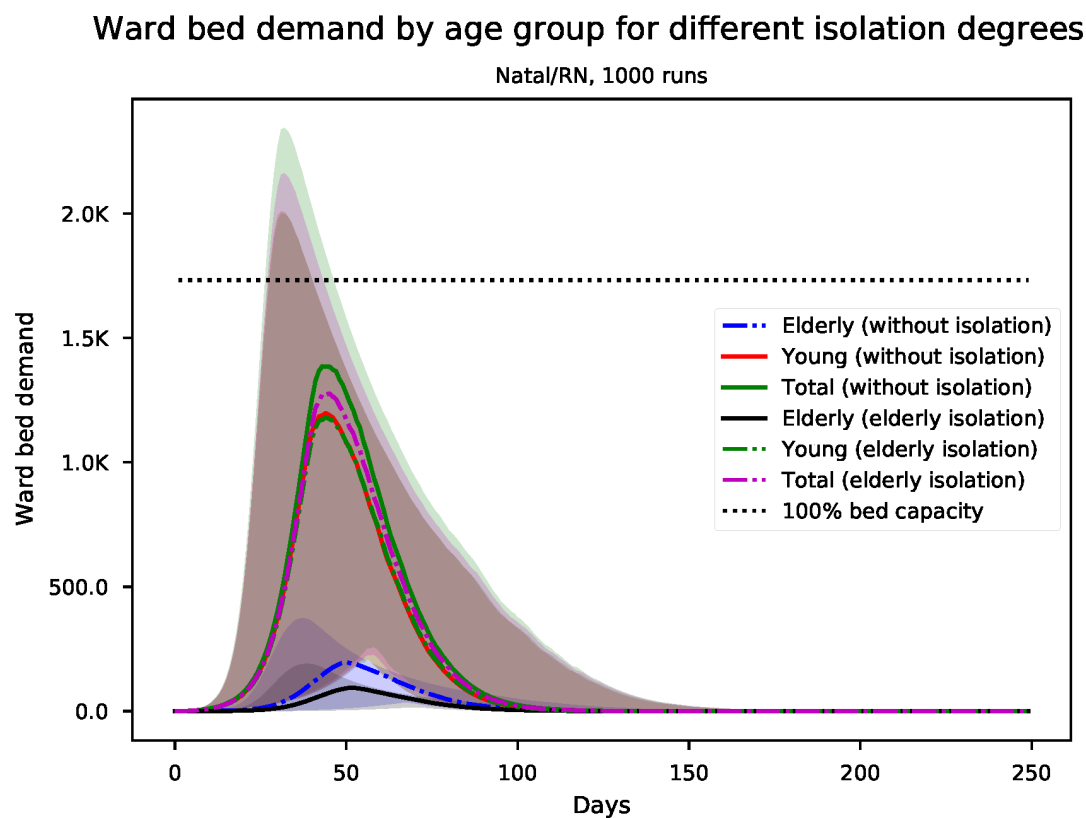

Figure S96: Predicted number of needed ward beds, by age group for Natal

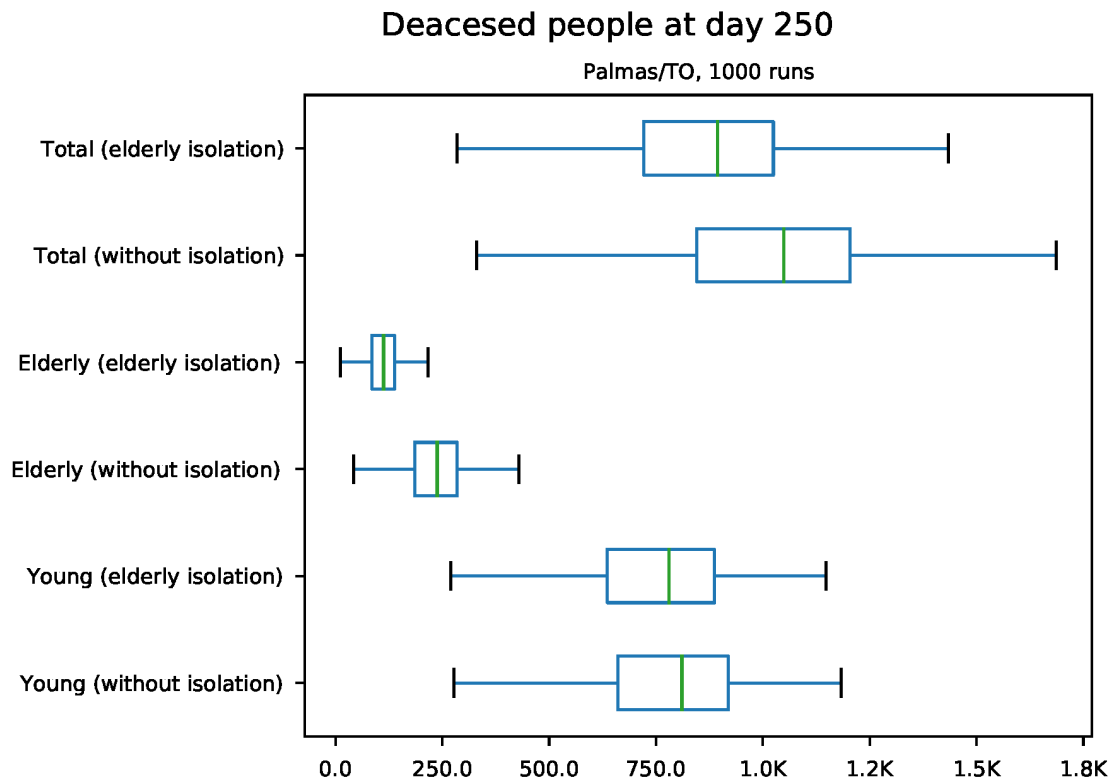

Figure S97: Predicted number of death at day 250 for Palmas

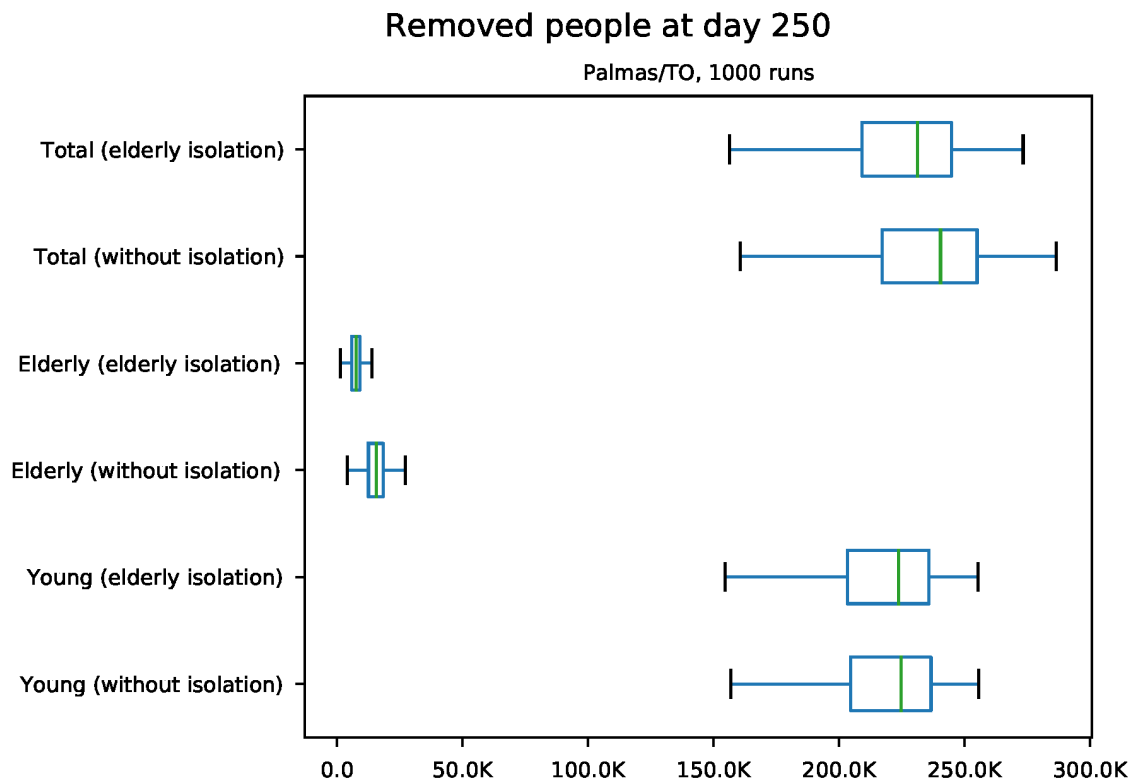

Figure S98: Predicted number of removed individuals at day 250 for Palmas

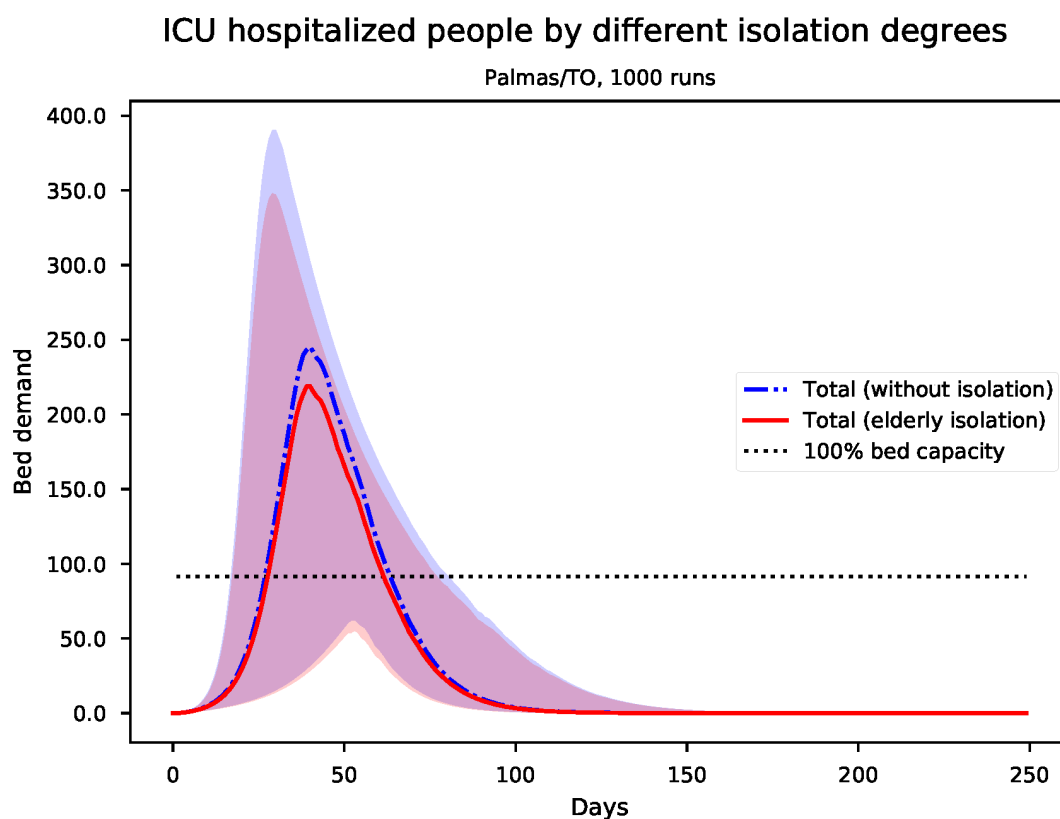

Figure S99: Predicted number of needed ICU beds for Palmas

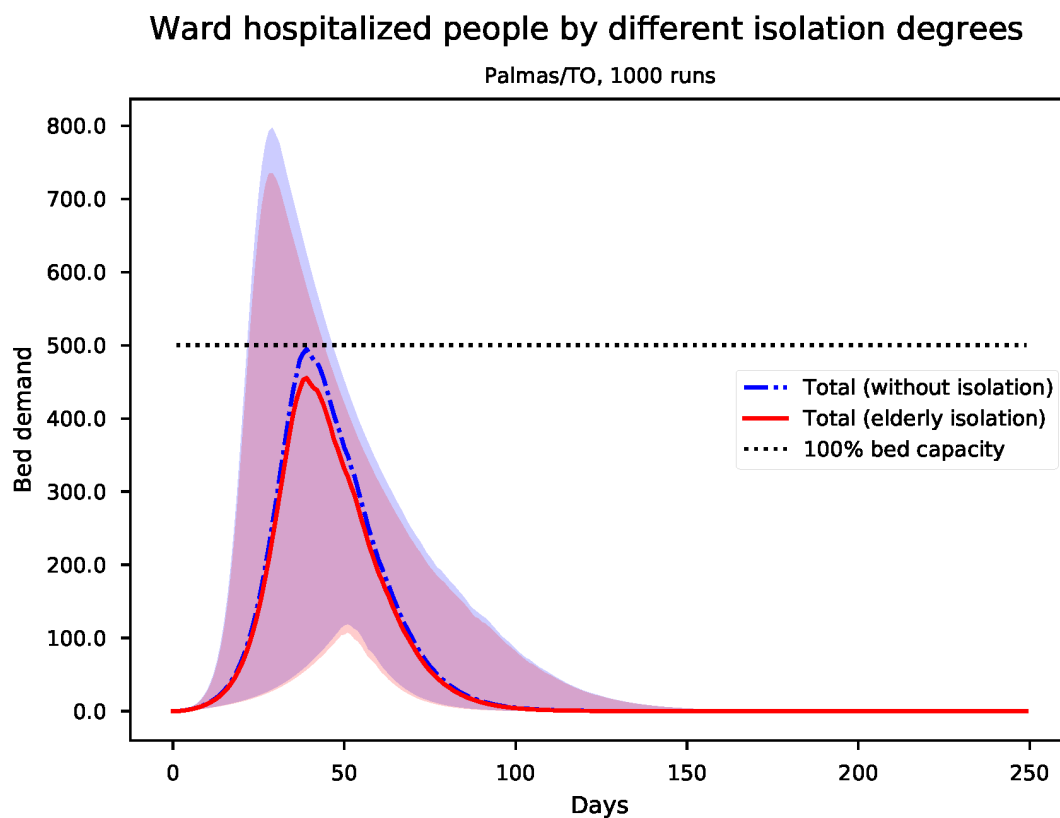

Figure S100: Predicted number of needed ward beds for Palmas

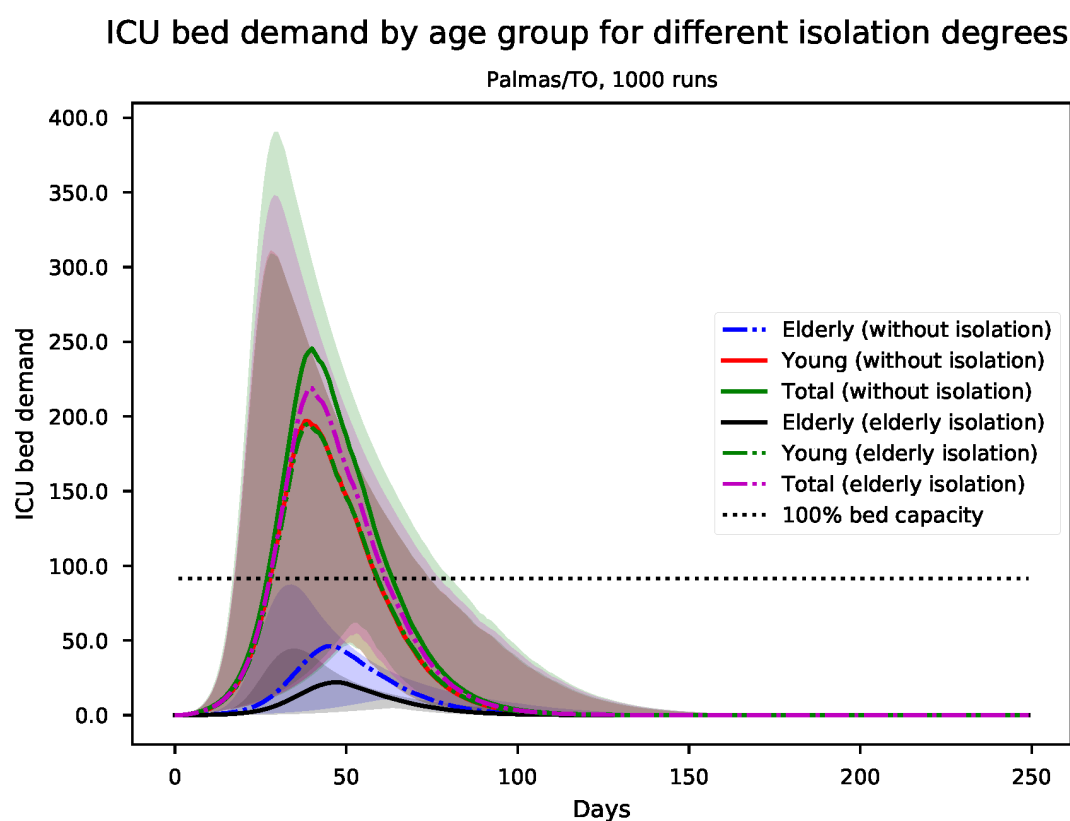

Figure S101: Predicted number of needed ICU beds, by age group for Palmas

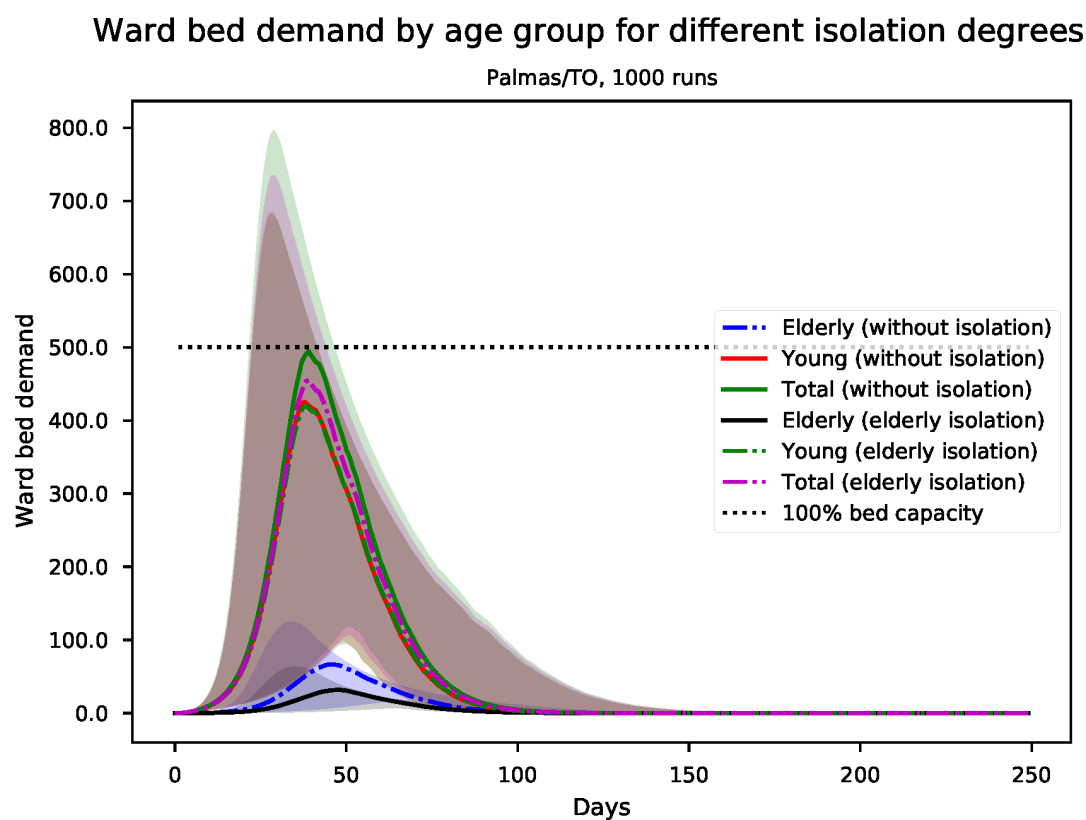

Figure S102: Predicted number of needed ward beds, by age group for Palmas

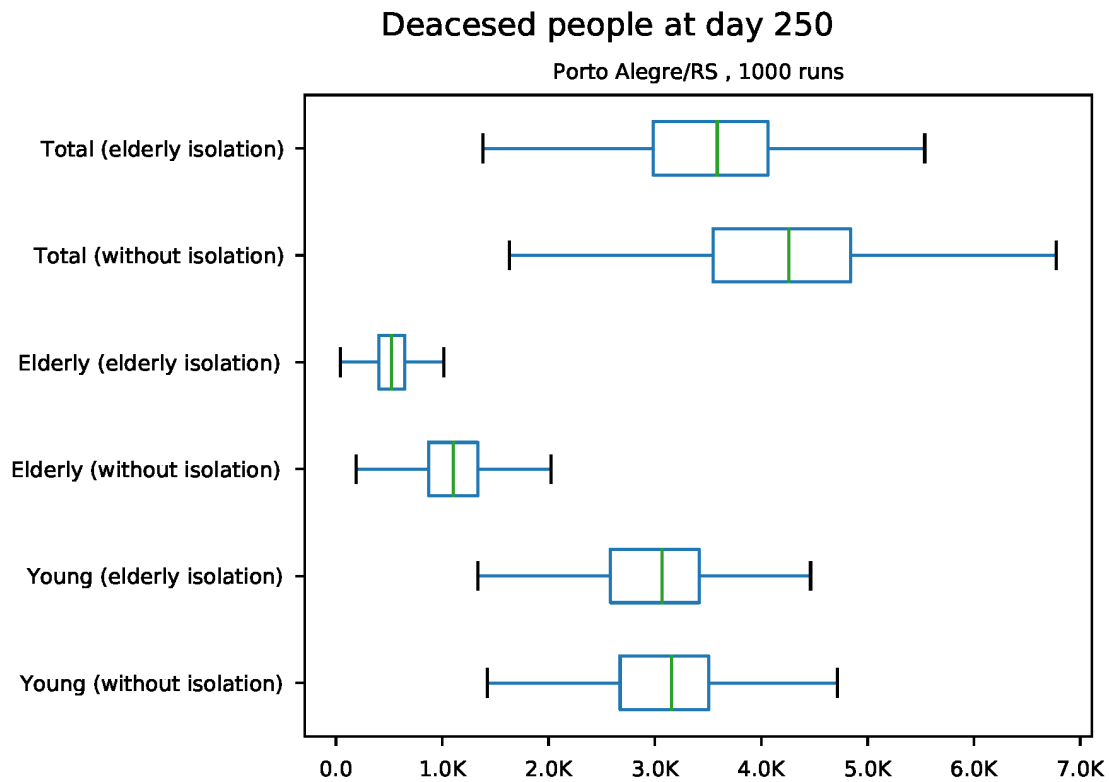

Figure S103: Predicted number of death at day 250 for Porto Alegre

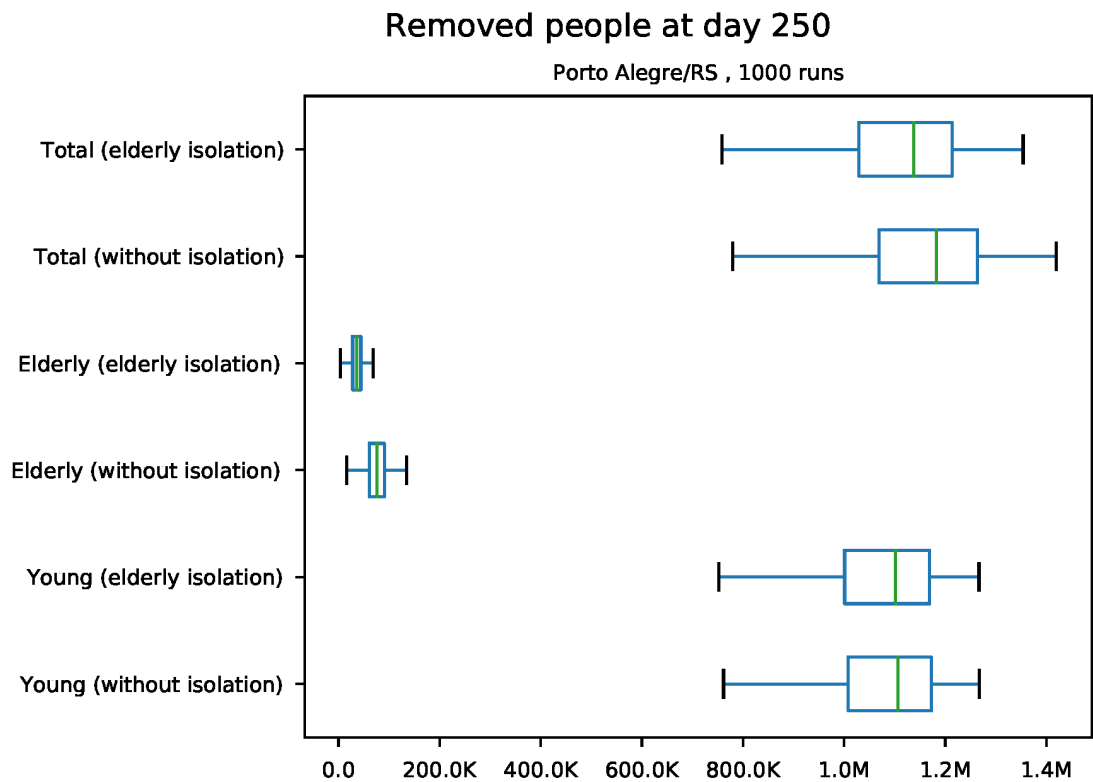

Figure S104: Predicted number of removed individuals at day 250 for Porto Alegre

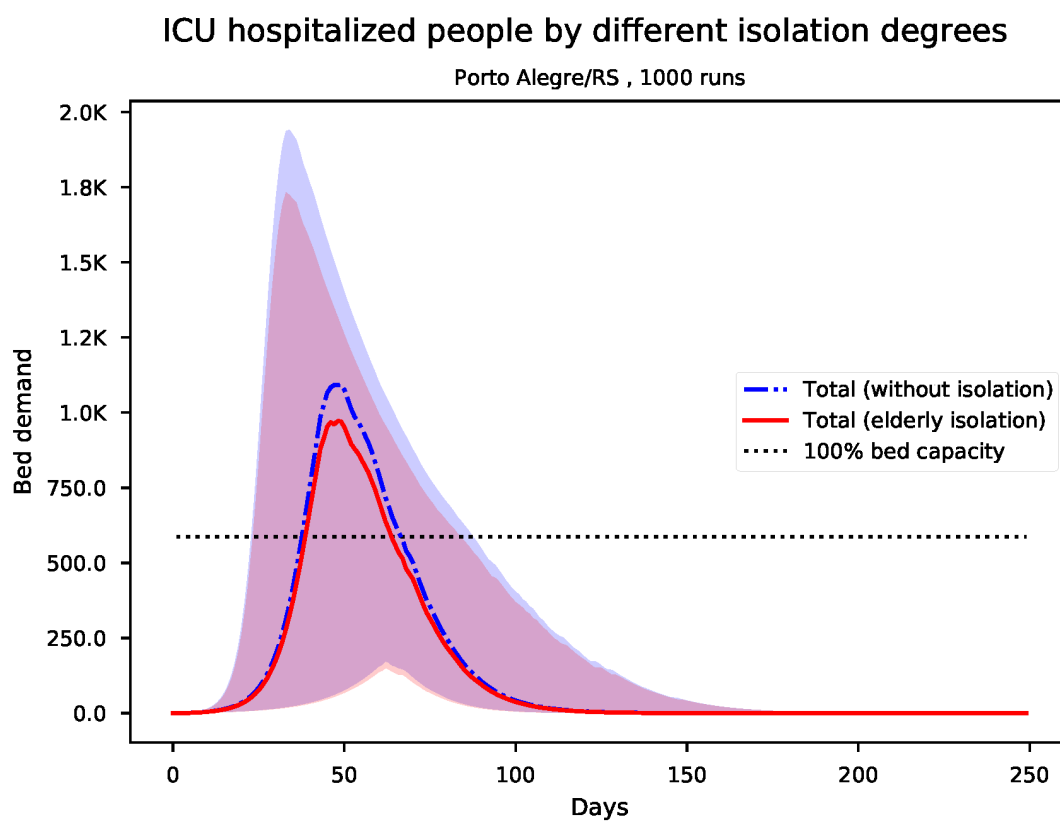

Figure S105: Predicted number of needed ICU beds for Porto Alegre

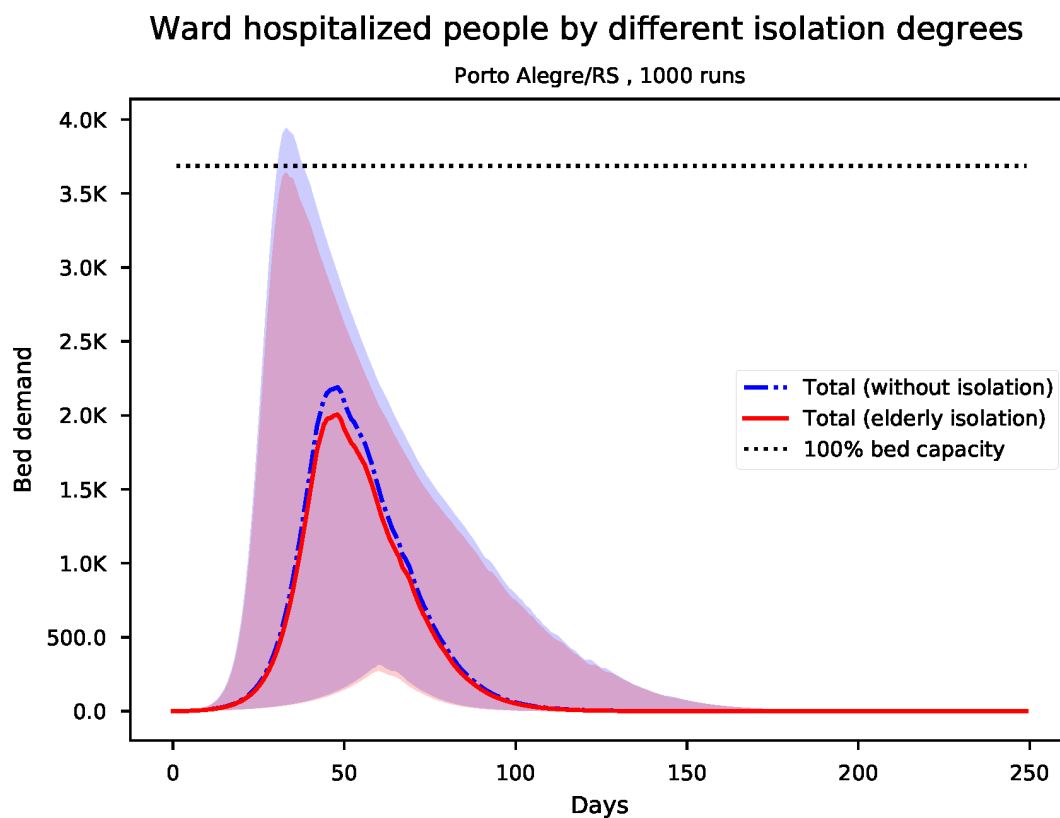

Figure S106: Predicted number of needed ward beds for Porto Alegre

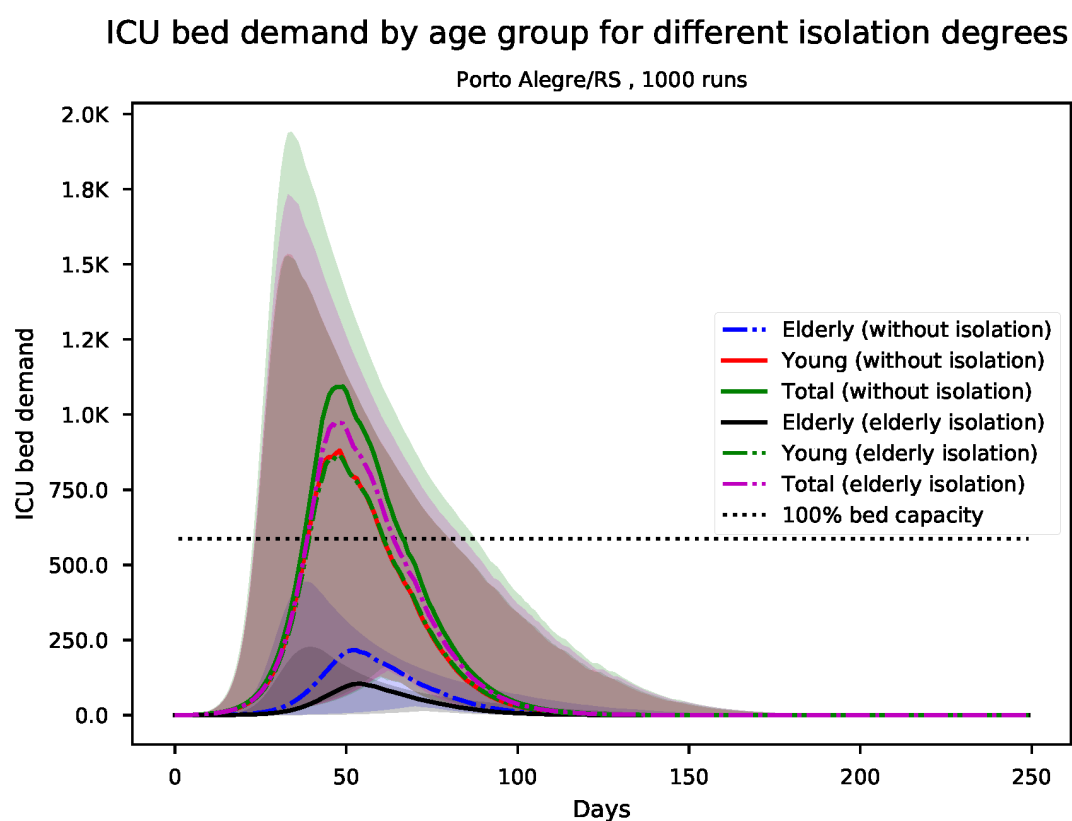

Figure S107: Predicted number of needed ICU beds, by age group for Porto Alegre

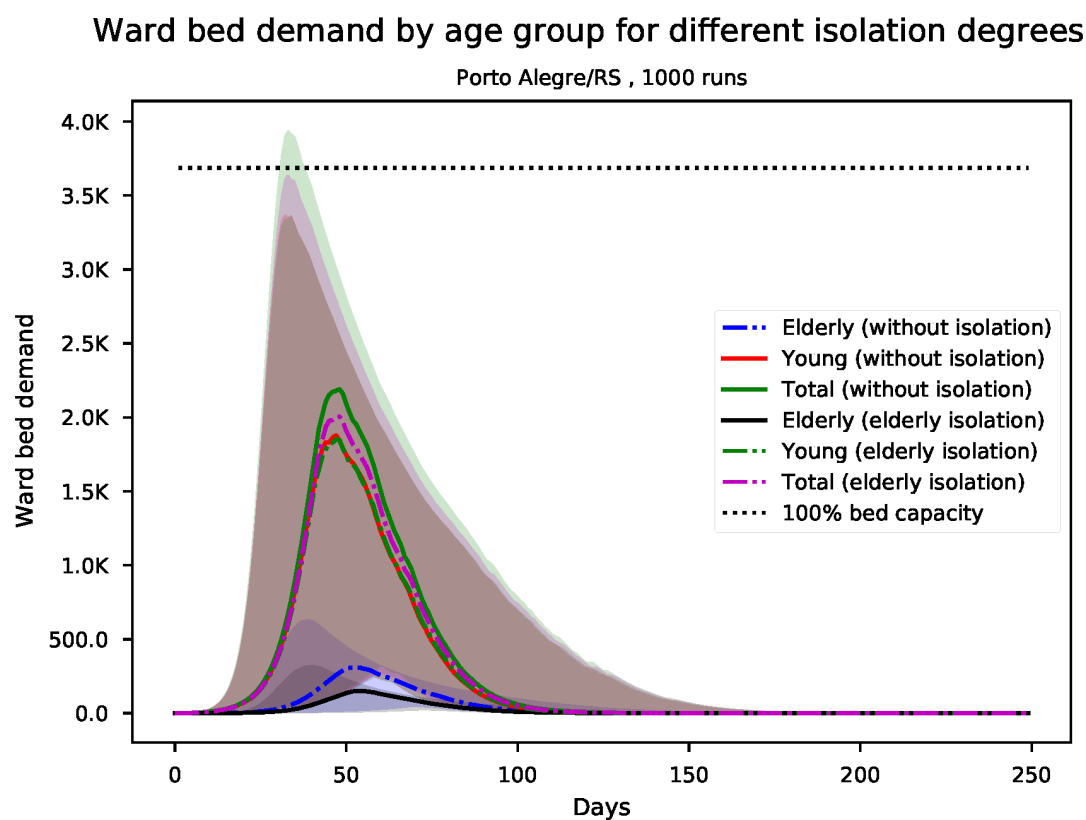

Figure S108: Predicted number of needed ward beds, by age group for Porto Alegre

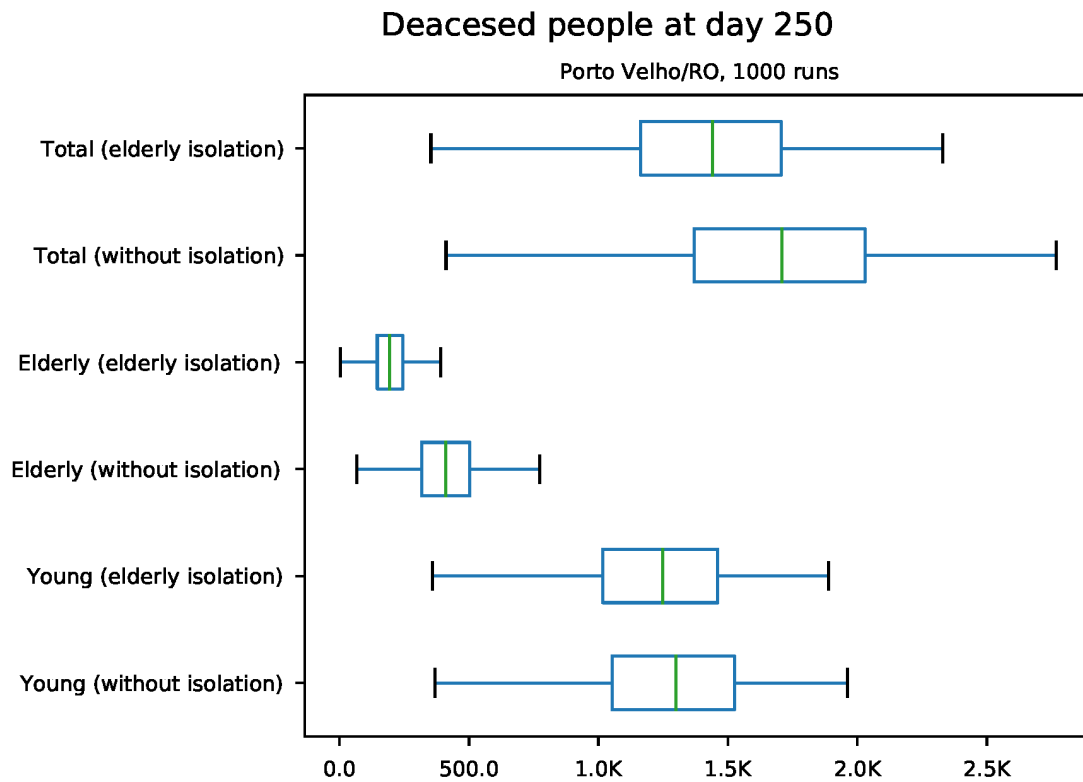

Figure S109: Predicted number of death at day 250 for Porto Velho

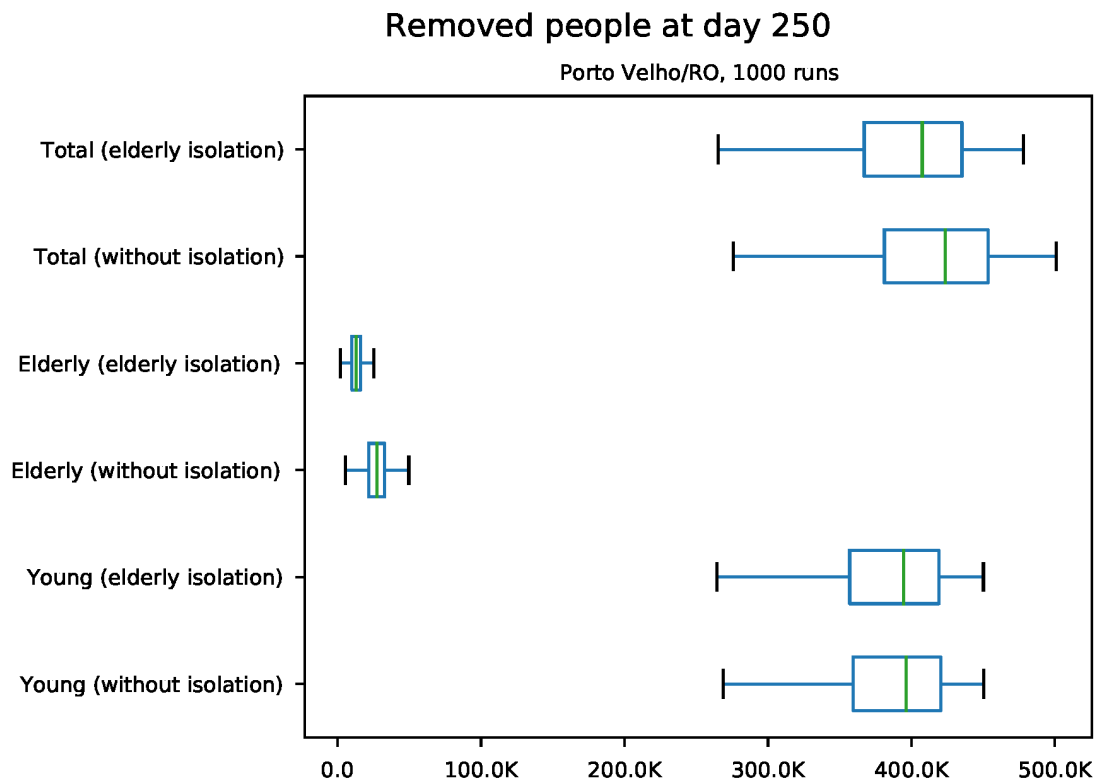

Figure S110: Predicted number of removed individuals at day 250 for Porto Velho

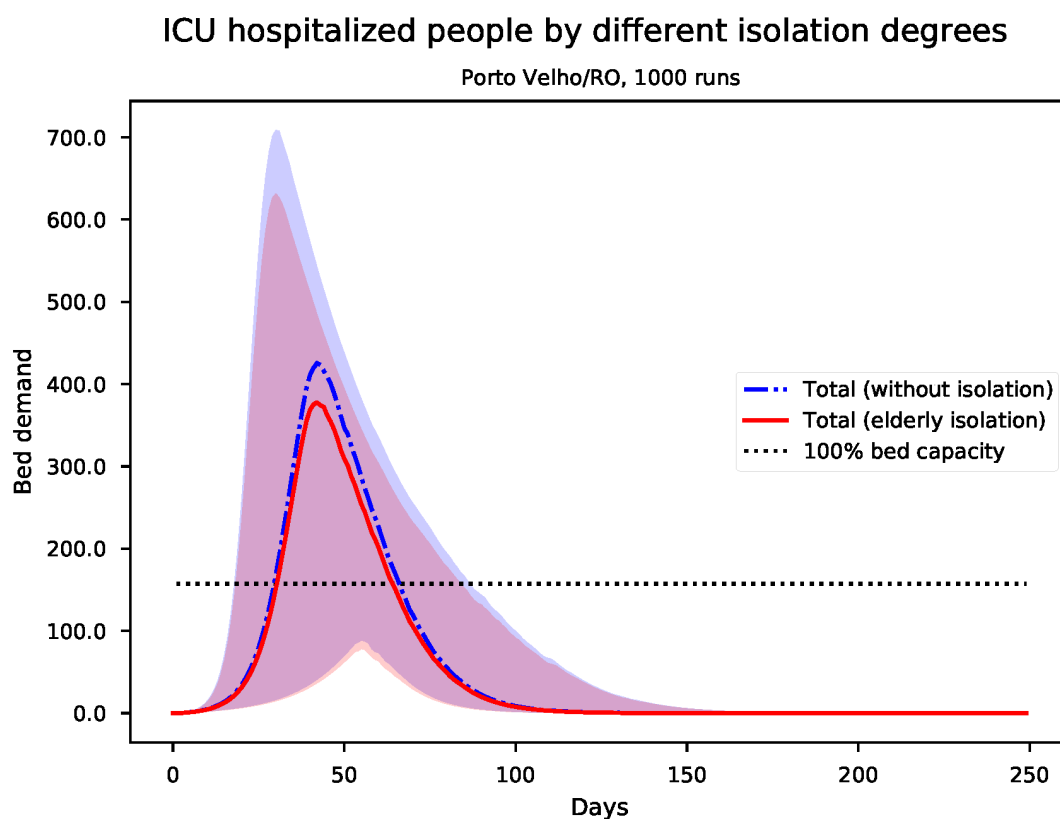

Figure S111: Predicted number of needed ICU beds for Porto Velho

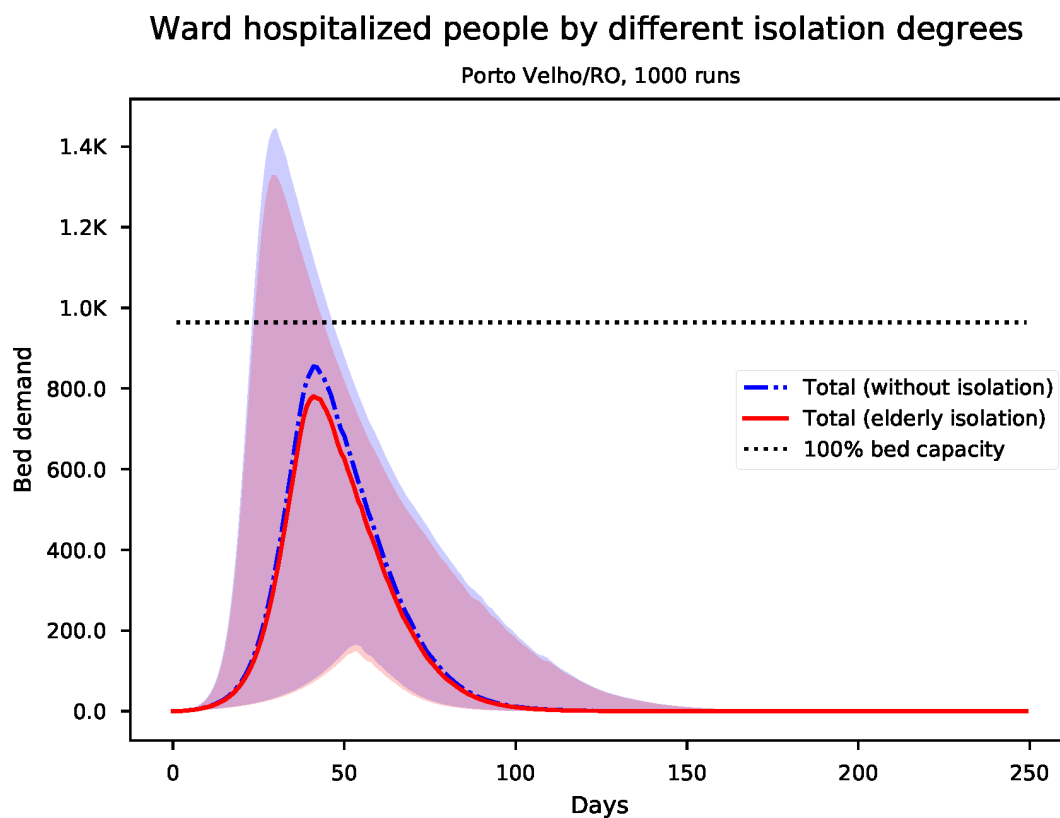

Figure S112: Predicted number of needed ward beds for Porto Velho

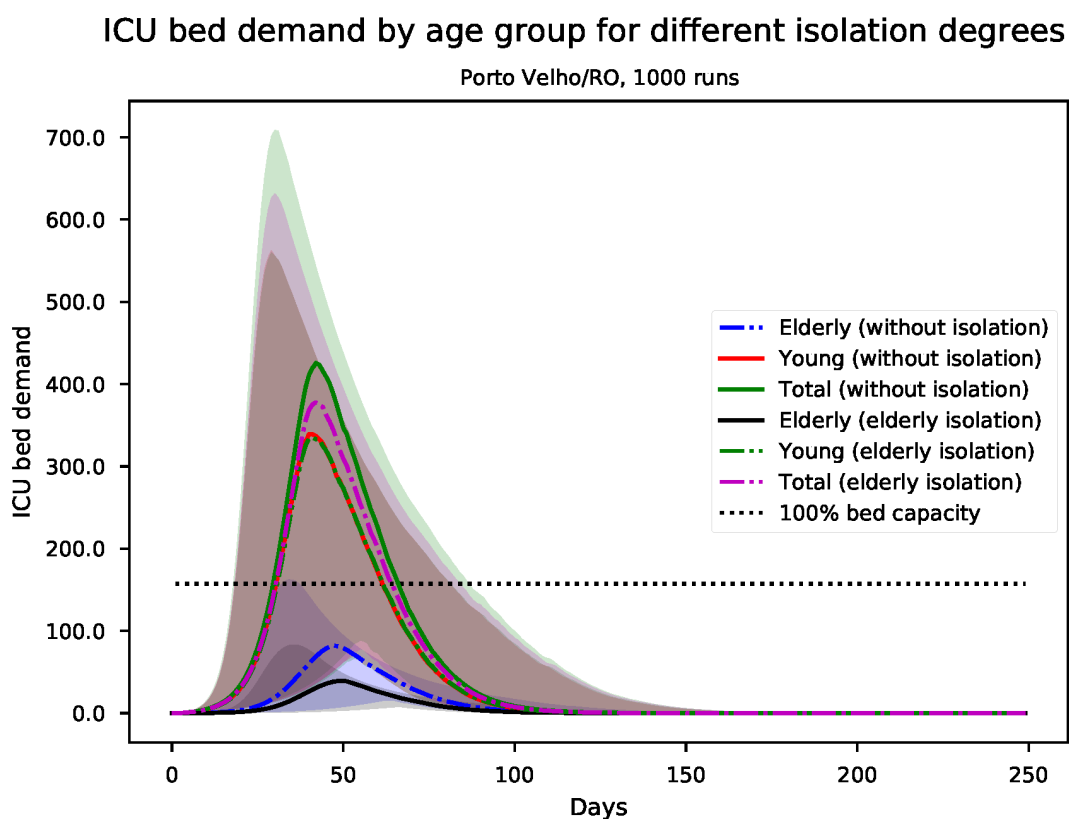

Figure S113: Predicted number of needed ICU beds, by age group for Porto Velho

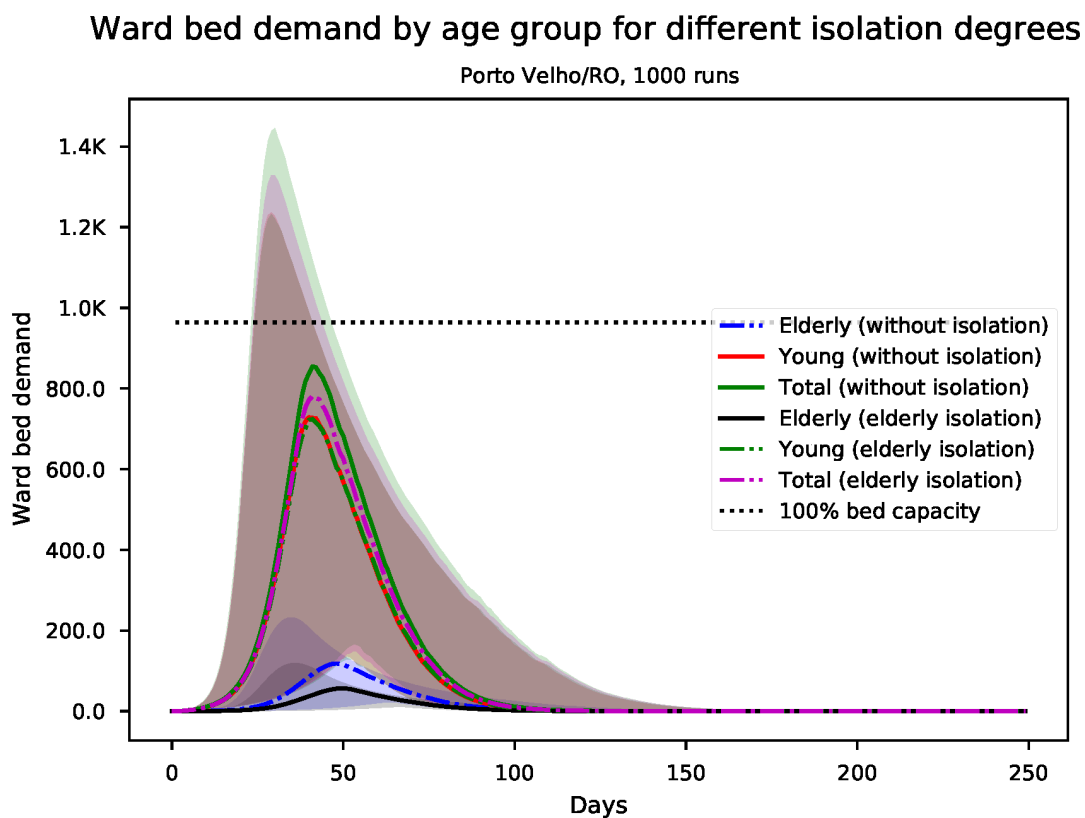

Figure S114: Predicted number of needed ward beds, by age group for Porto Velho

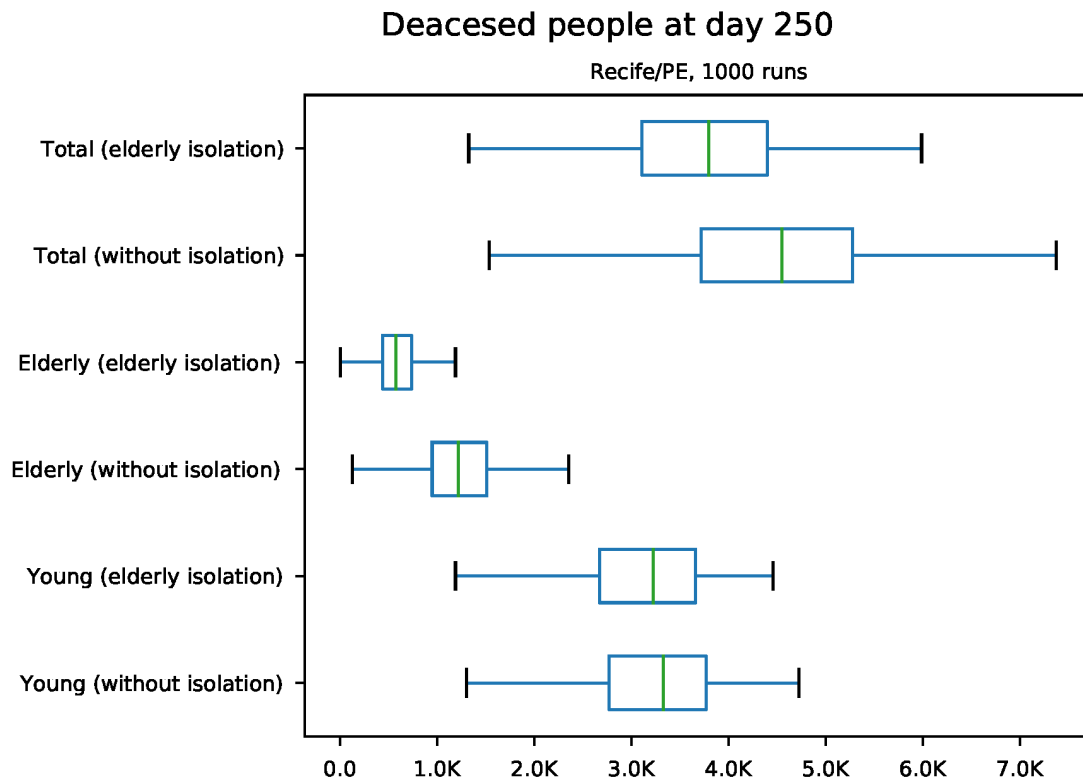

Figure S115: Predicted number of death at day 250 for Recife

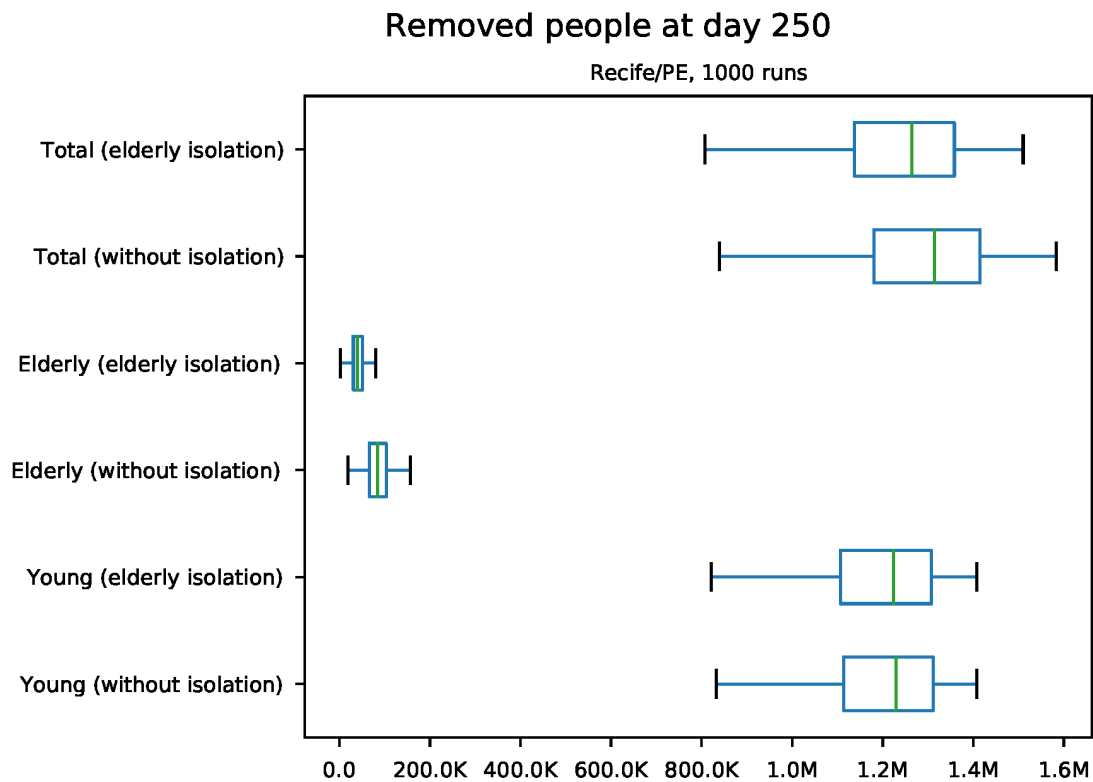

Figure S116: Predicted number of removed individuals at day 250 for Recife

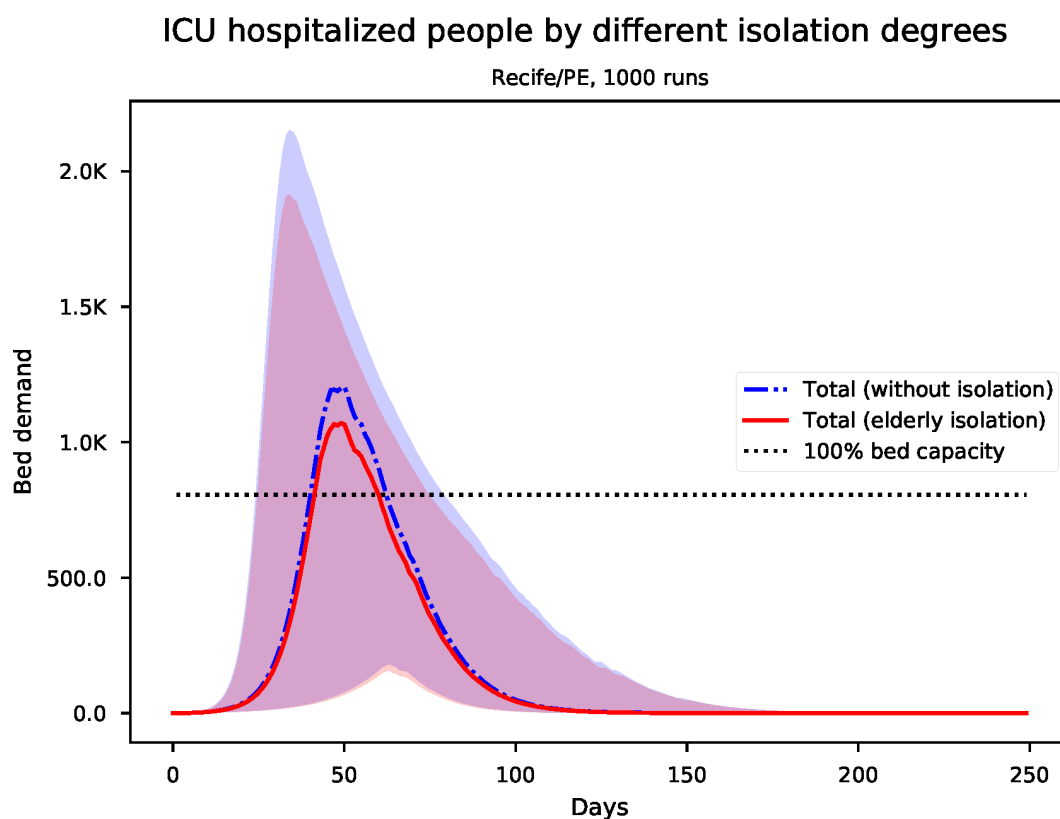

Figure S117: Predicted number of needed ICU beds for Recife

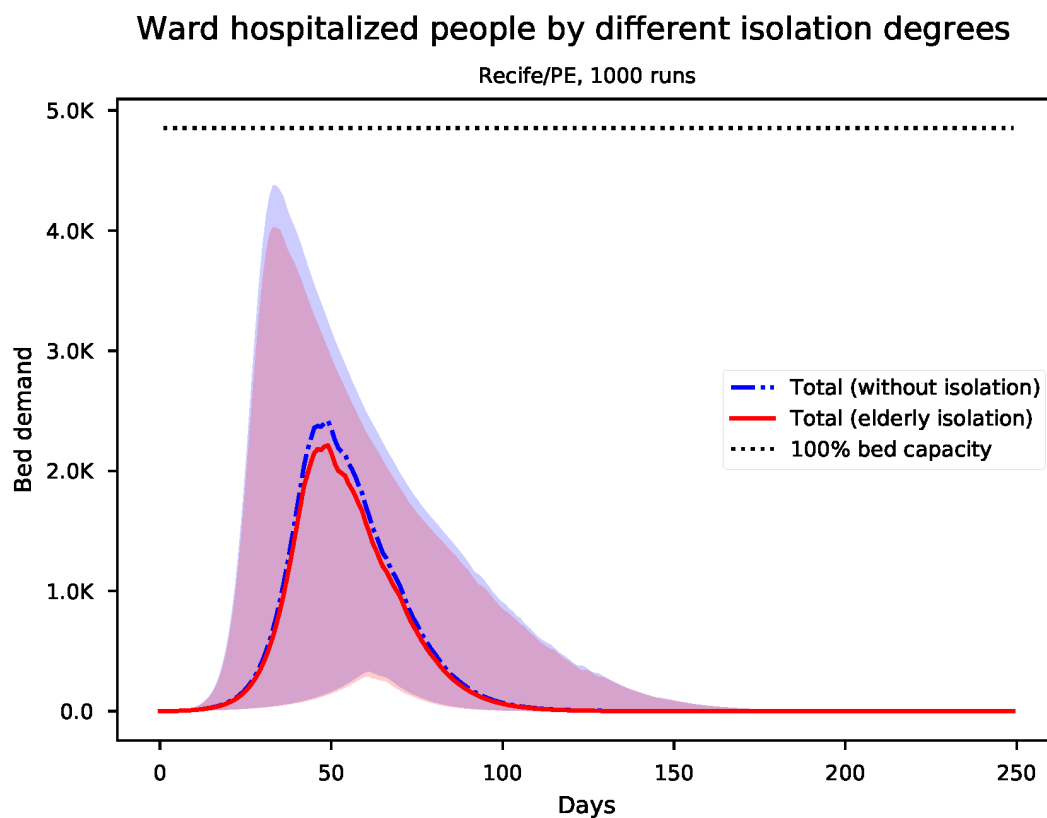

Figure S118: Predicted number of needed ward beds for Recife

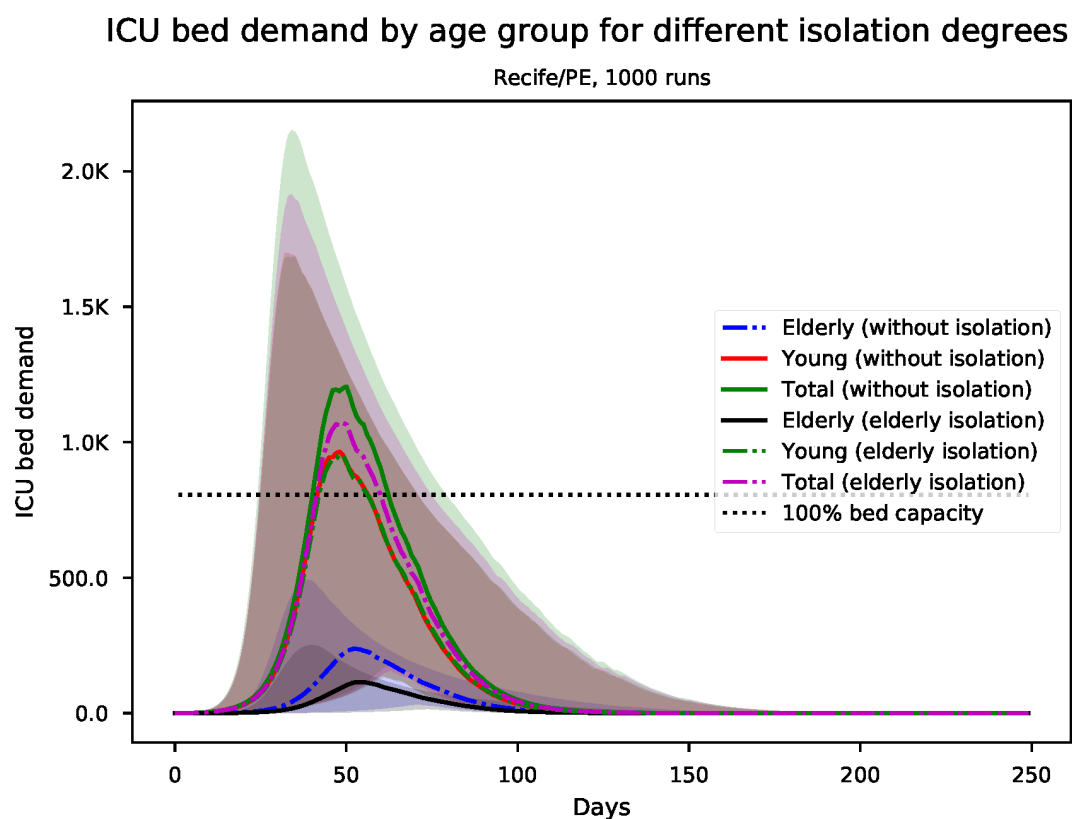

Figure S119: Predicted number of needed ICU beds, by age group for Recife

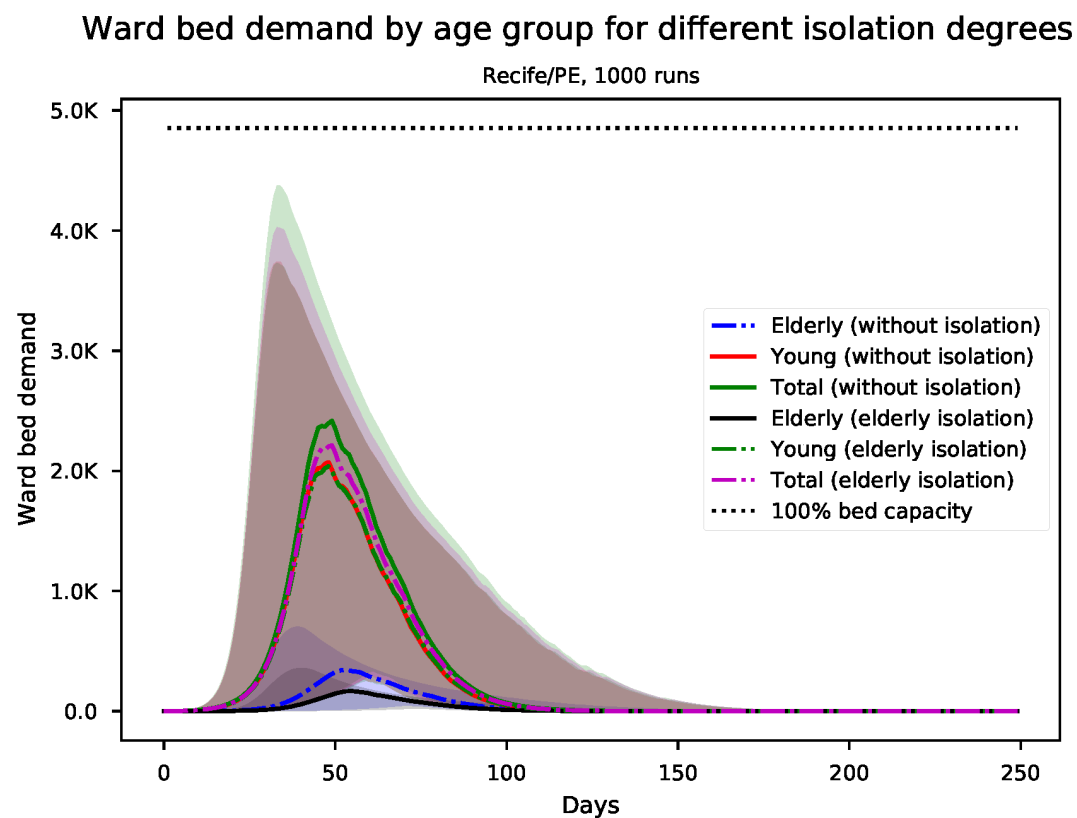

Figure S120: Predicted number of needed ward beds, by age group for Recife

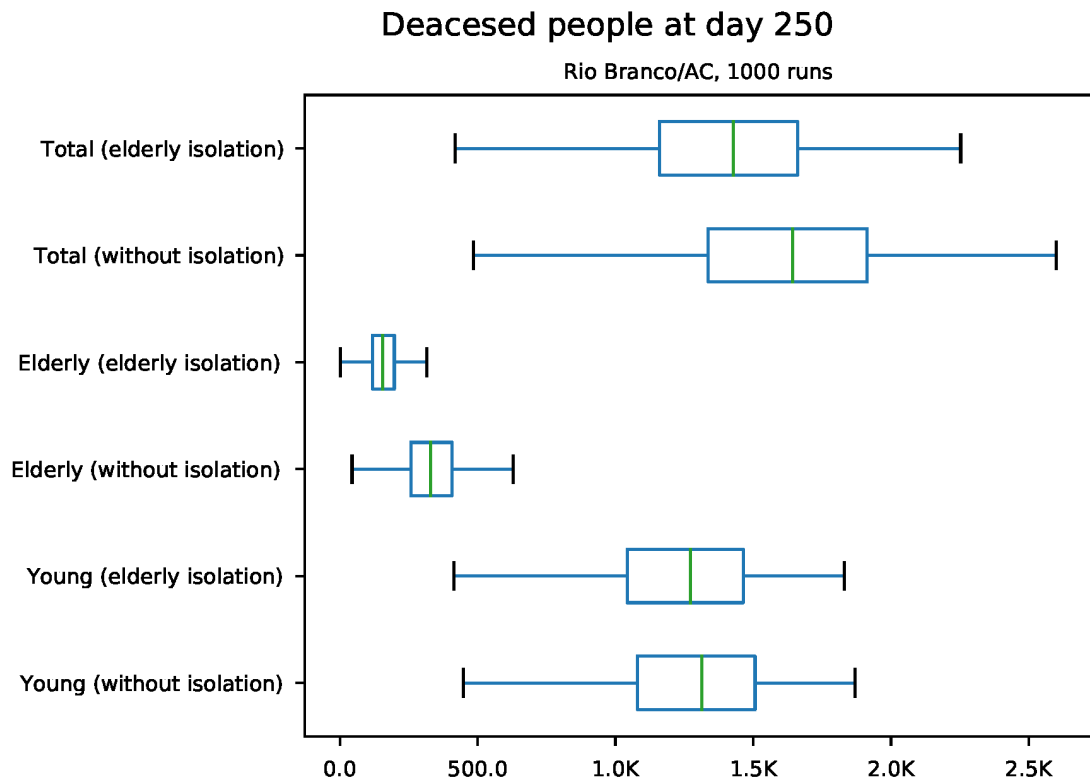

Figure S121: Predicted number of death at day 250 for Rio Branco

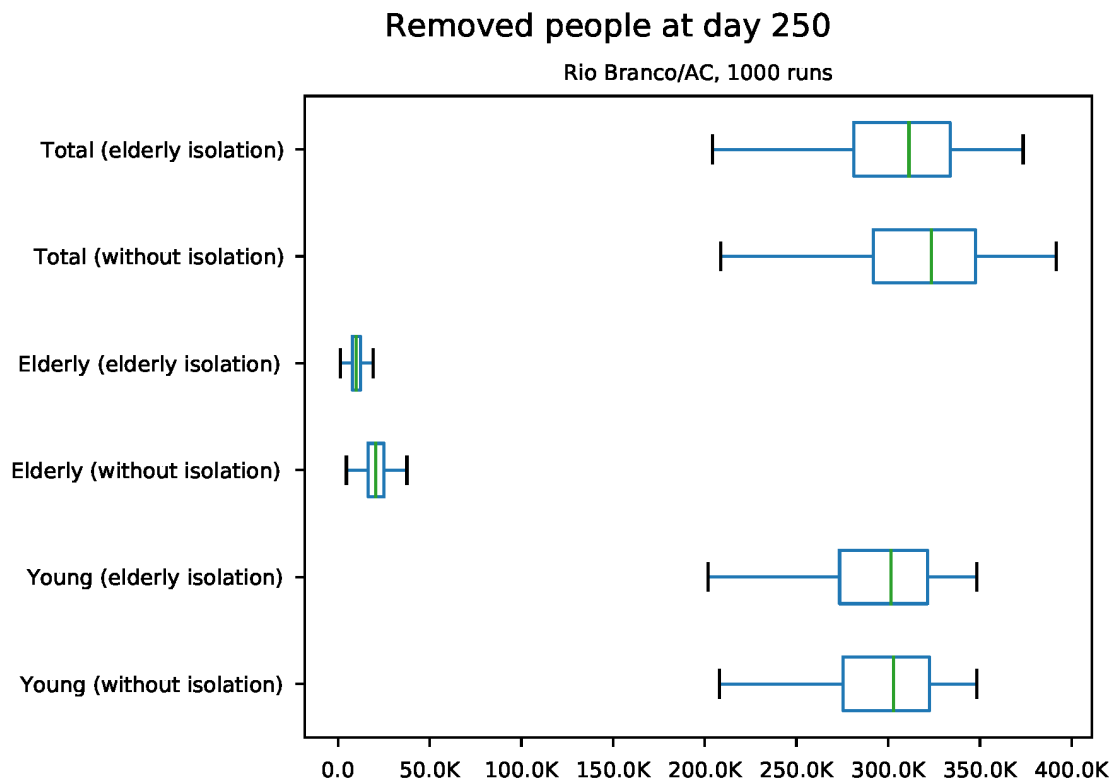

Figure S122: Predicted number of removed individuals at day 250 for Rio Branco

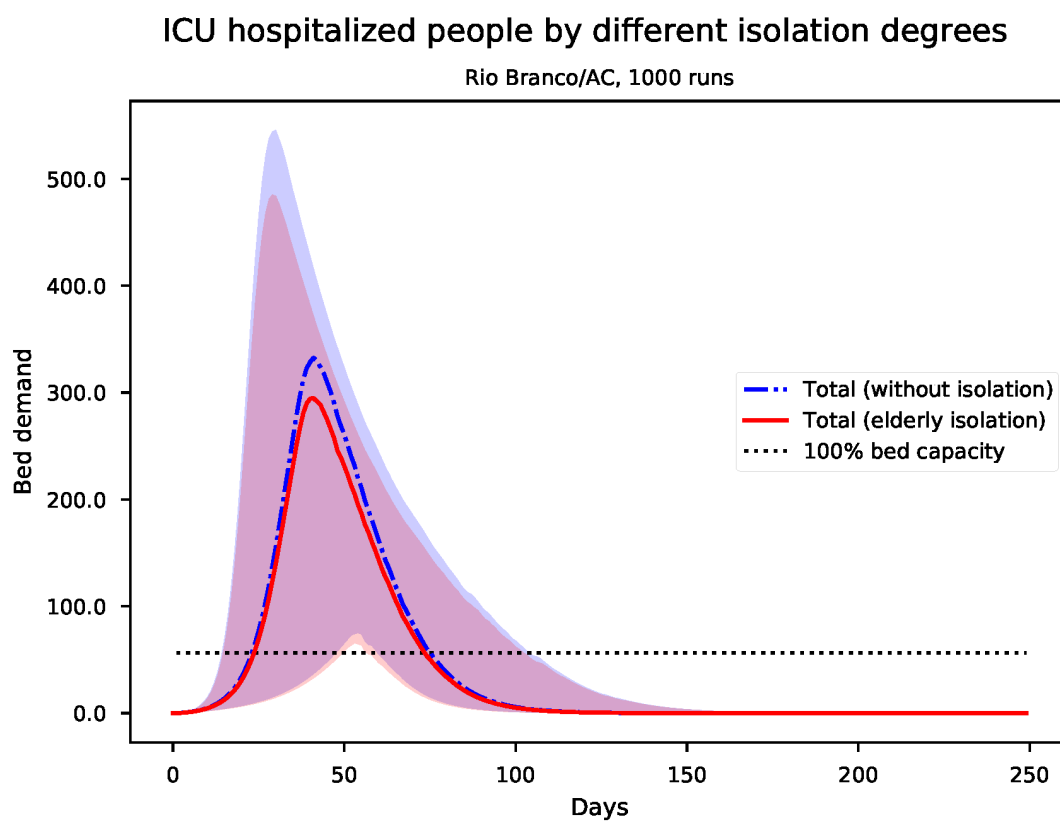

Figure S123: Predicted number of needed ICU beds for Rio Branco

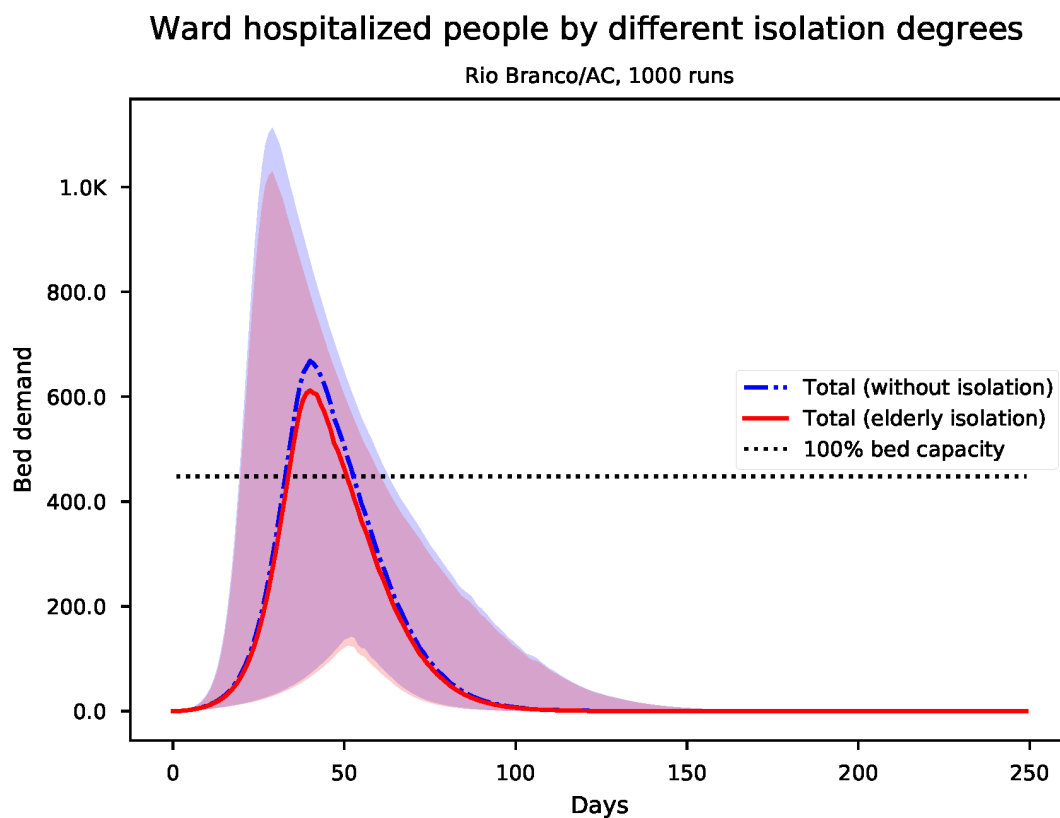

Figure S124: Predicted number of needed ward beds for Rio Branco

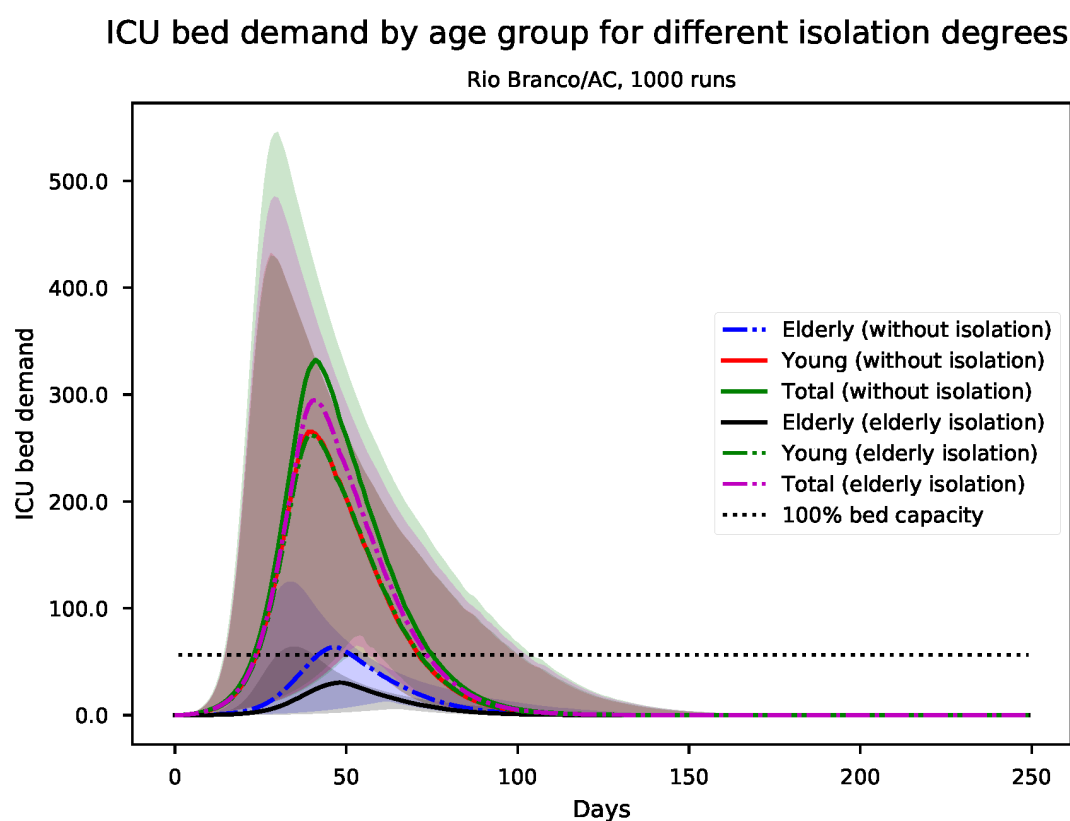

Figure S125: Predicted number of needed ICU beds, by age group for Rio Branco

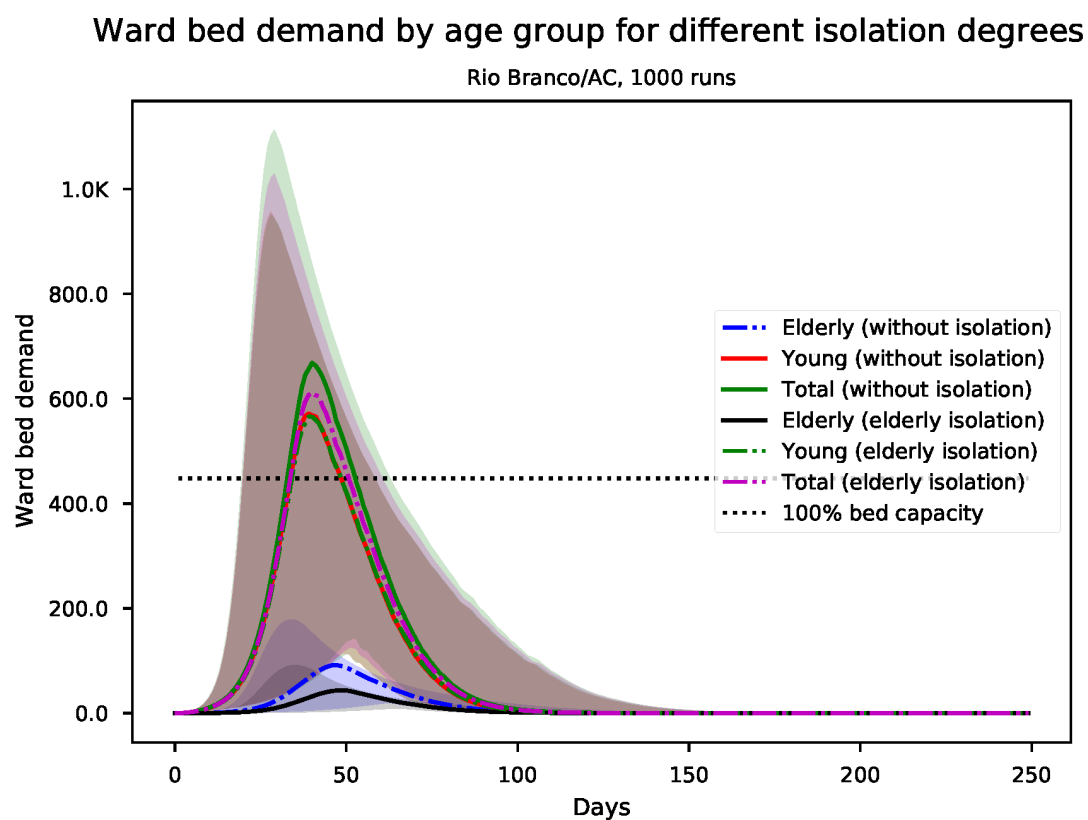

Figure S126: Predicted number of needed ward beds, by age group for Rio Branco

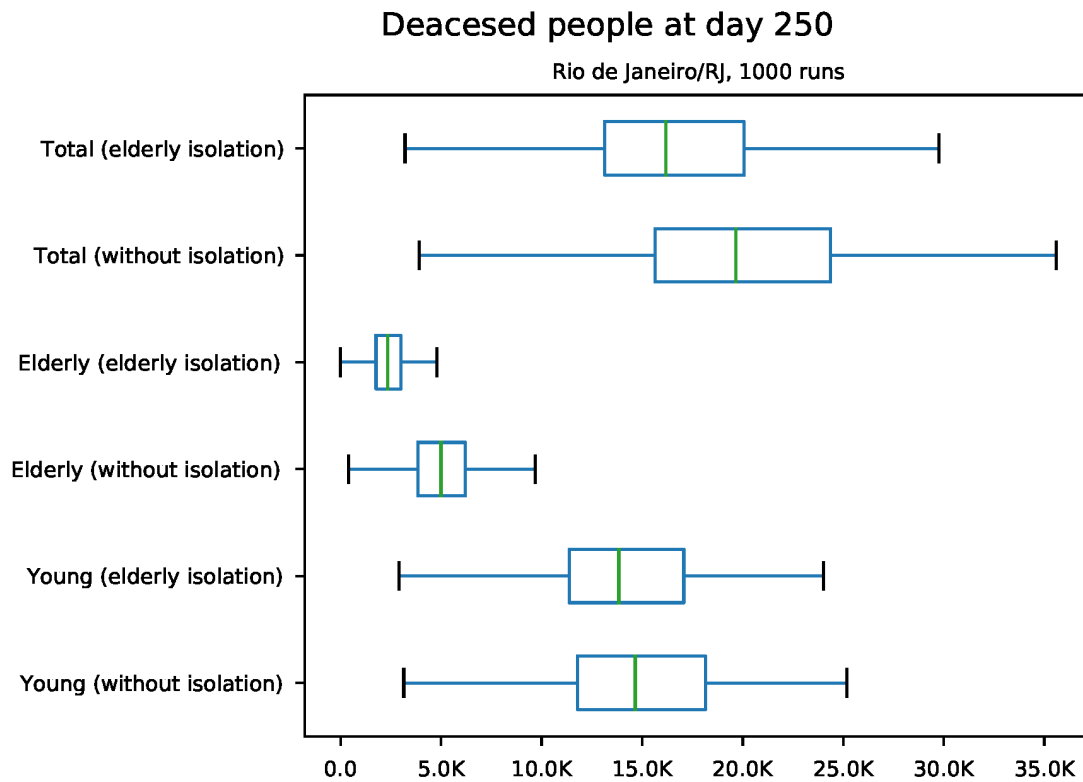

Figure S127: Predicted number of death at day 250 for Rio de Janeiro

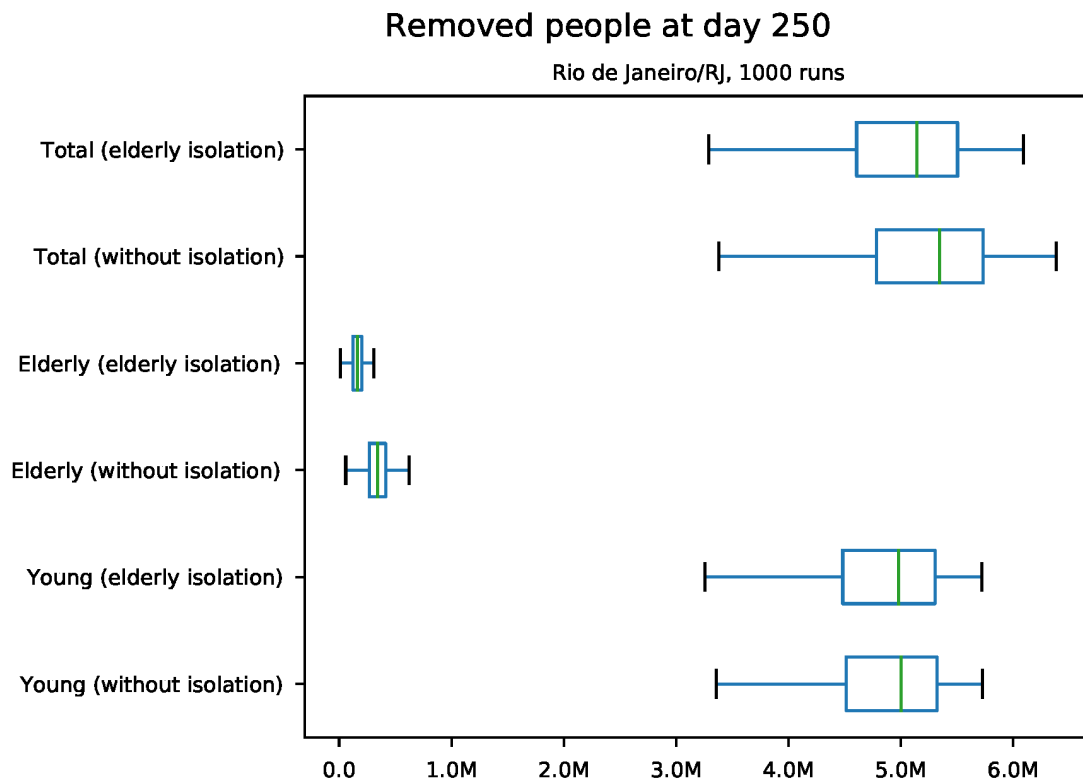

Figure S128: Predicted number of removed individuals at day 250 for Rio de Janeiro

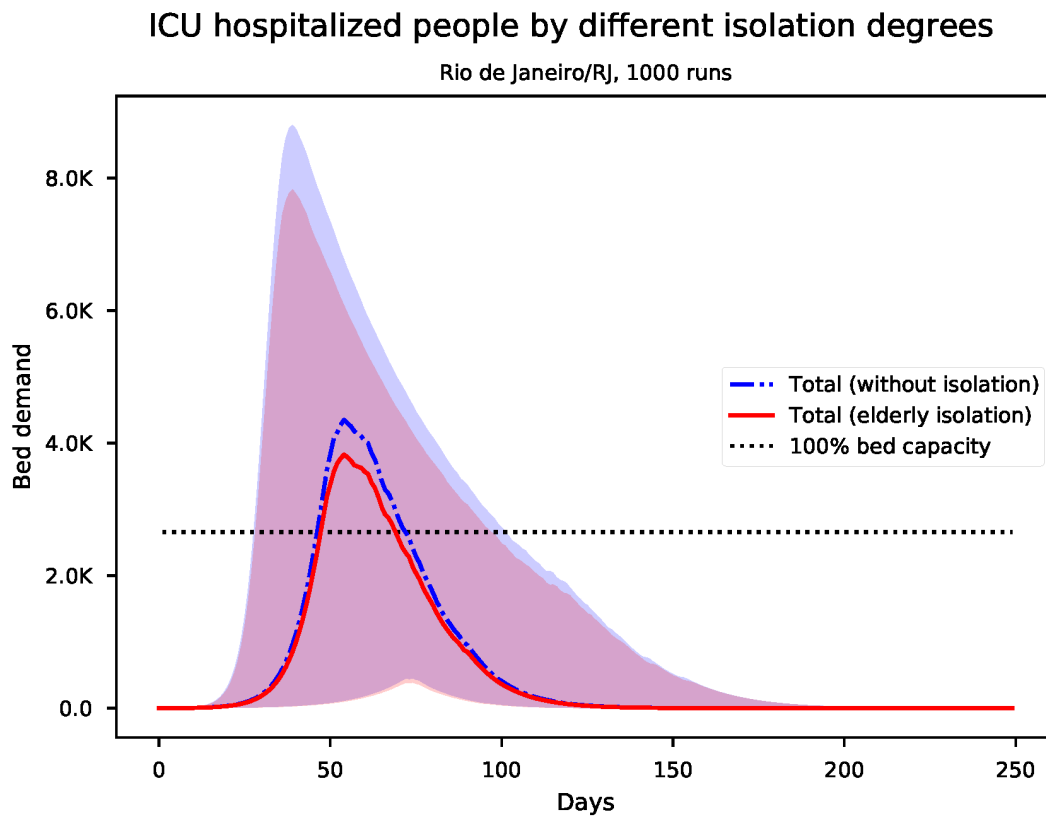

Figure S129: Predicted number of needed ICU beds for Rio de Janeiro

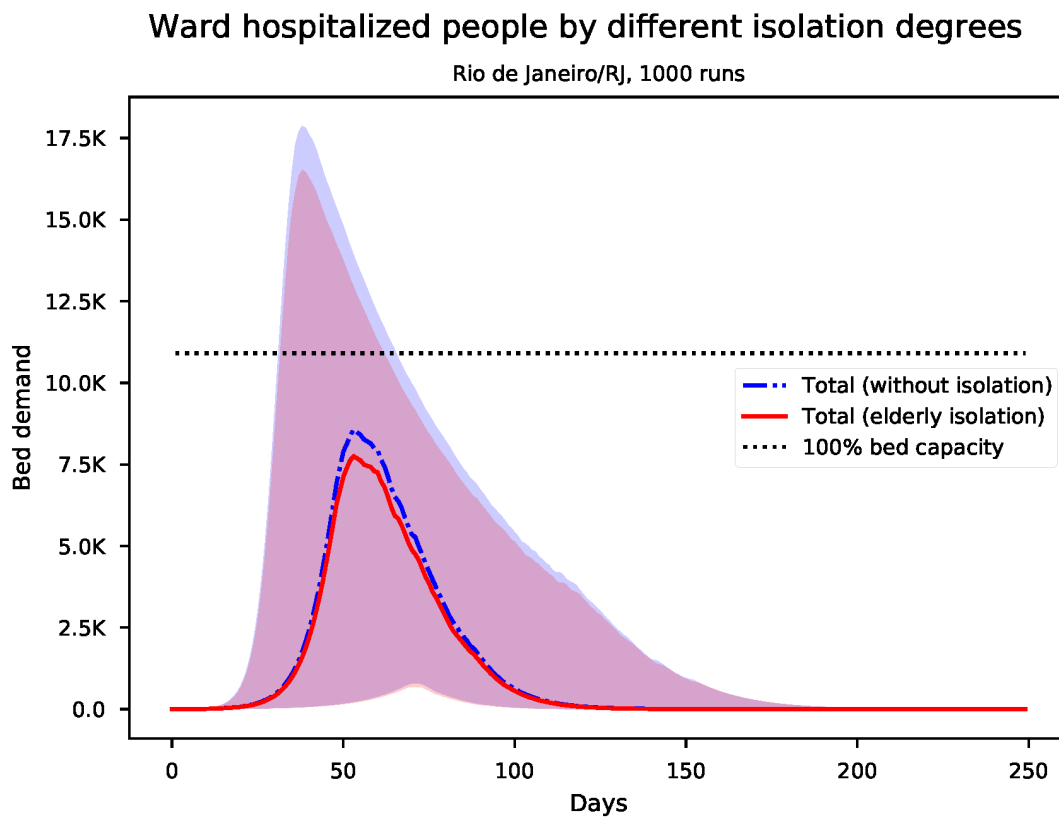

Figure S130: Predicted number of needed ward beds for Rio de Janeiro

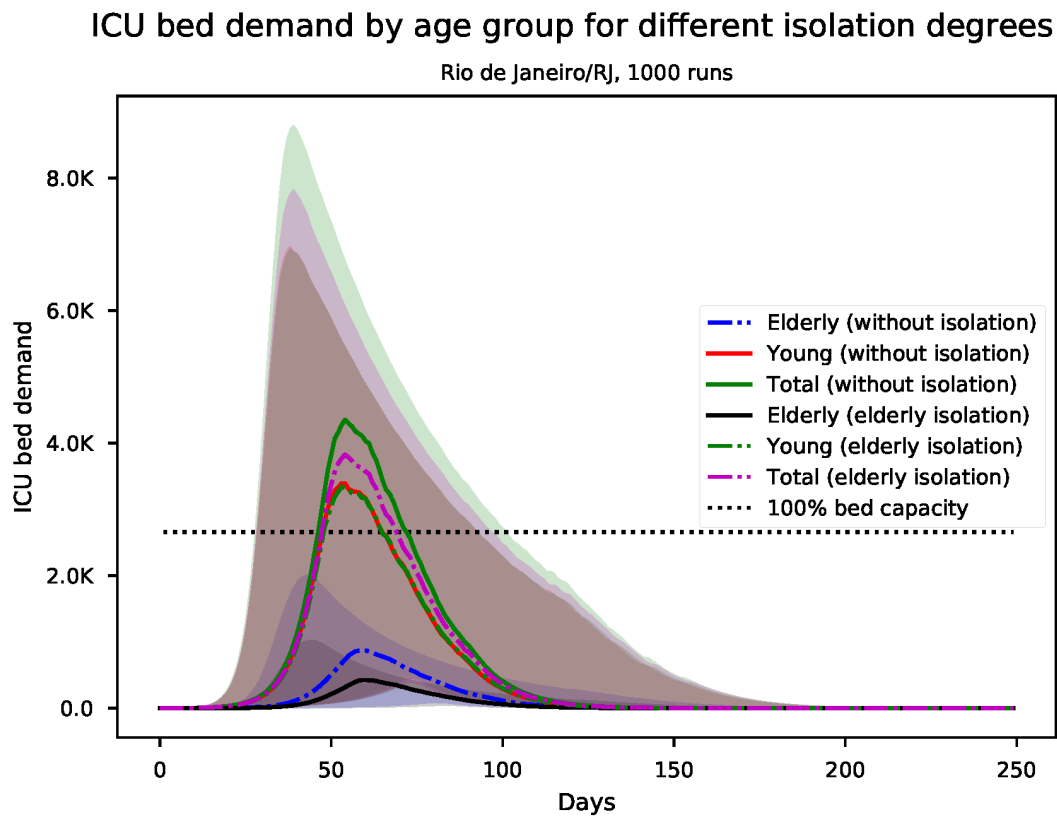

Figure S131: Predicted number of needed ICU beds, by age group for Rio de Janeiro

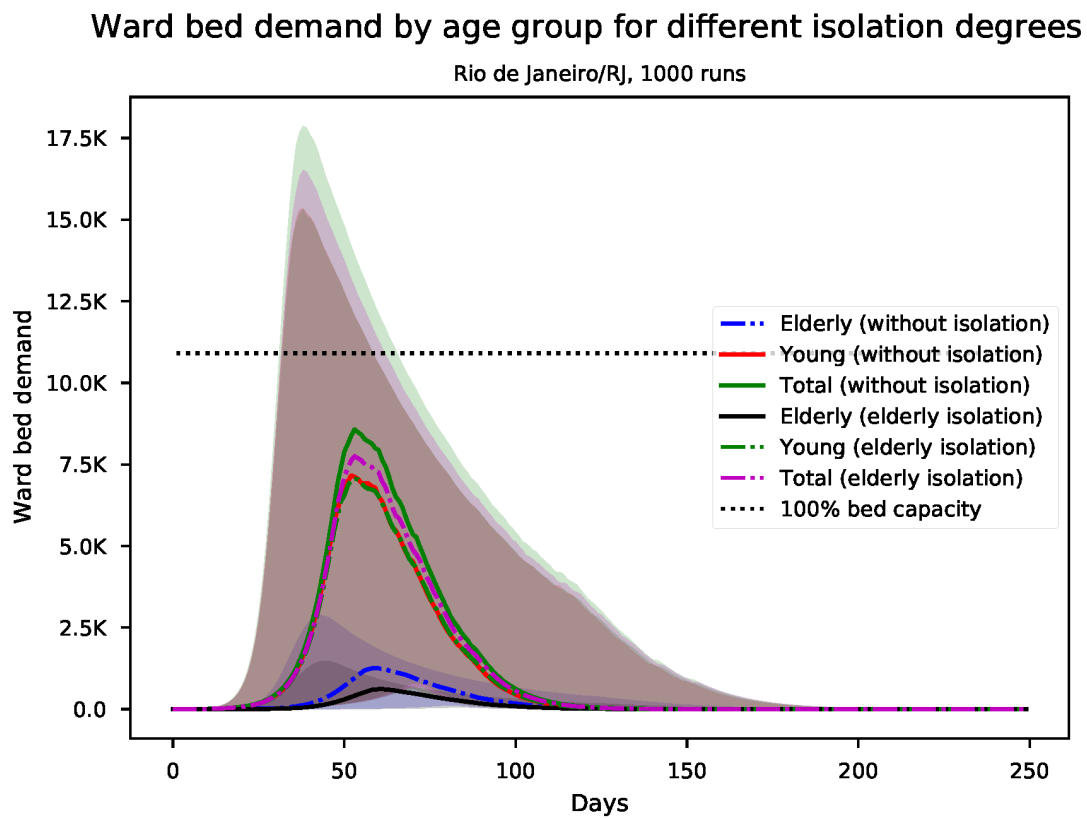

Figure S132: Predicted number of needed ward beds, by age group for Rio de Janeiro

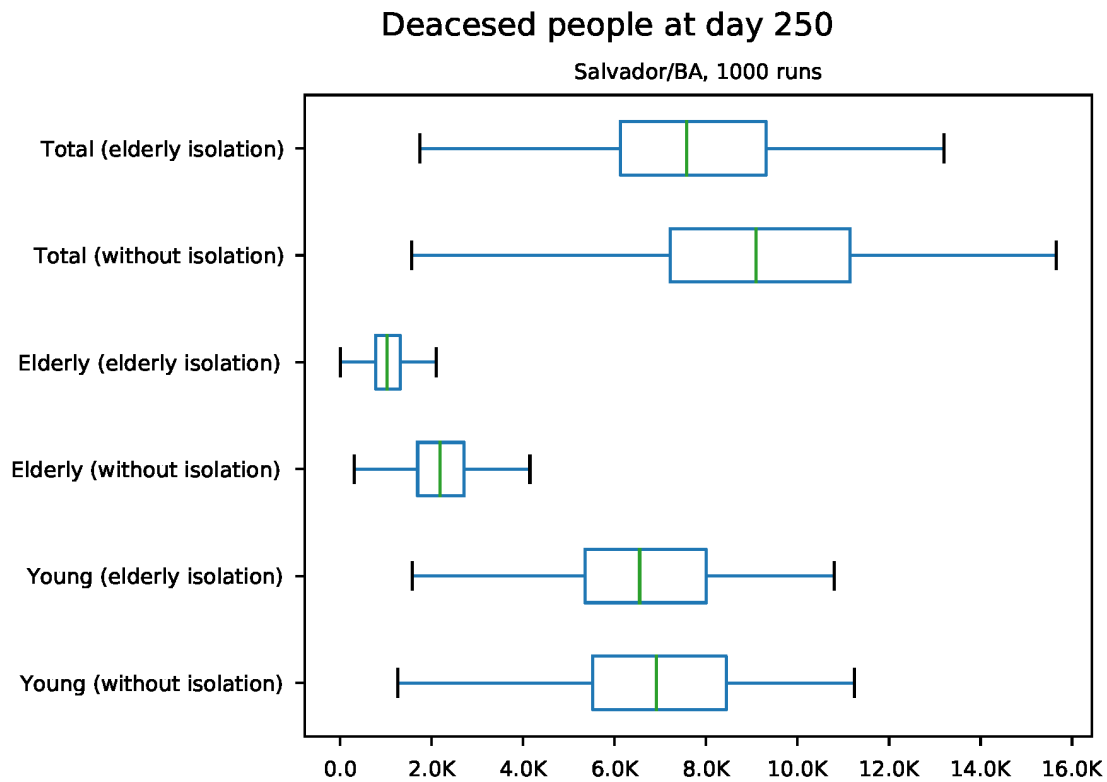

Figure S133: Predicted number of death at day 250 for Salvador

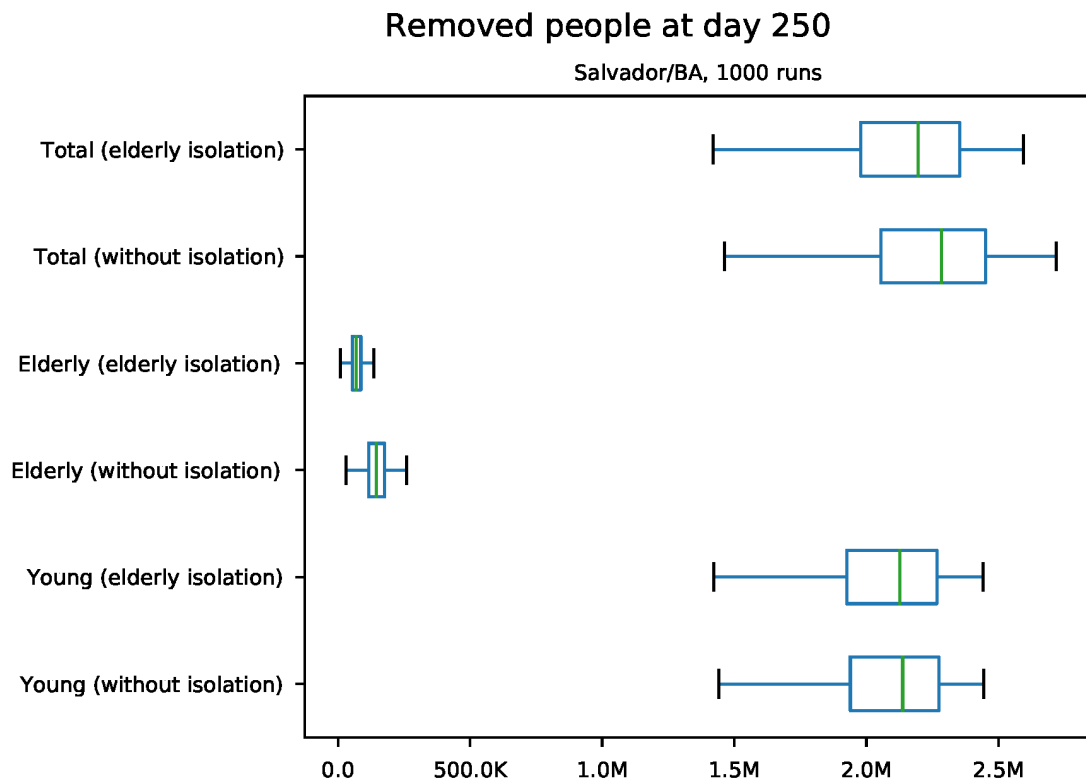

Figure S134: Predicted number of removed individuals at day 250 for Salvador

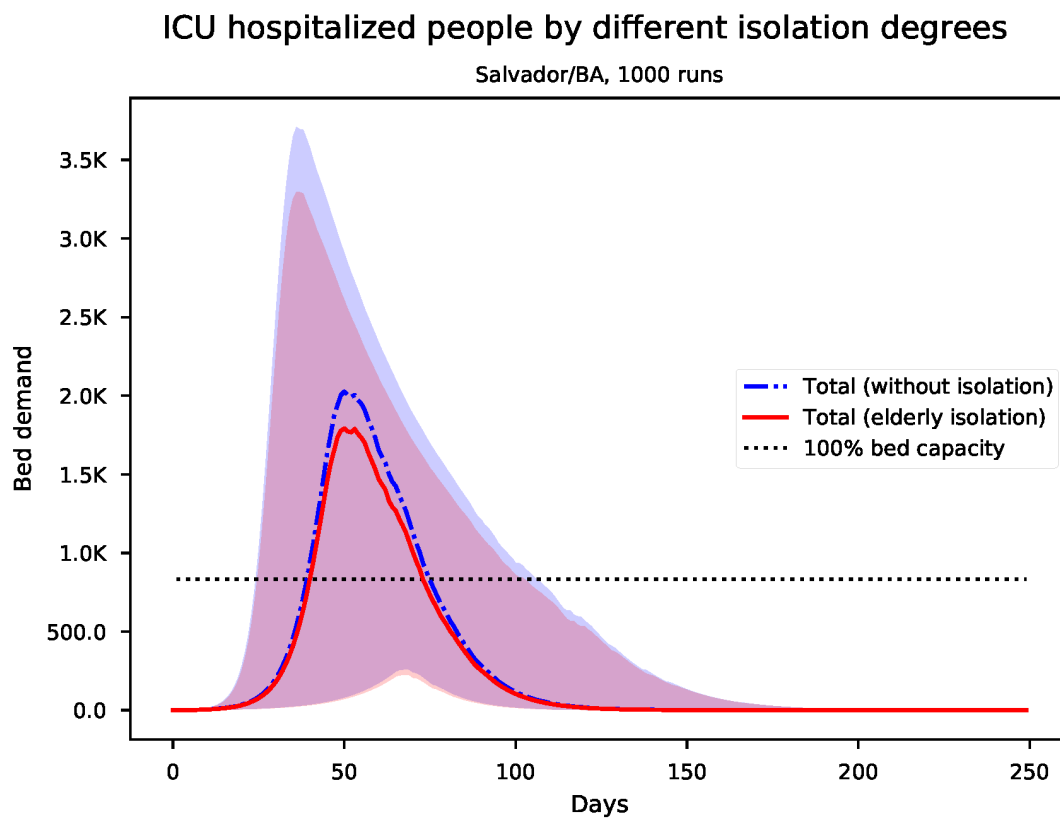

Figure S135: Predicted number of needed ICU beds for Salvador

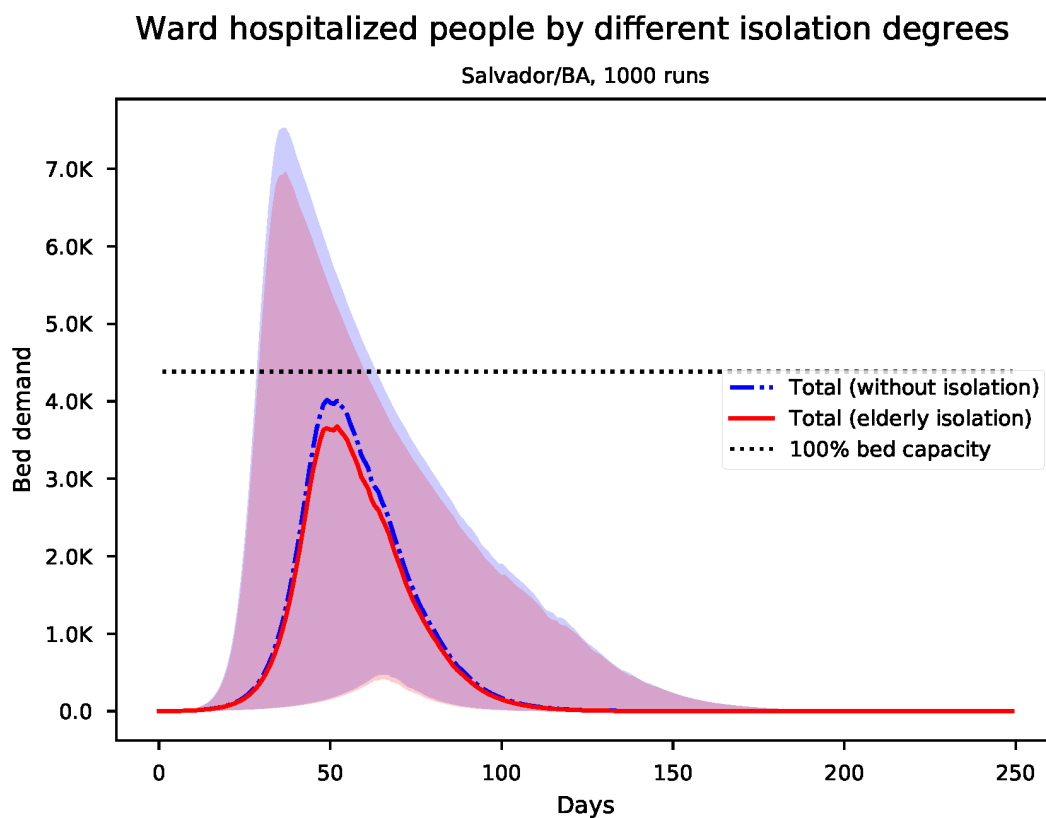

Figure S136: Predicted number of needed ward beds for Salvador

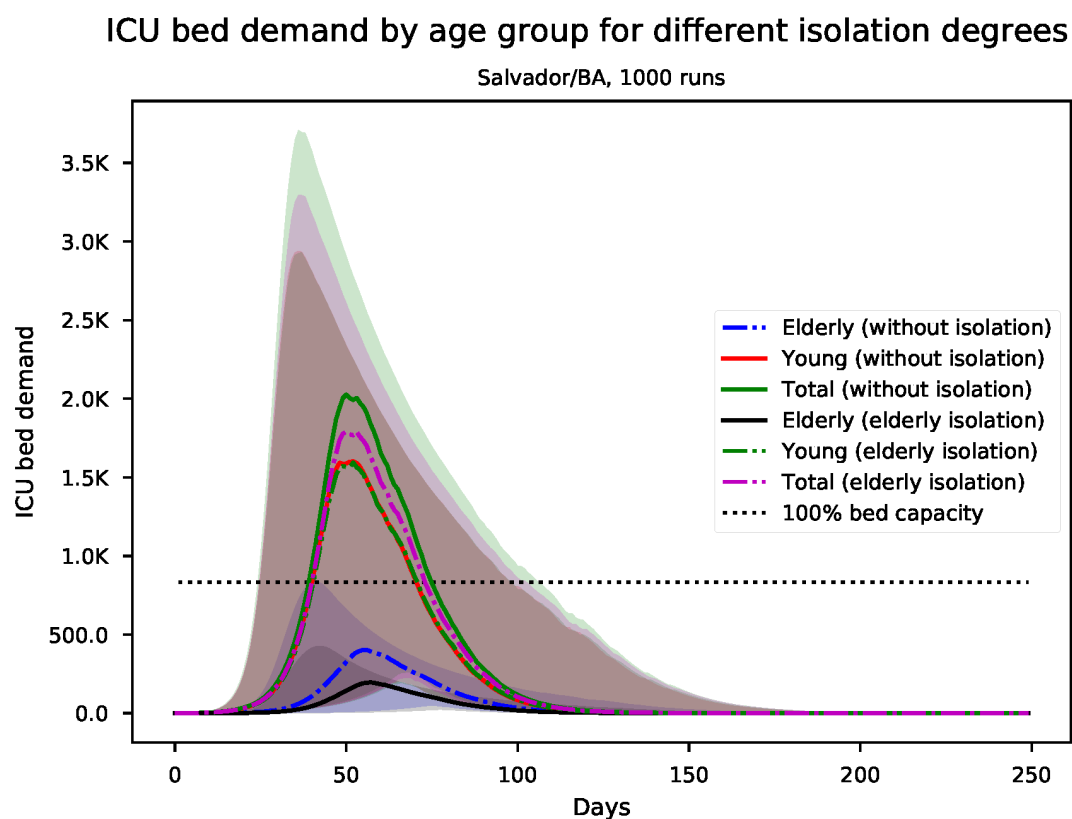

Figure S137: Predicted number of needed ICU beds, by age group for Salvador

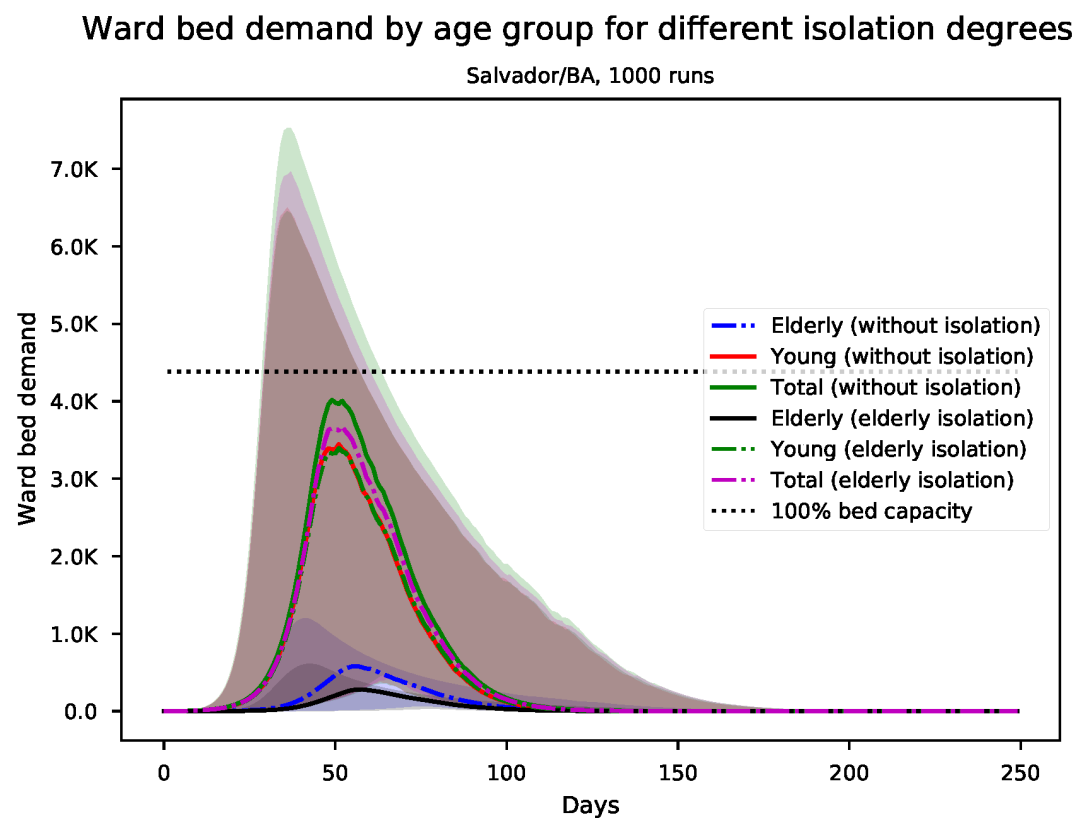

Figure S138: Predicted number of needed ward beds, by age group for Salvador

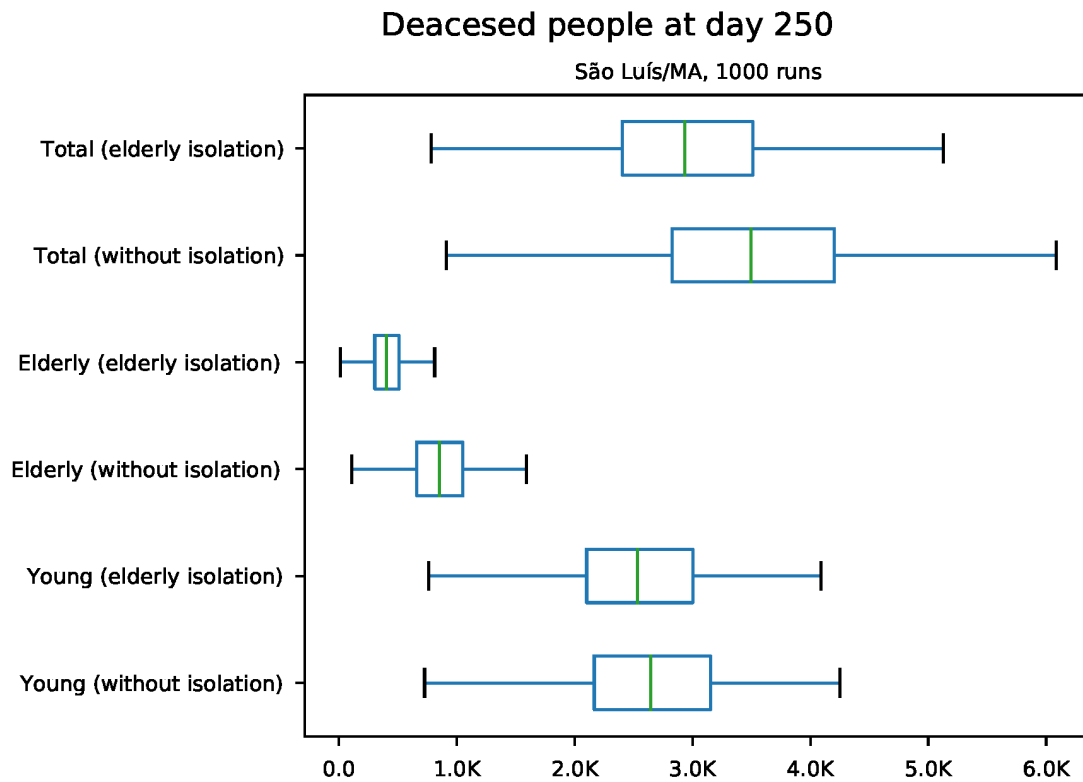

Figure S139: Predicted number of death at day 250 for São Luís

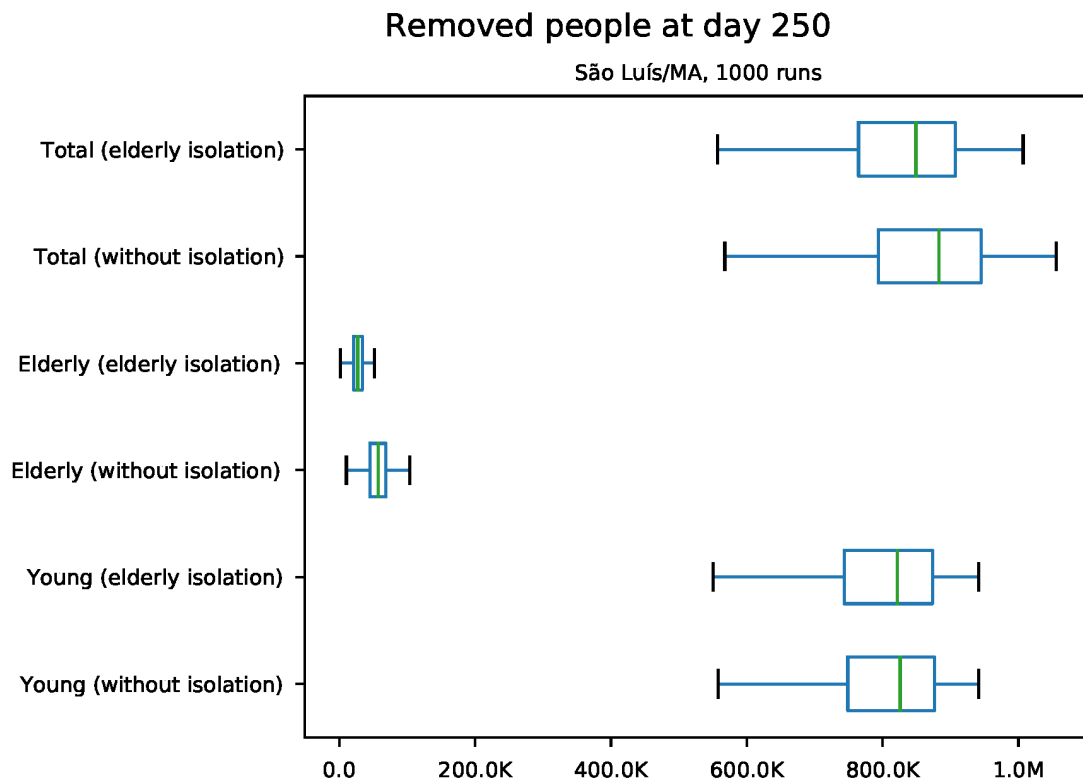

Figure S140: Predicted number of removed individuals at day 250 for São Luís

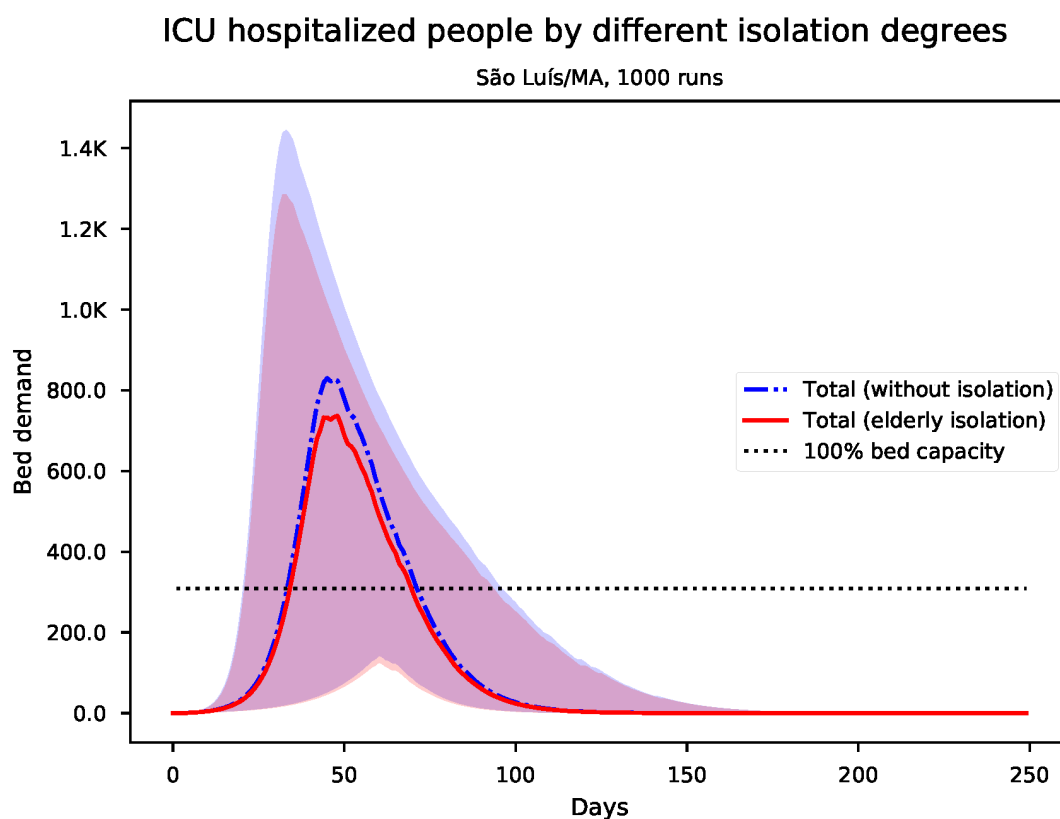

Figure S141: Predicted number of needed ICU beds for São Luís

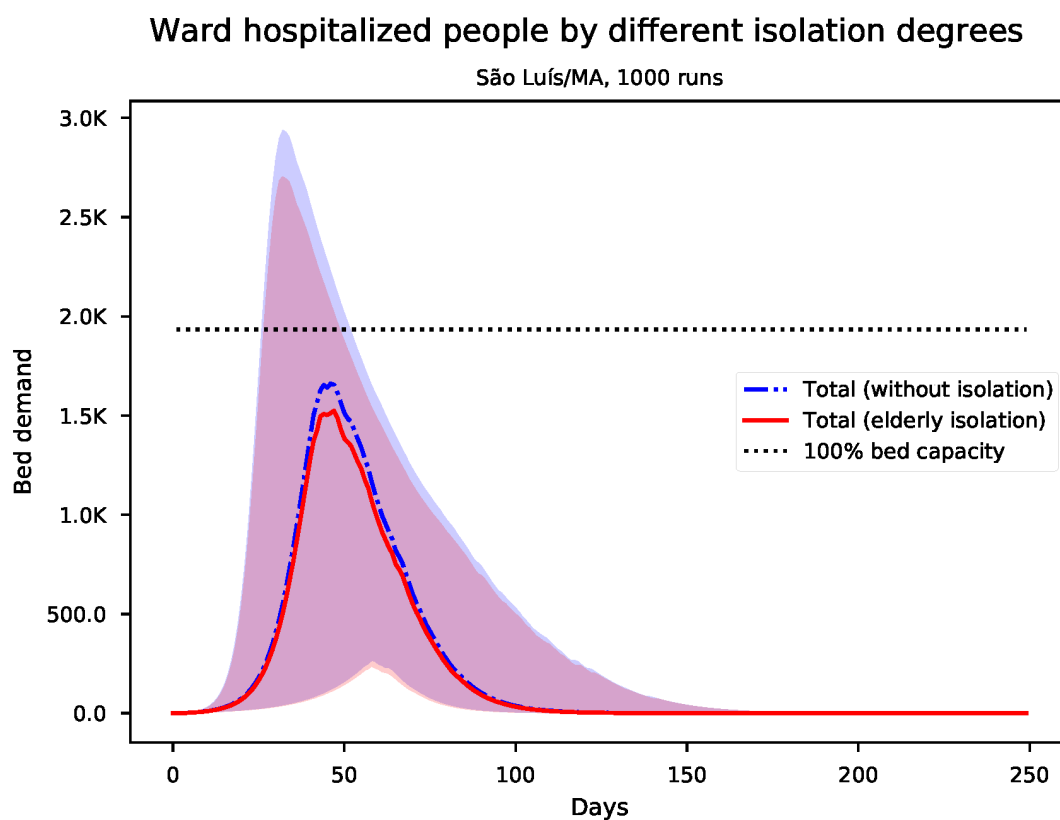

Figure S142: Predicted number of needed ward beds for São Luís

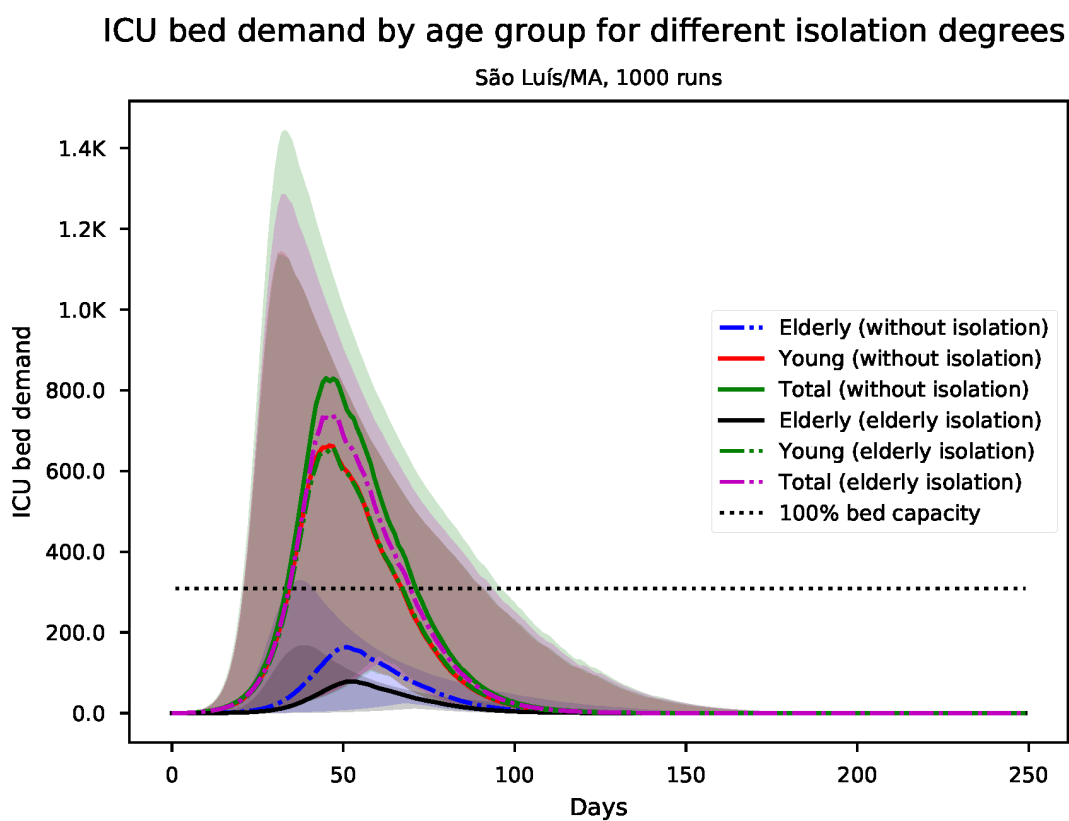

Figure S143: Predicted number of needed ICU beds, by age group for São Luís

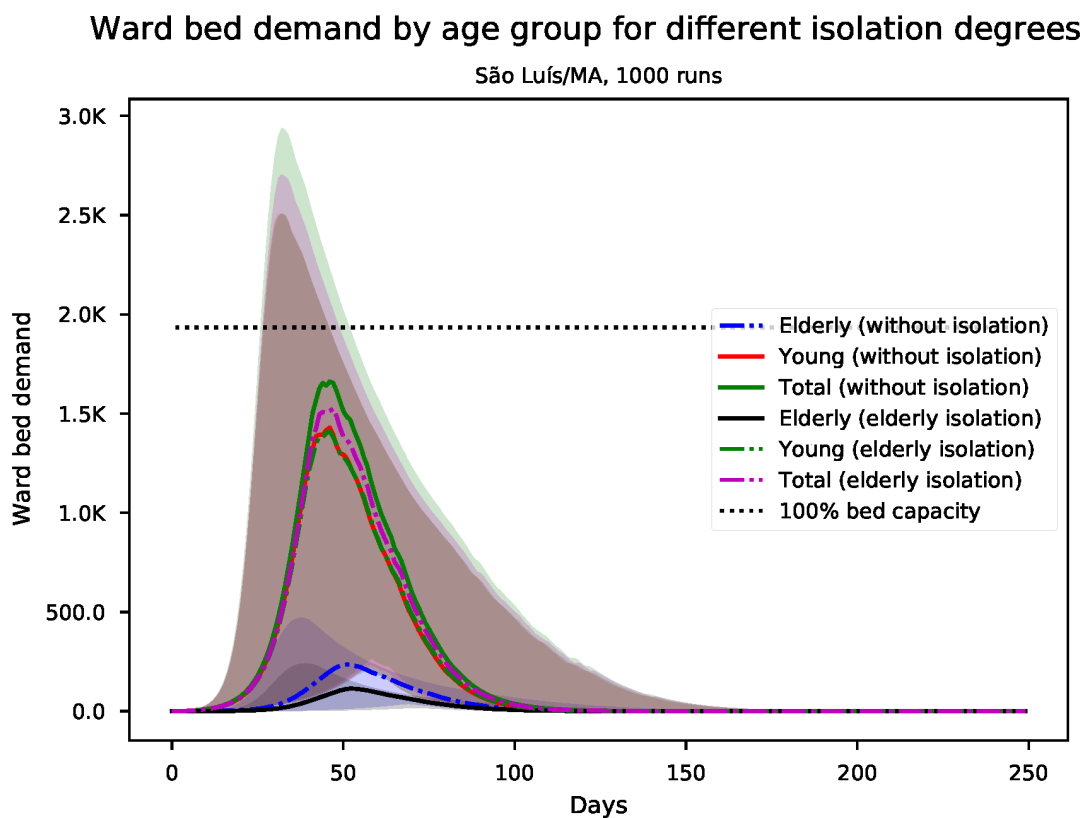

Figure S144: Predicted number of needed ward beds, by age group for São Luís

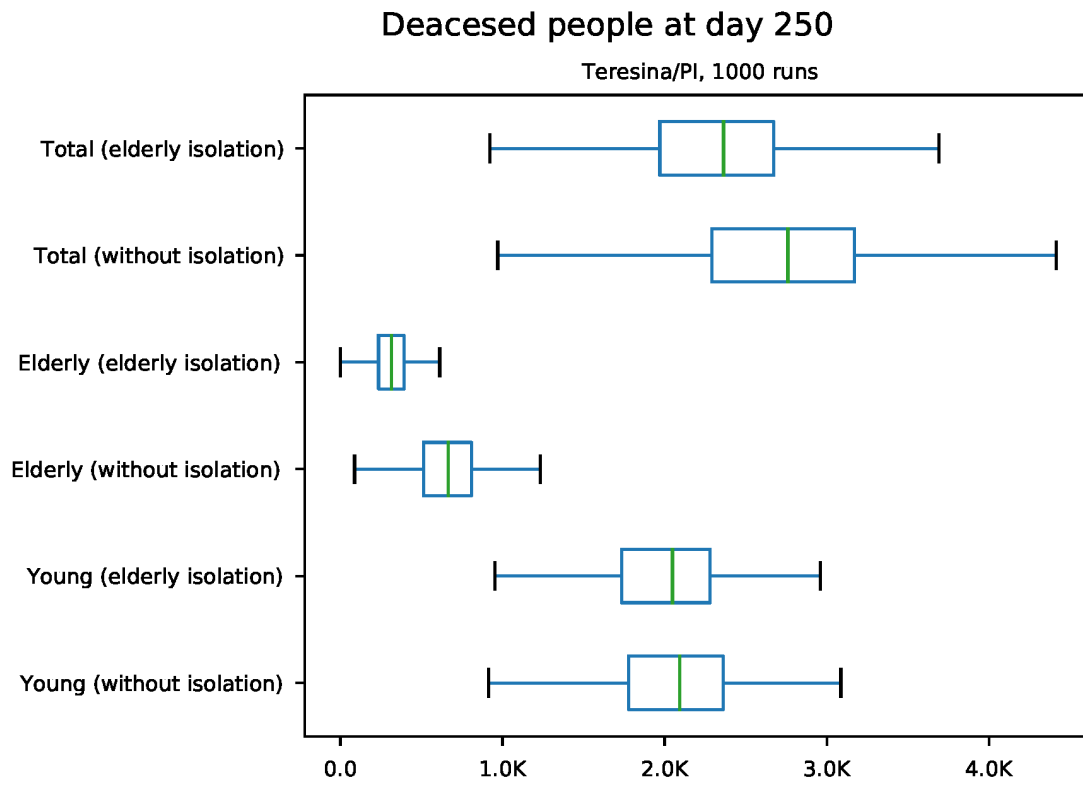

Figure S145: Predicted number of death at day 250 for Teresina

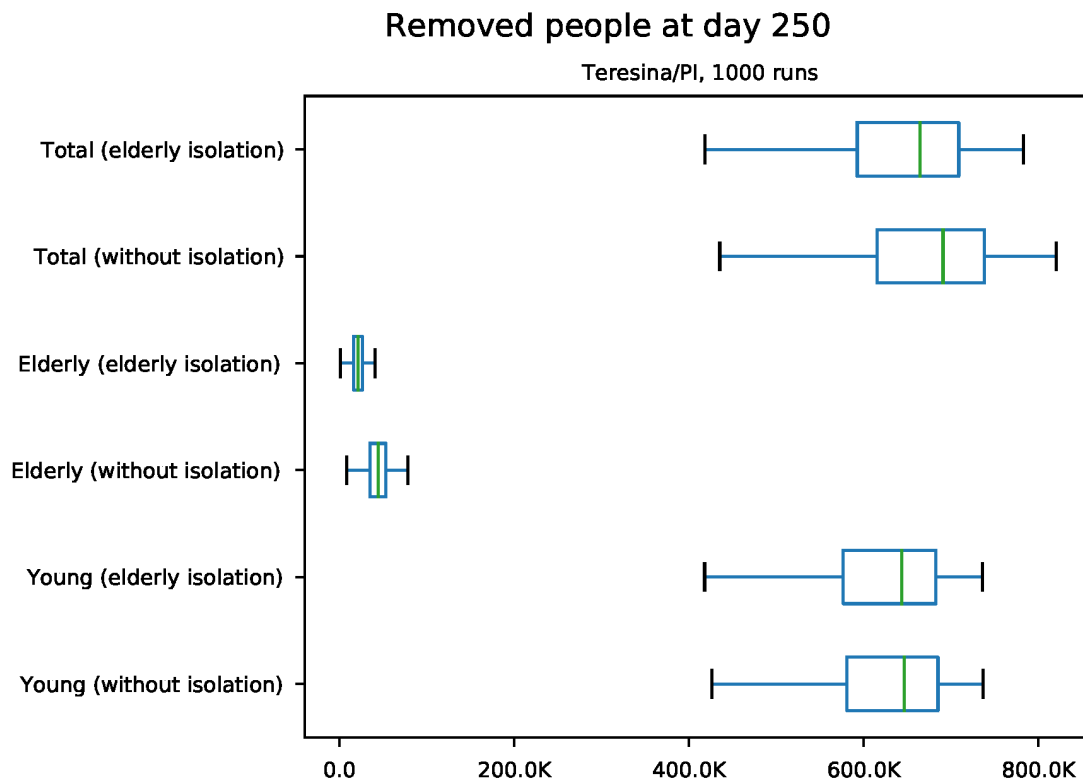

Figure S146: Predicted number of removed individuals at day 250 for Teresina

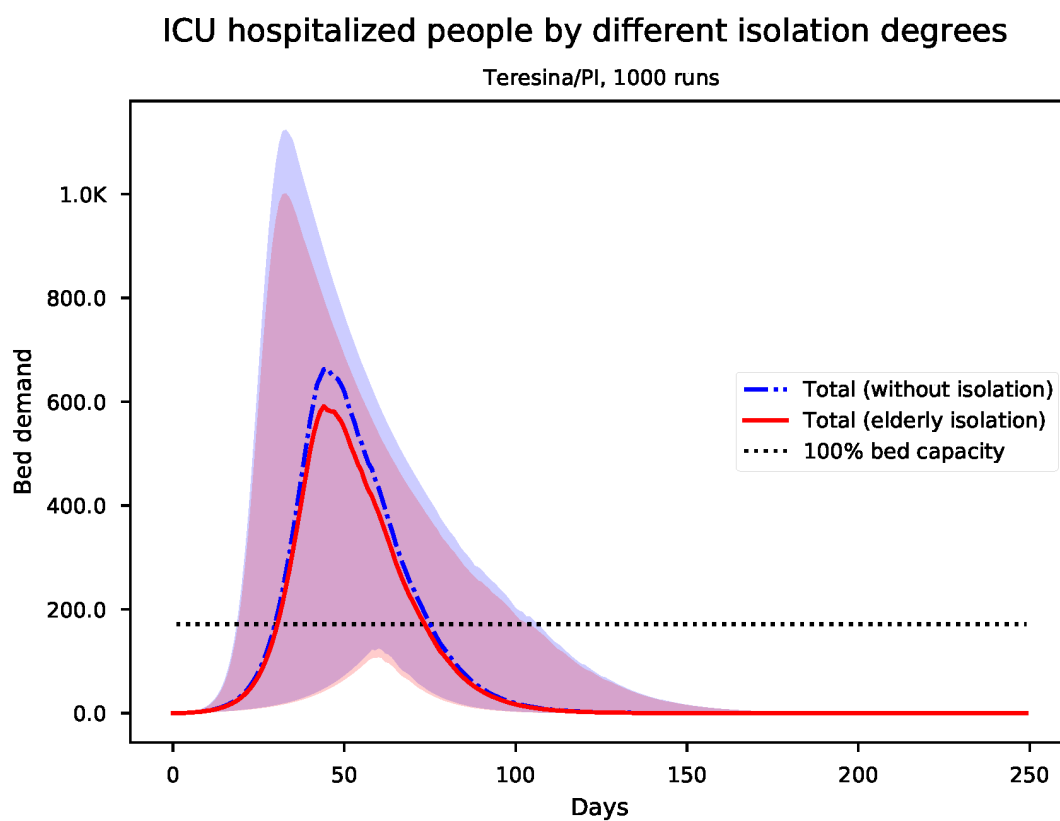

Figure S147: Predicted number of needed ICU beds for Teresina

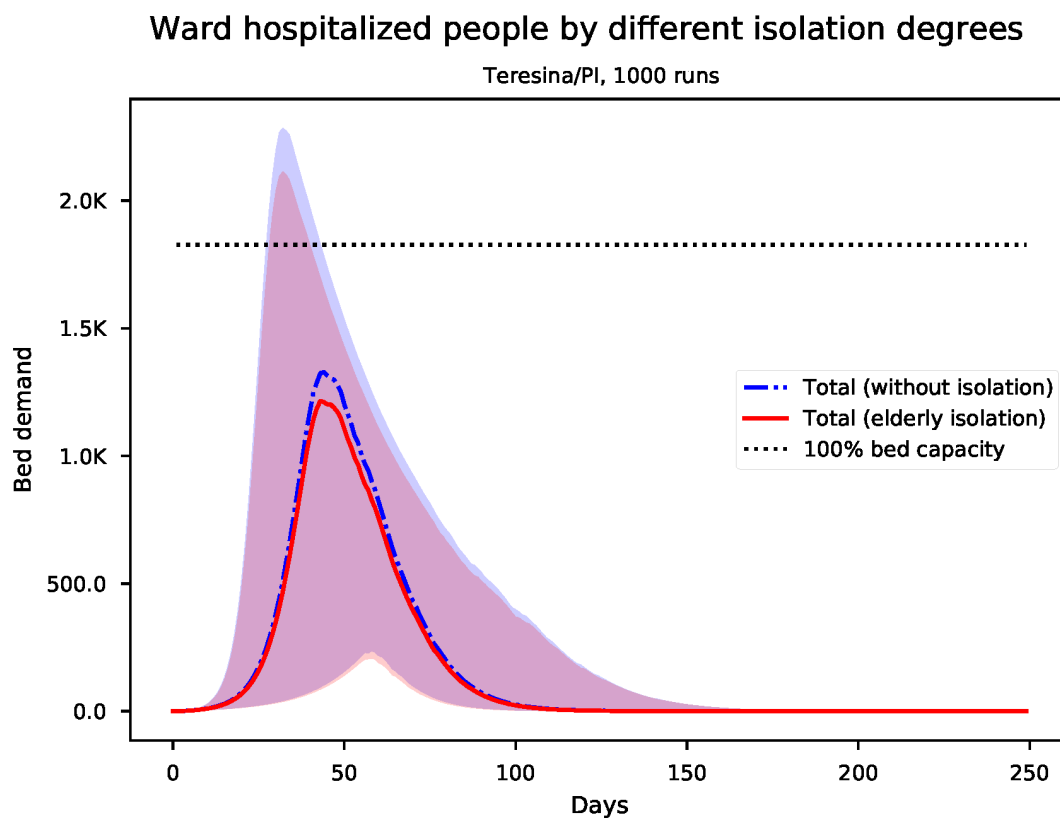

Figure S148: Predicted number of needed ward beds for Teresina

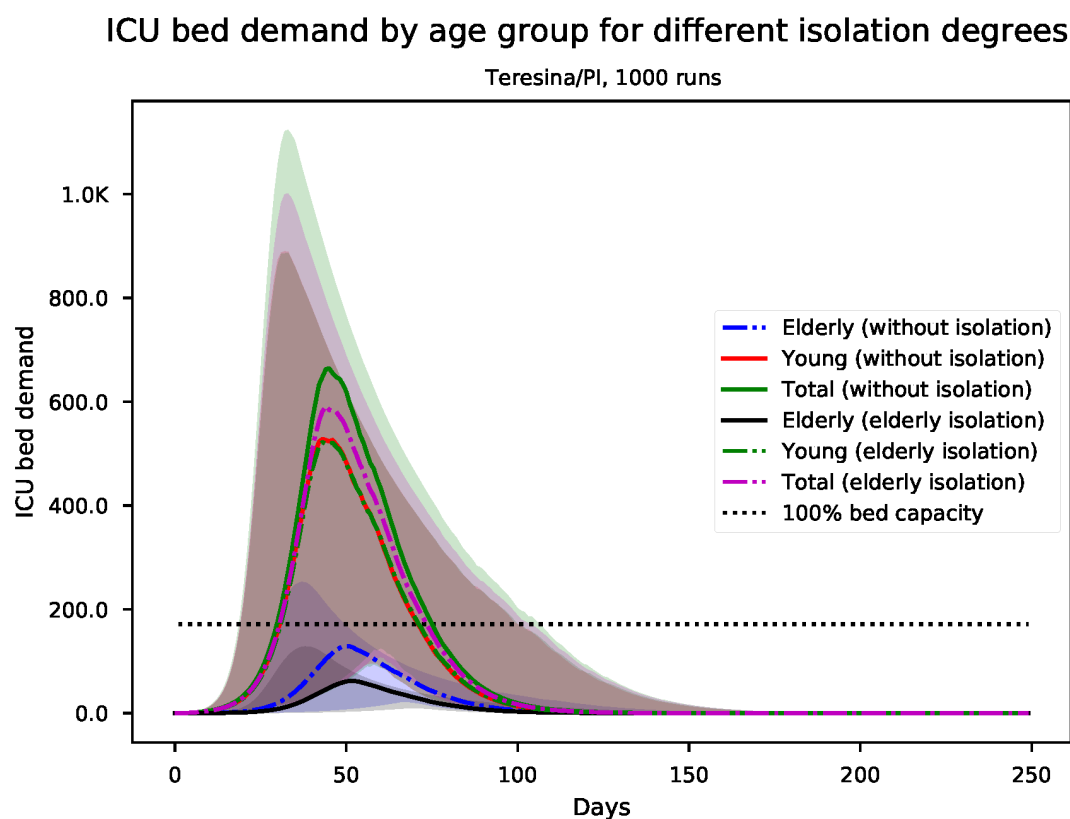

Figure S149: Predicted number of needed ICU beds, by age group for Teresina

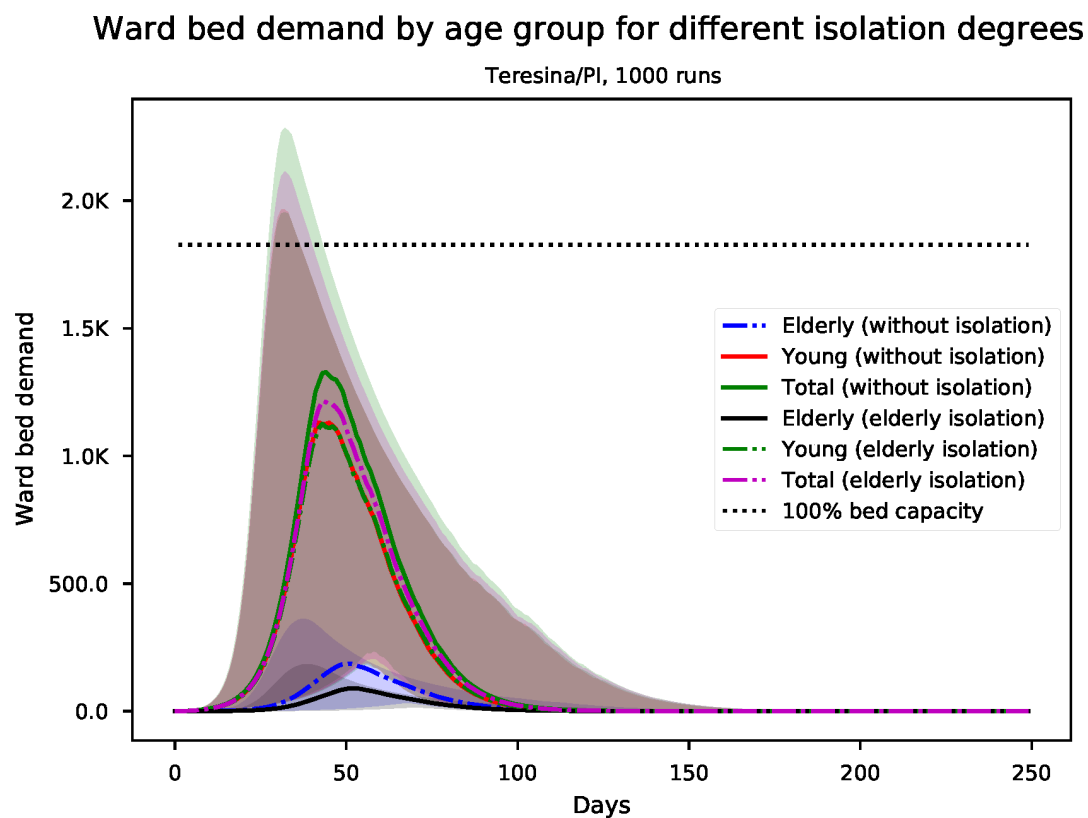

Figure S150: Predicted number of needed ward beds, by age group for Teresina

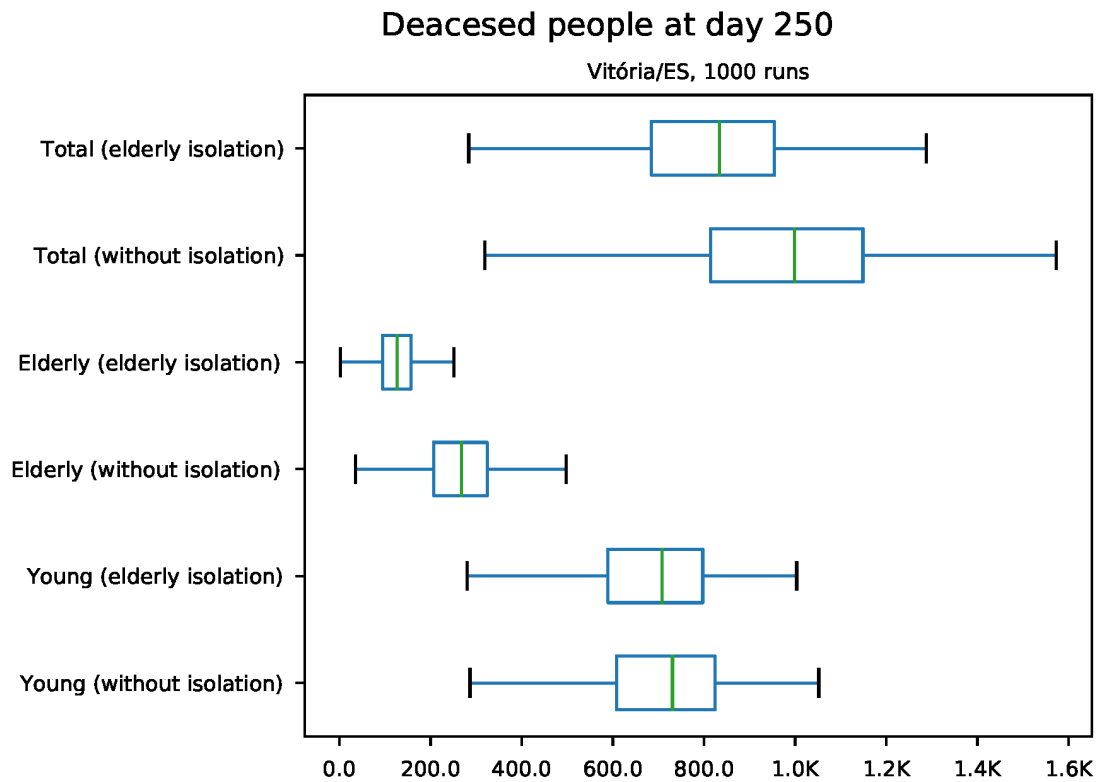

Figure S151: Predicted number of death at day 250 for Vitória

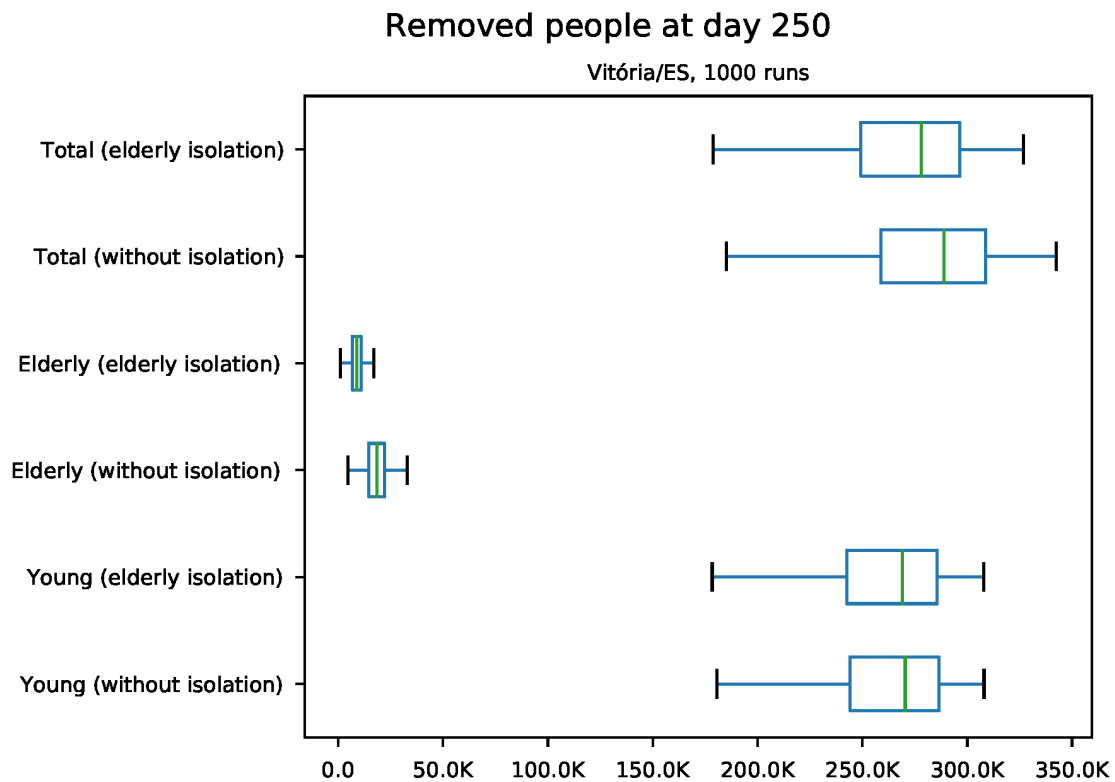

Figure S152: Predicted number of removed individuals at day 250 for Vitória

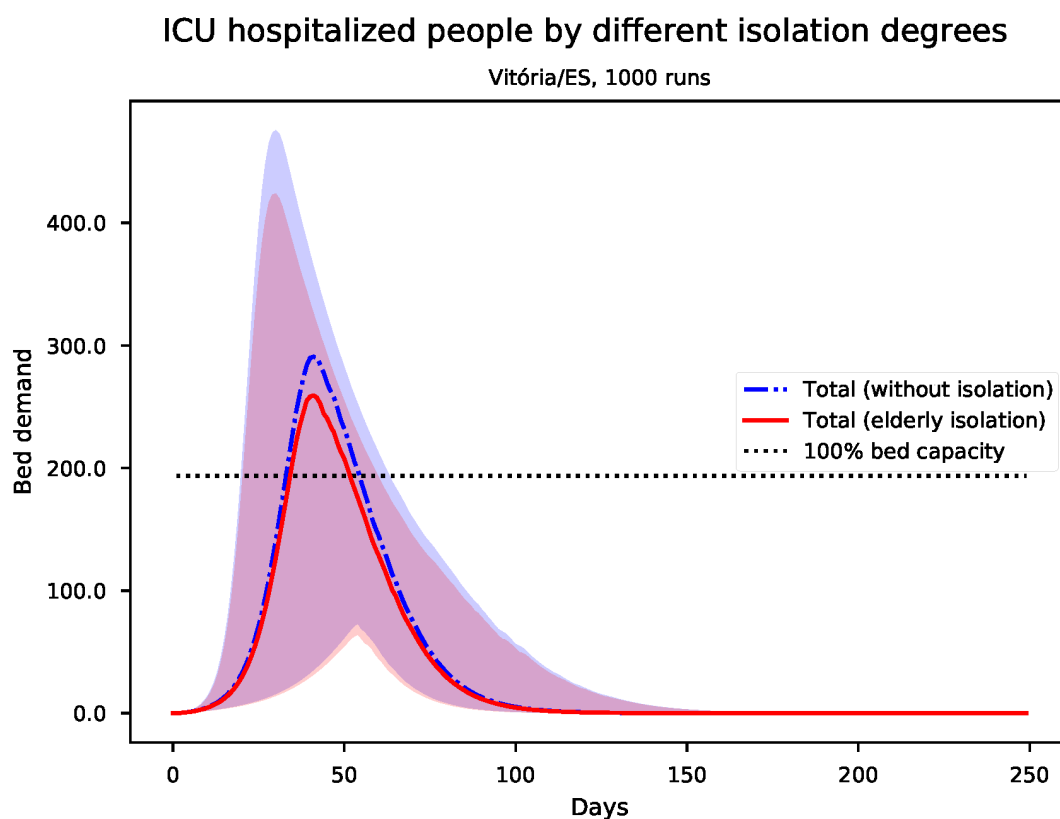

Figure S153: Predicted number of needed ICU beds for Vitória

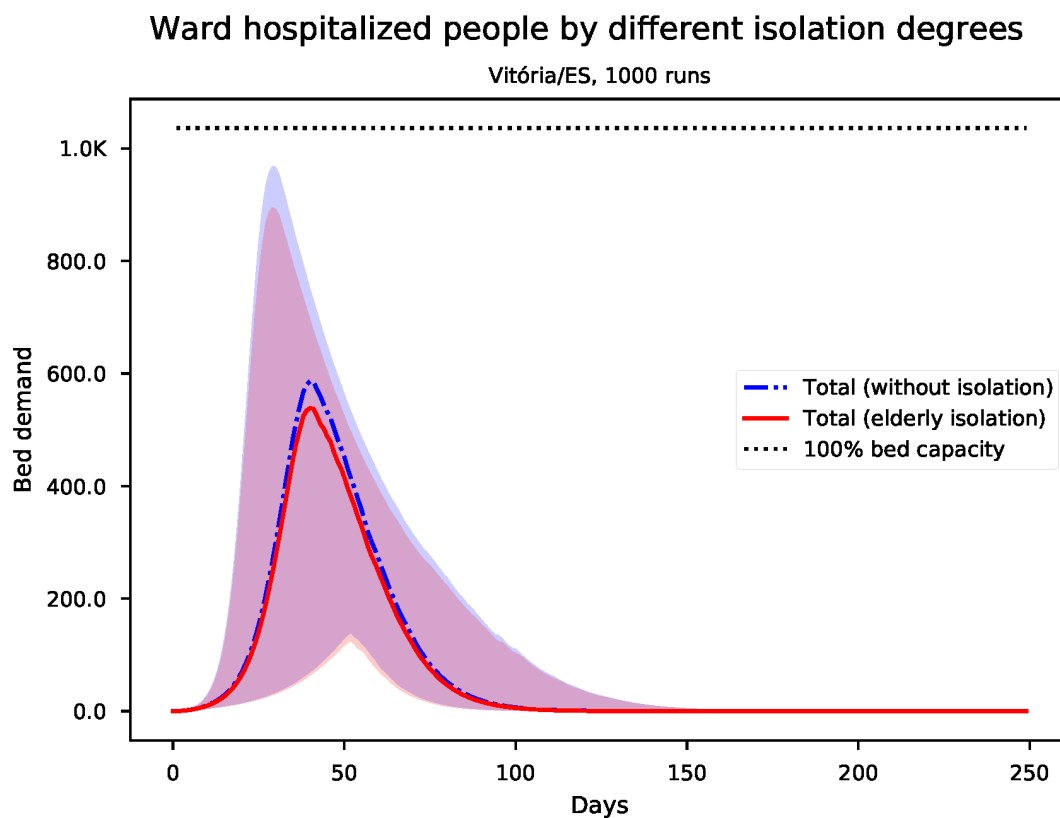

Figure S154: Predicted number of needed ward beds for Vitória

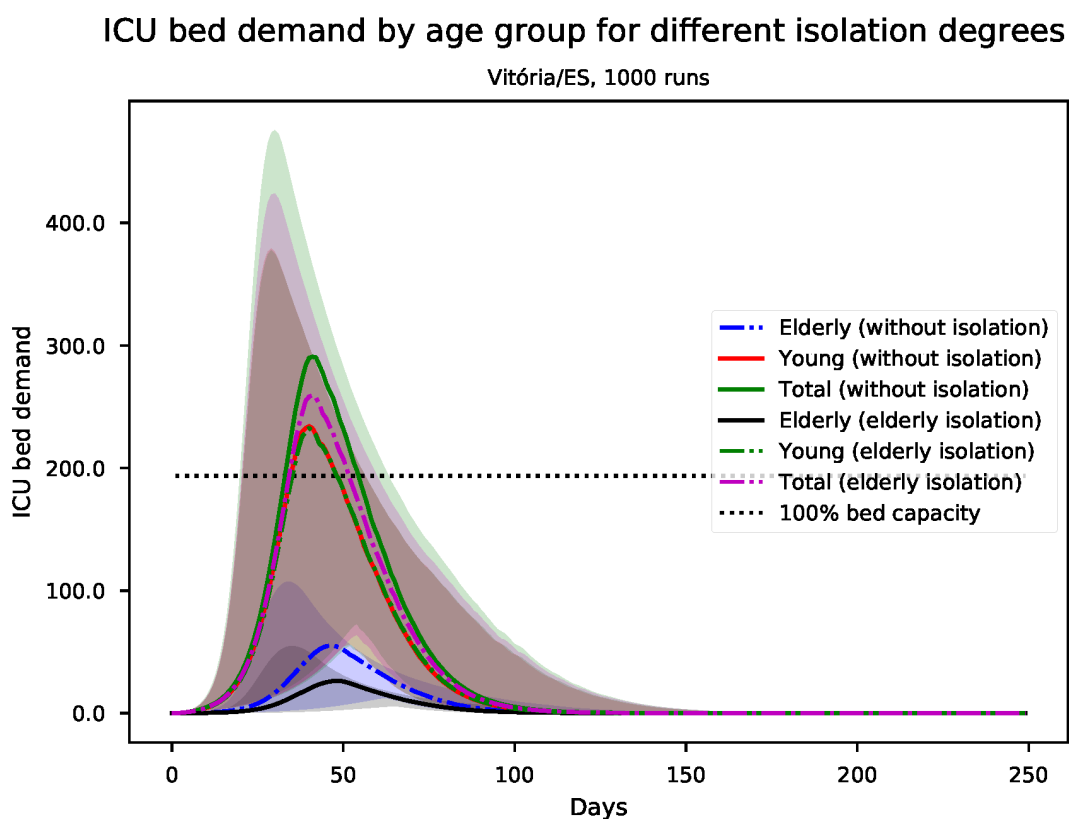

Figure S155: Predicted number of needed ICU beds, by age group for Vitória

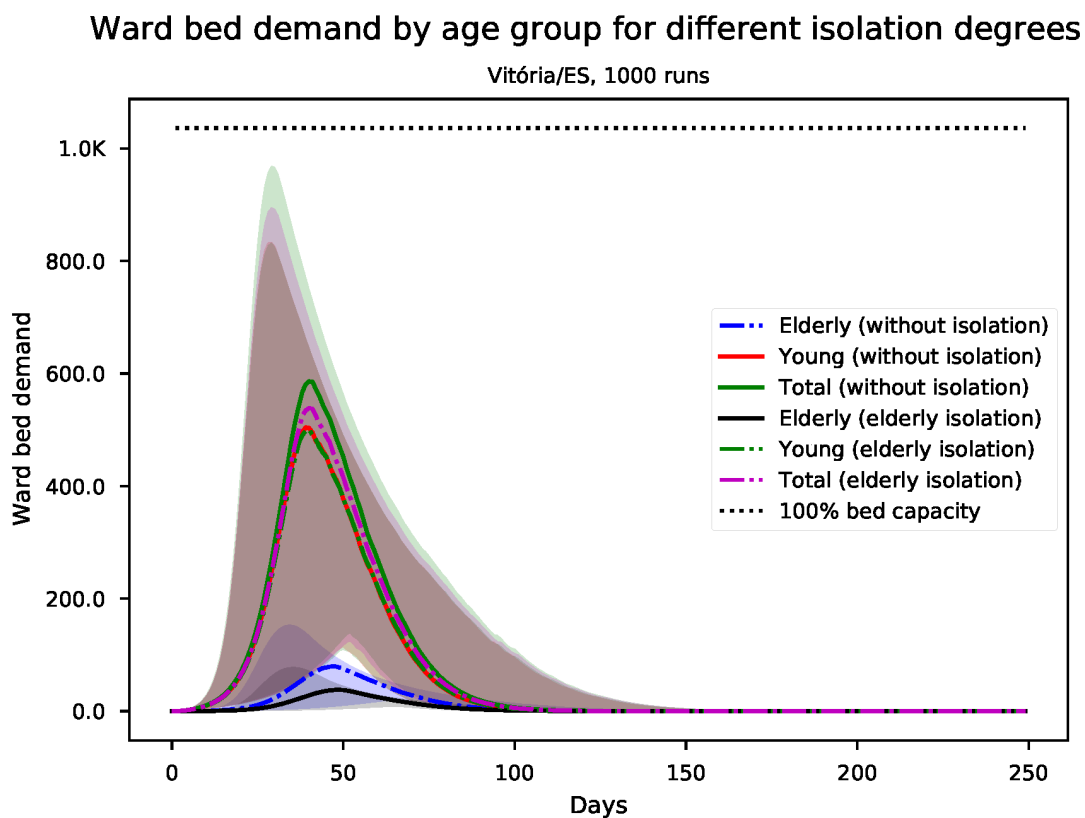

Figure S156: Predicted number of needed ward beds, by age group for Vitória
